# Supplementary material for: Complexes of resorcin[4]arene with secondary amines: synthesis, solvent influence on “in-out” structure, and theoretical calculations of non-covalent interactions
Source: publisher site journal article supplement (doi:10.3762/bjoc.19.109), 2023-09-29
Supplement: Additional file 1 [file 1860-5397-19-109-S1.pdf]

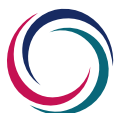

## Supporting Information

for

### **Complexes of resorcin[4]arene with secondary amines: synthesis, solvent influence on “*in-out*” structure, and theoretical calculations of non-covalent interactions**

Waldemar Iwanek

*Beilstein J. Org. Chem.* **2023**, *19*, 1525–1536. [doi:10.3762/bjoc.19.109](https://doi.org/10.3762/bjoc.19.109)

### **NMR spectra of complexes and coordinates of the optimized complex structures**

## Table of contents

1. NMR spectra of R[4]A complexes with sec-amines.
2. The xyz coordinates of the optimized complex structures calculated by the PBE0-D4/mTZVPP method in  $\text{CHCl}_3$  and DMSO.

1. NMR spectra of R[4]A complexes with sec-amines

**R[4]A:dimethylamine**

<sup>1</sup>H NMR in DMSO

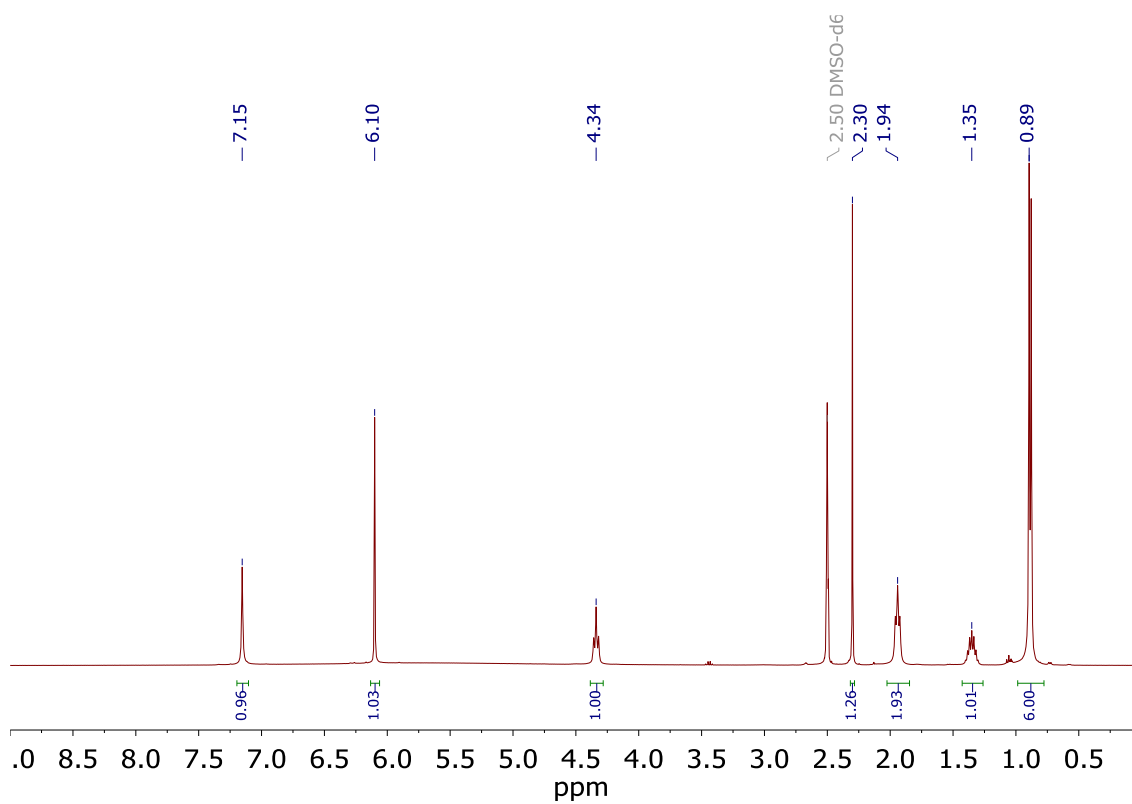

<sup>1</sup>H NMR in CDCl<sub>3</sub>

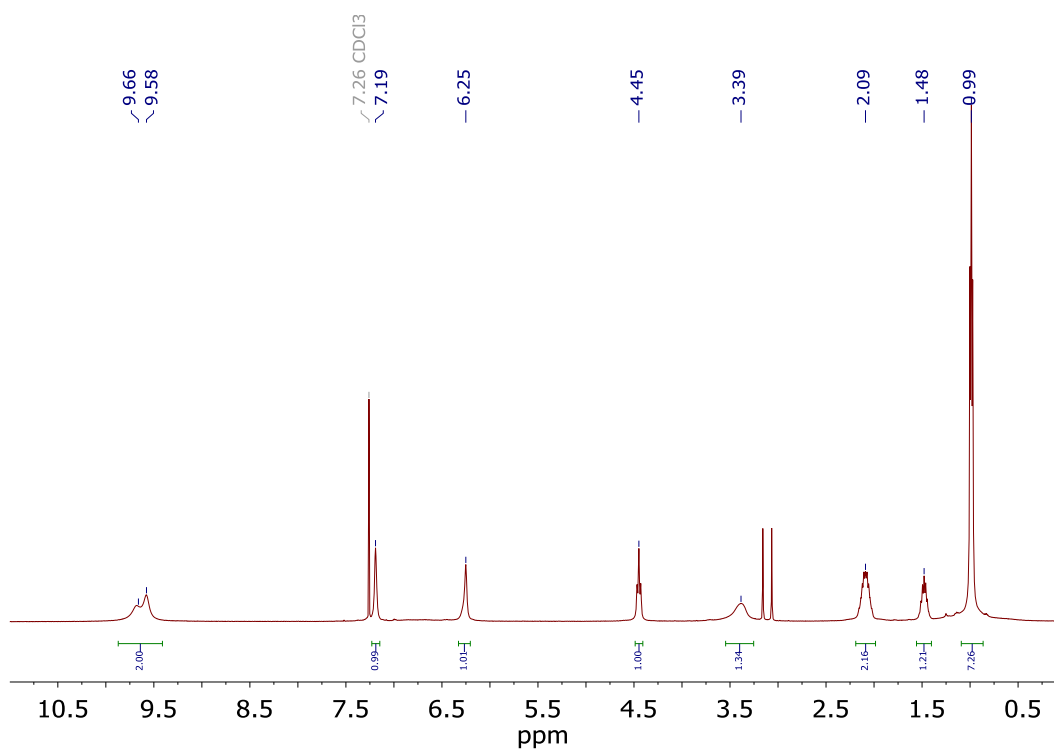

$^{13}\text{C}$  NMR in  $\text{DMSO-}d_6$

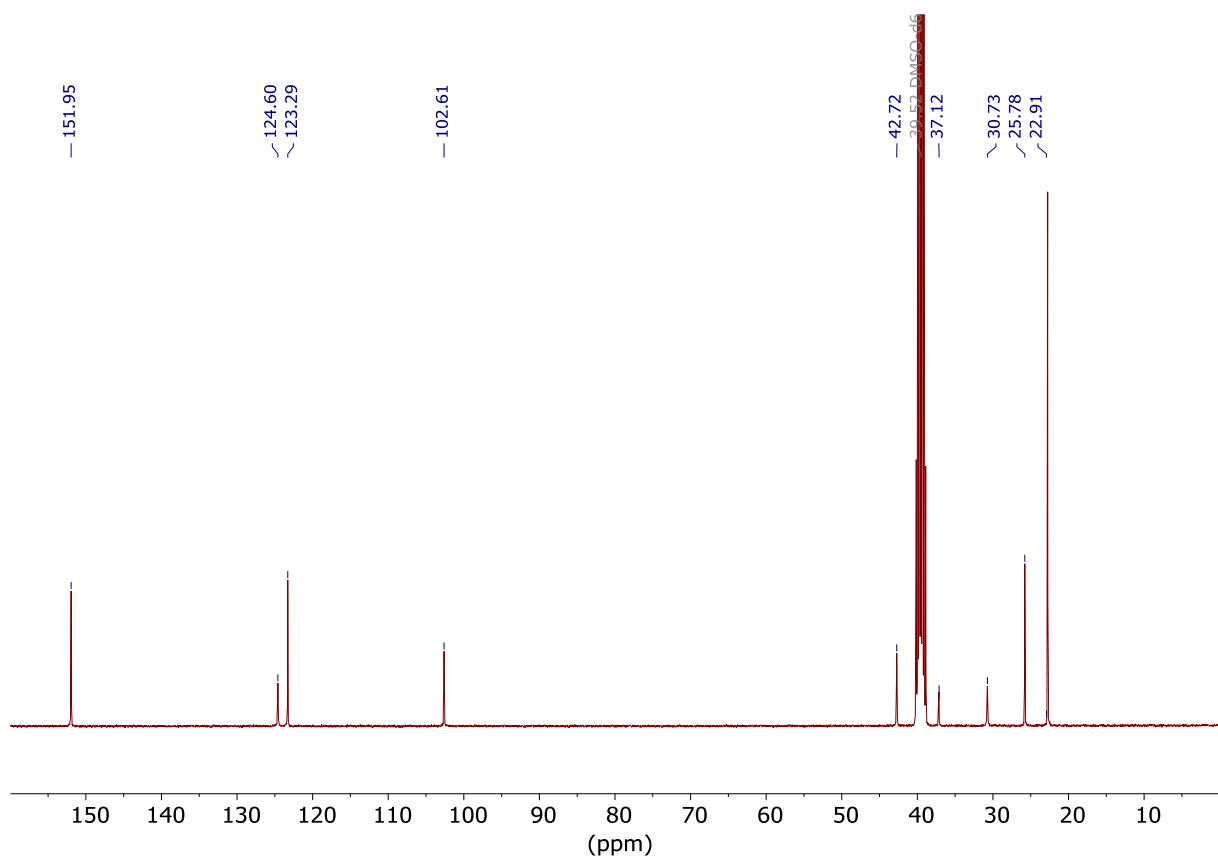

HSQC  $^{13}\text{C}$   $\text{DMSO-}d_6$

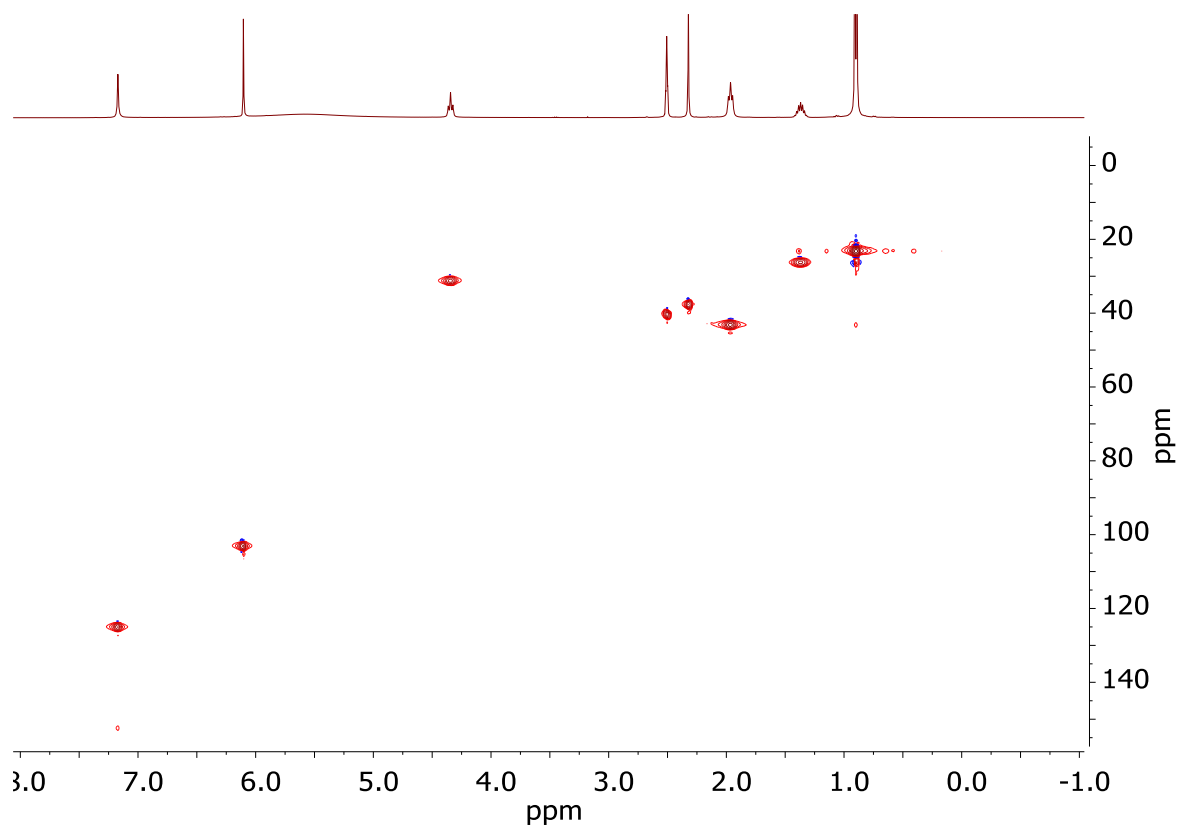

**R[4]A:diethylamine**

<sup>1</sup>H NMR in DMSO

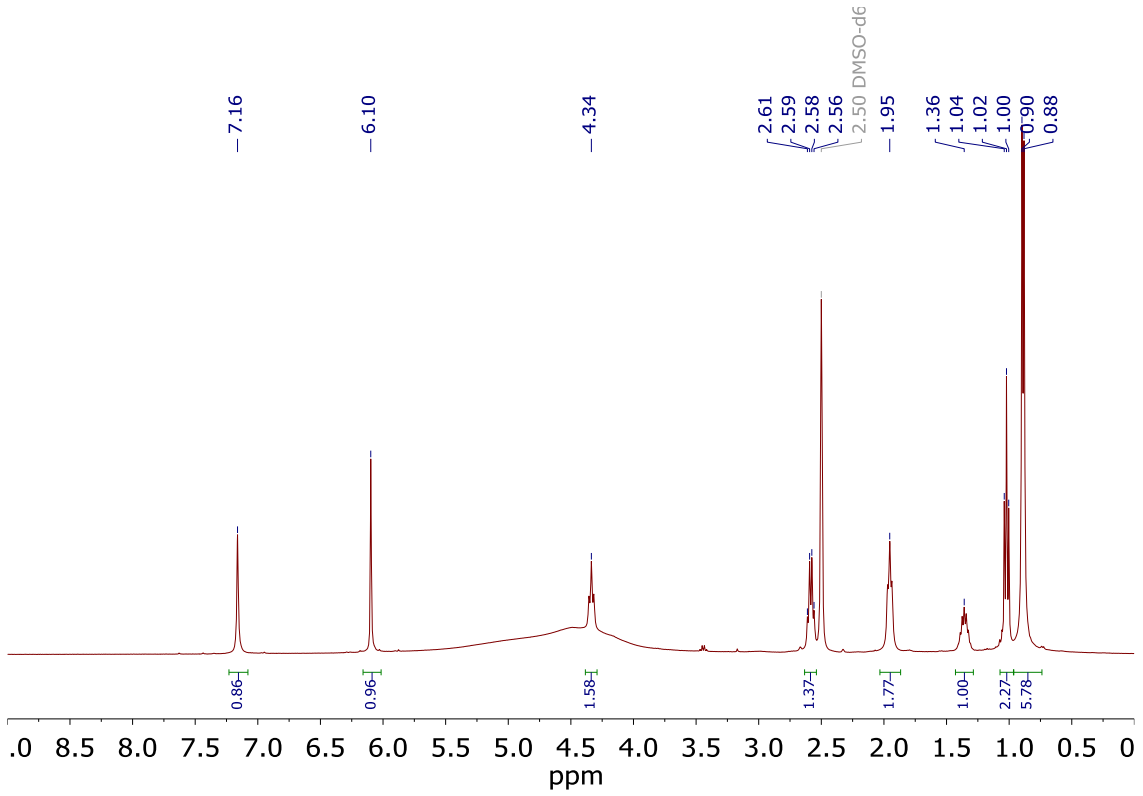

<sup>1</sup>H NMR in CDCl<sub>3</sub>

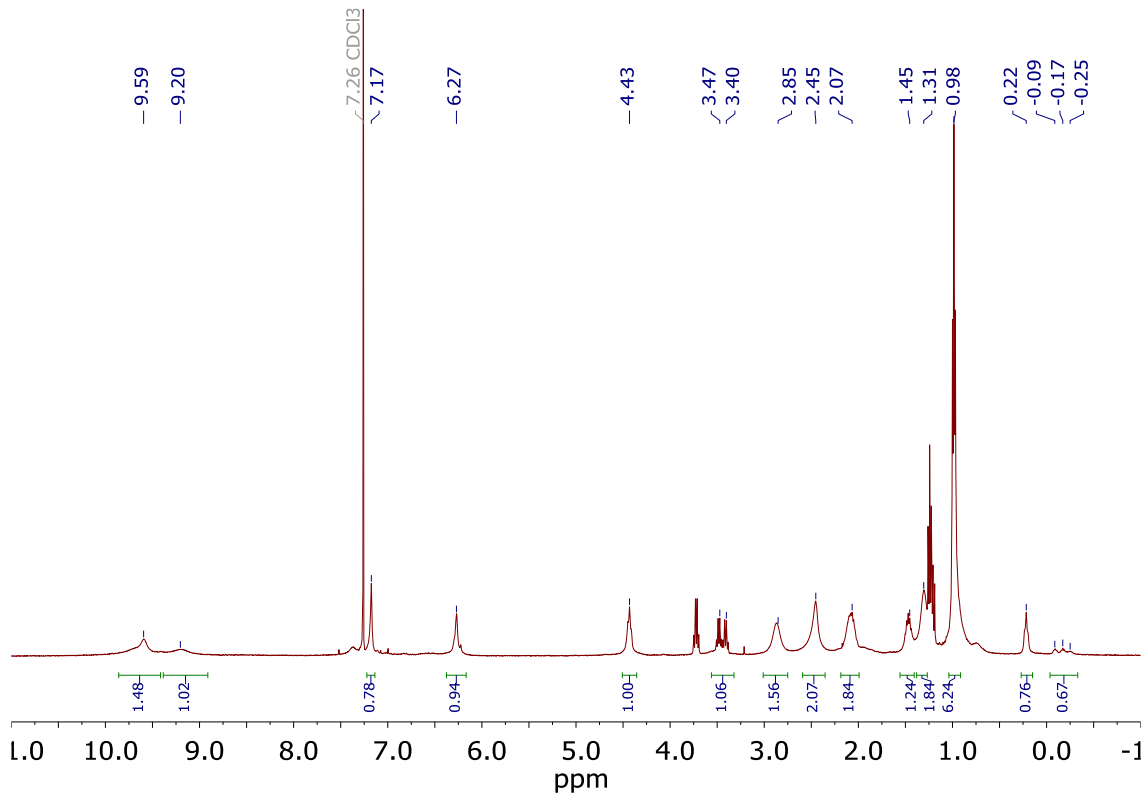

$^{13}\text{C}$  NMR in  $\text{DMSO-}d_6$

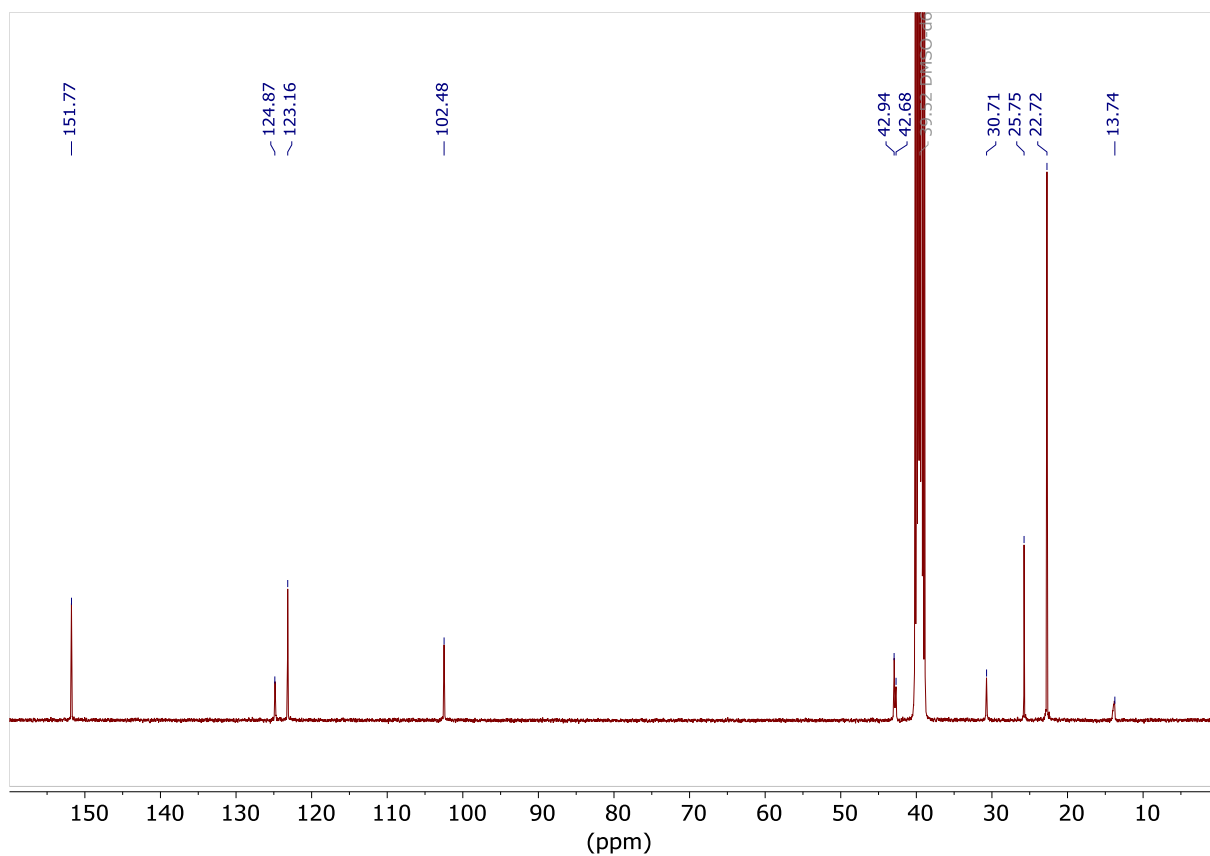

HSQC  $^{13}\text{C}$   $\text{DMSO-}d_6$

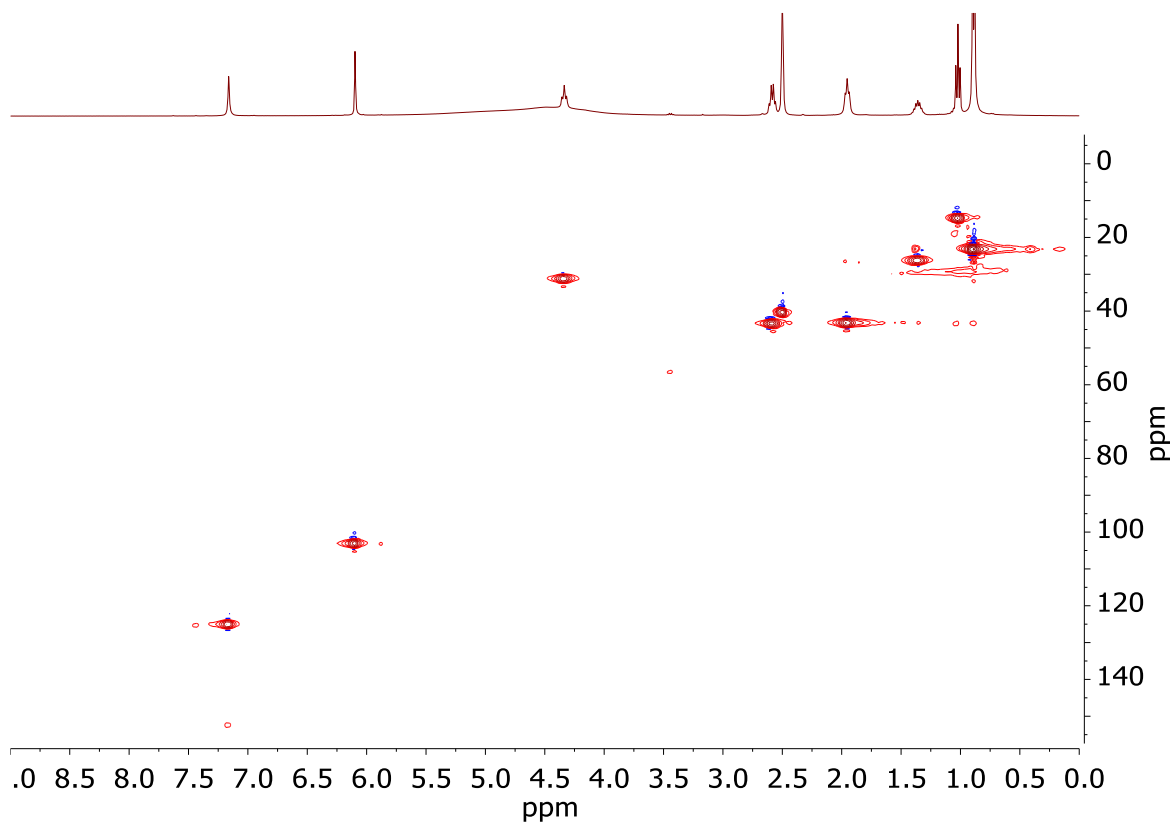

# R[4]A:pyrrolidine

$^1\text{H}$  NMR in DMSO

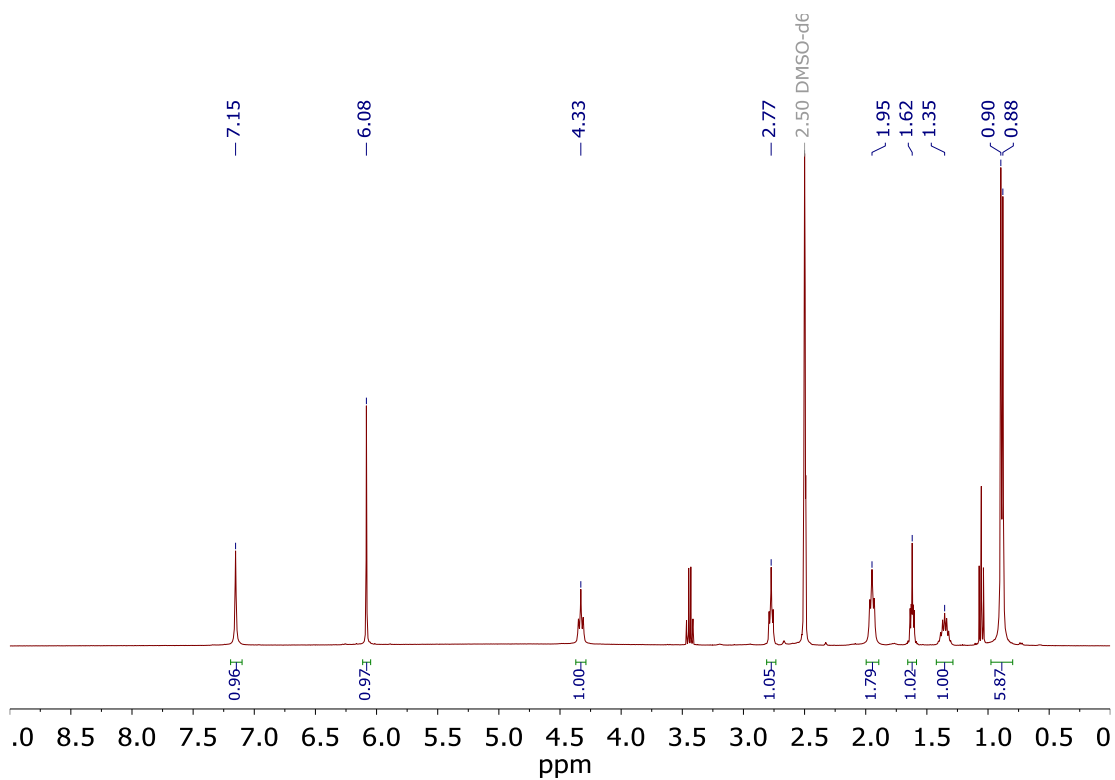

$^{13}\text{C}$  NMR DMSO- $d_6$

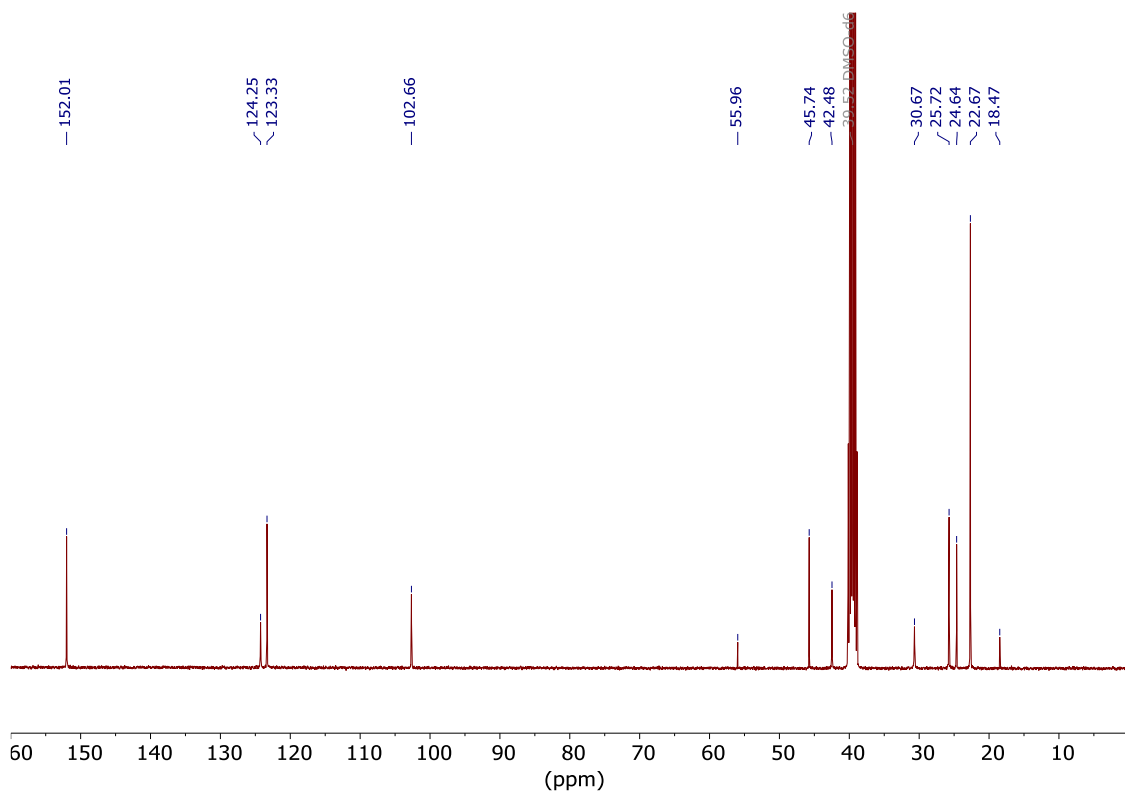

HSQC  $^{13}\text{C}$  DMSO- $d_6$

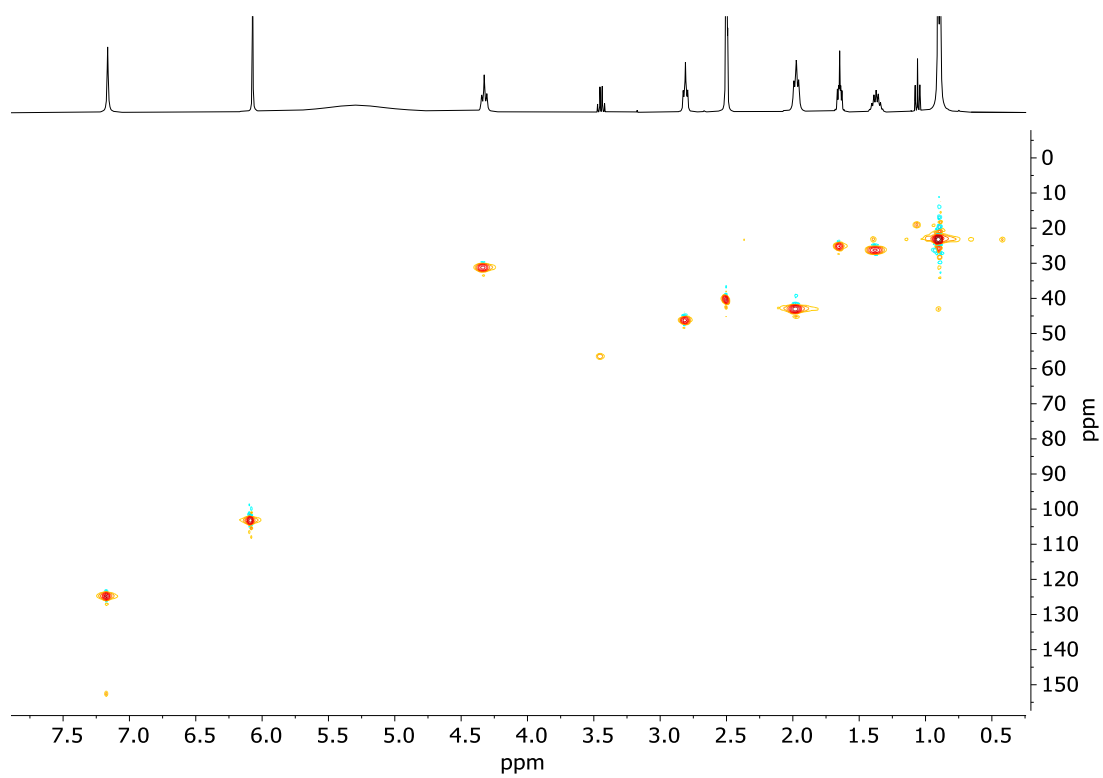

$^1\text{H}$  NMR in  $\text{CDCl}_3$

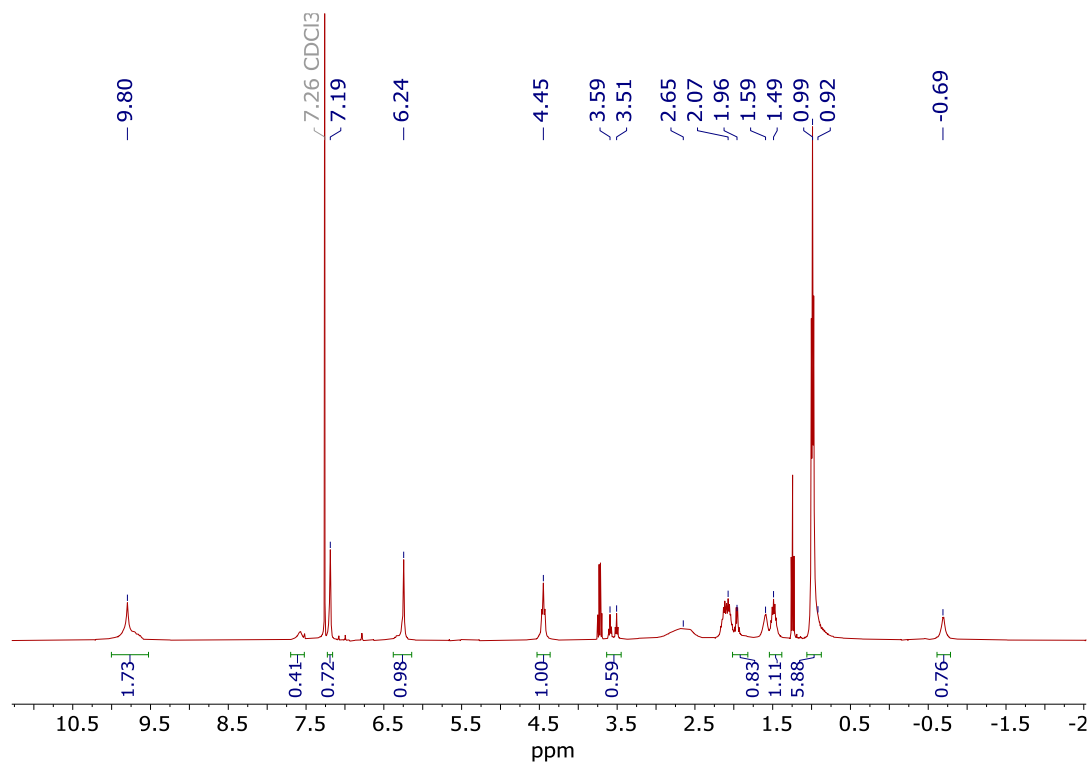



COSY  $^1\text{H}, ^1\text{H} - \text{CDCl}_3$

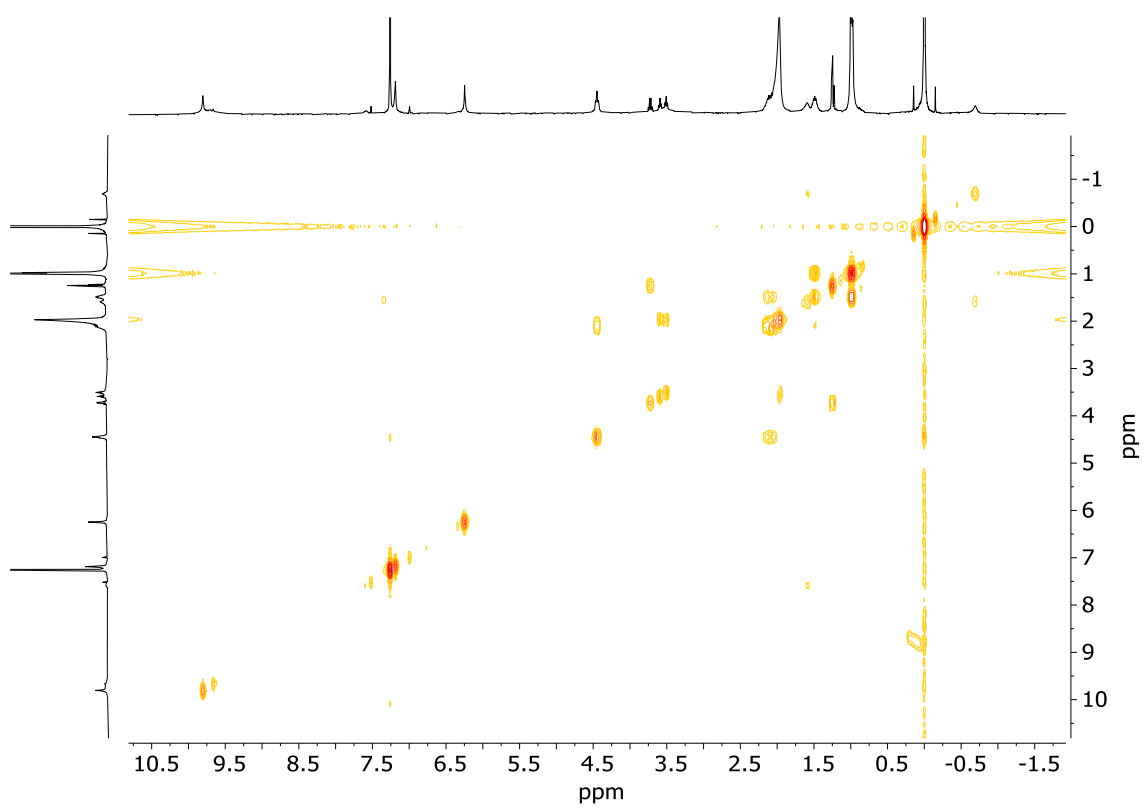

HSQC  $^{13}\text{C} - \text{CDCl}_3$

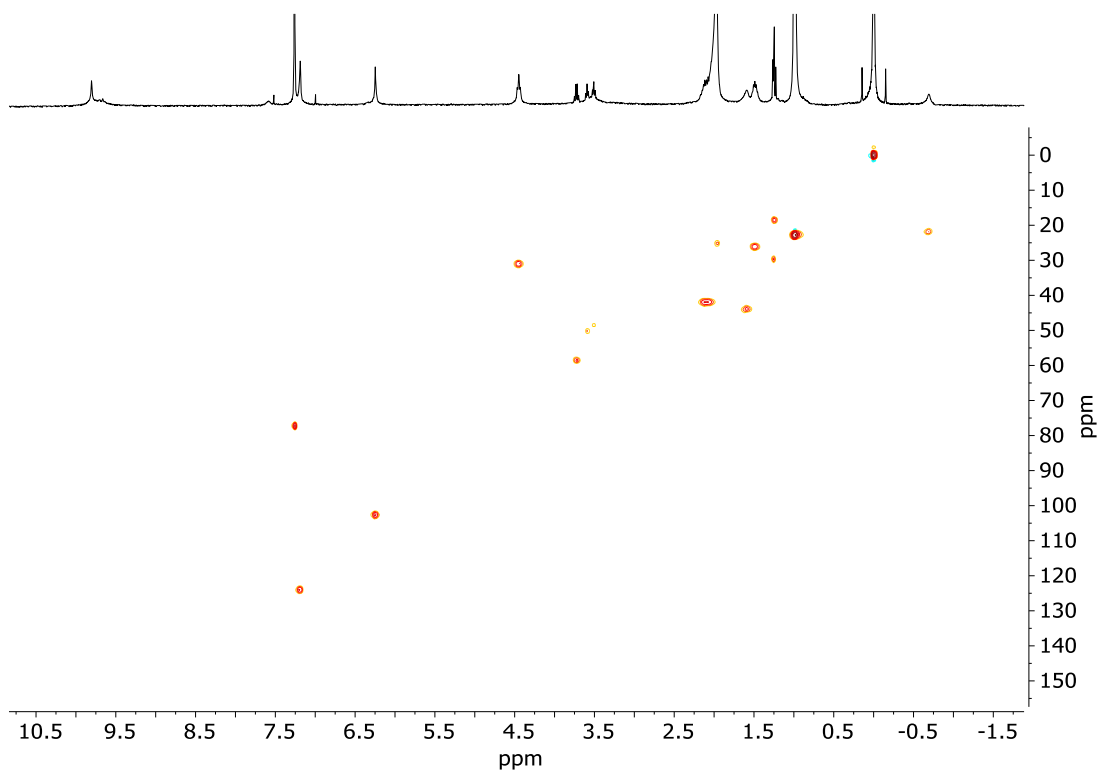

### R[4]A:piperidine

$^1\text{H}$  NMR in DMSO

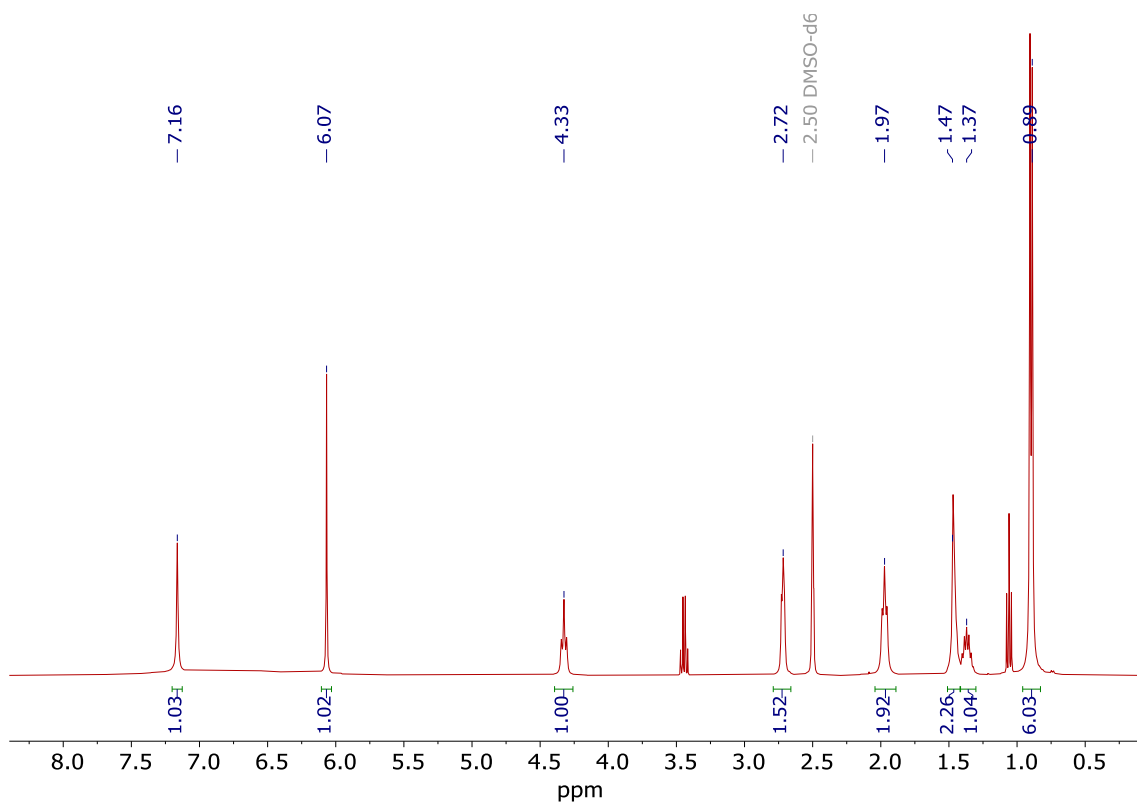

$^1\text{H}$  NMR in  $\text{CDCl}_3$

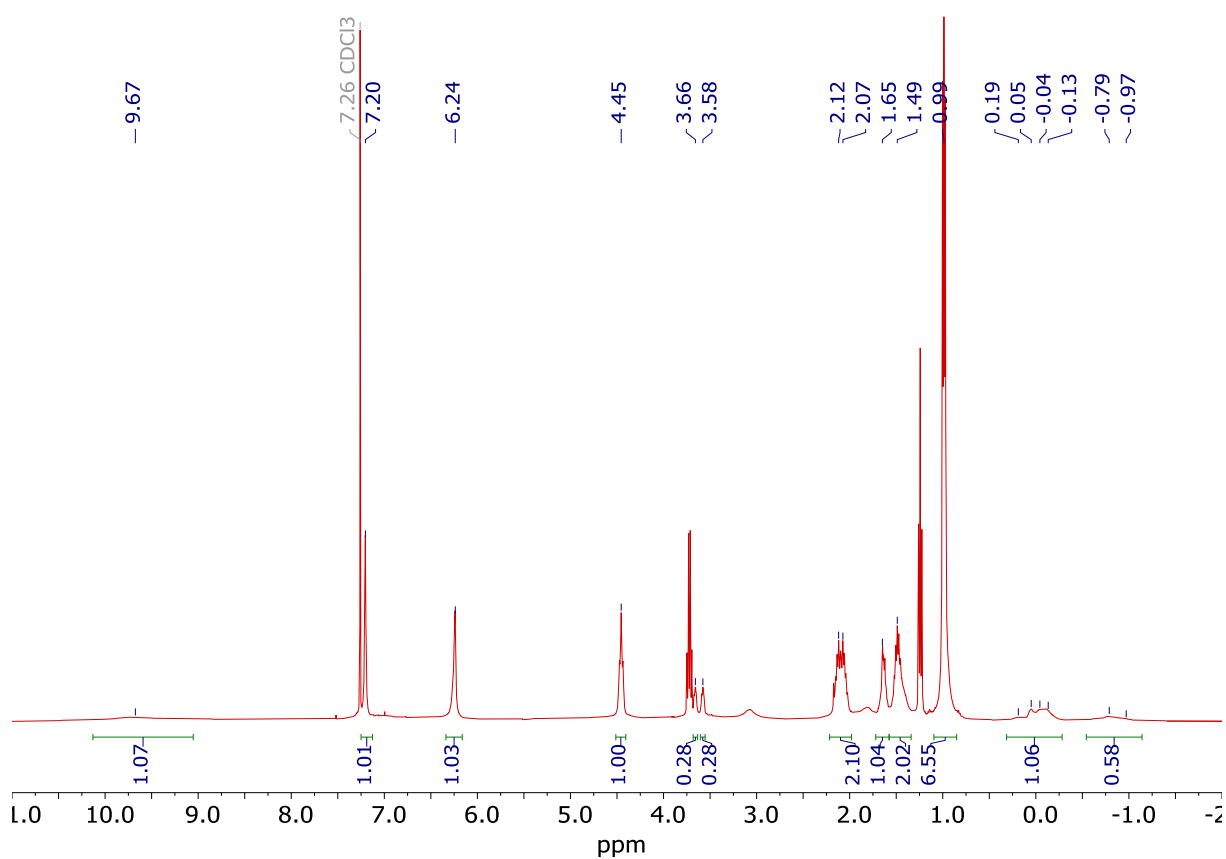

$^{13}\text{C}$  NMR in  $\text{DMSO-}d_6$

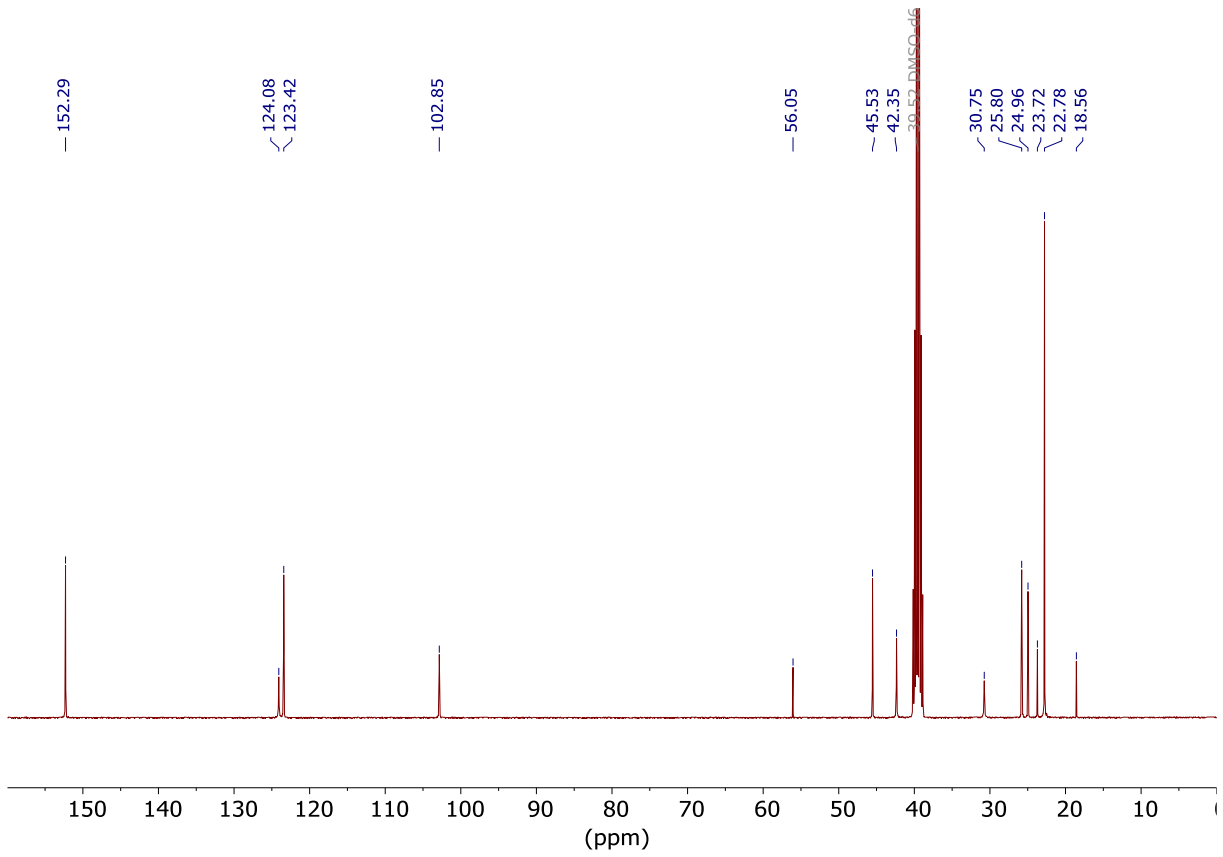

HSQC  $^{13}\text{C}$   $\text{DMSO-}d_6$

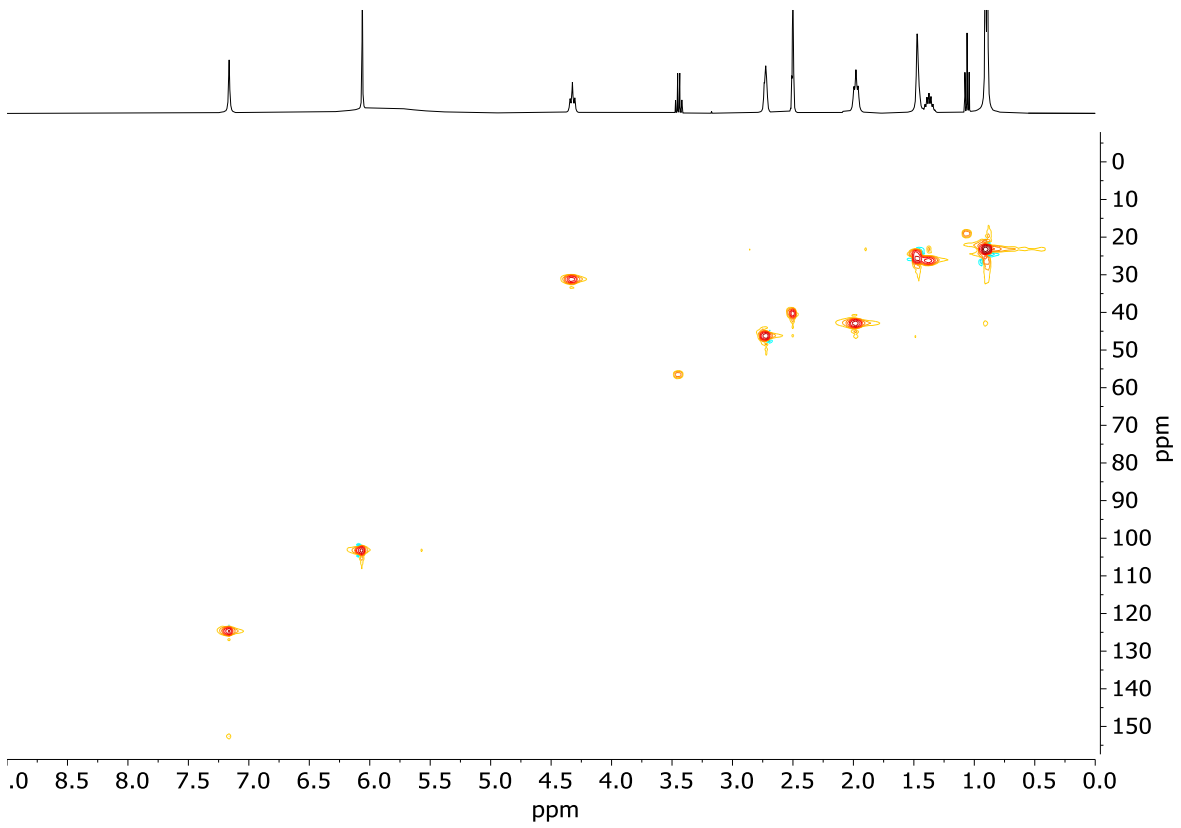

R[4]A:morpholine

<sup>1</sup>H NMR in DMSO

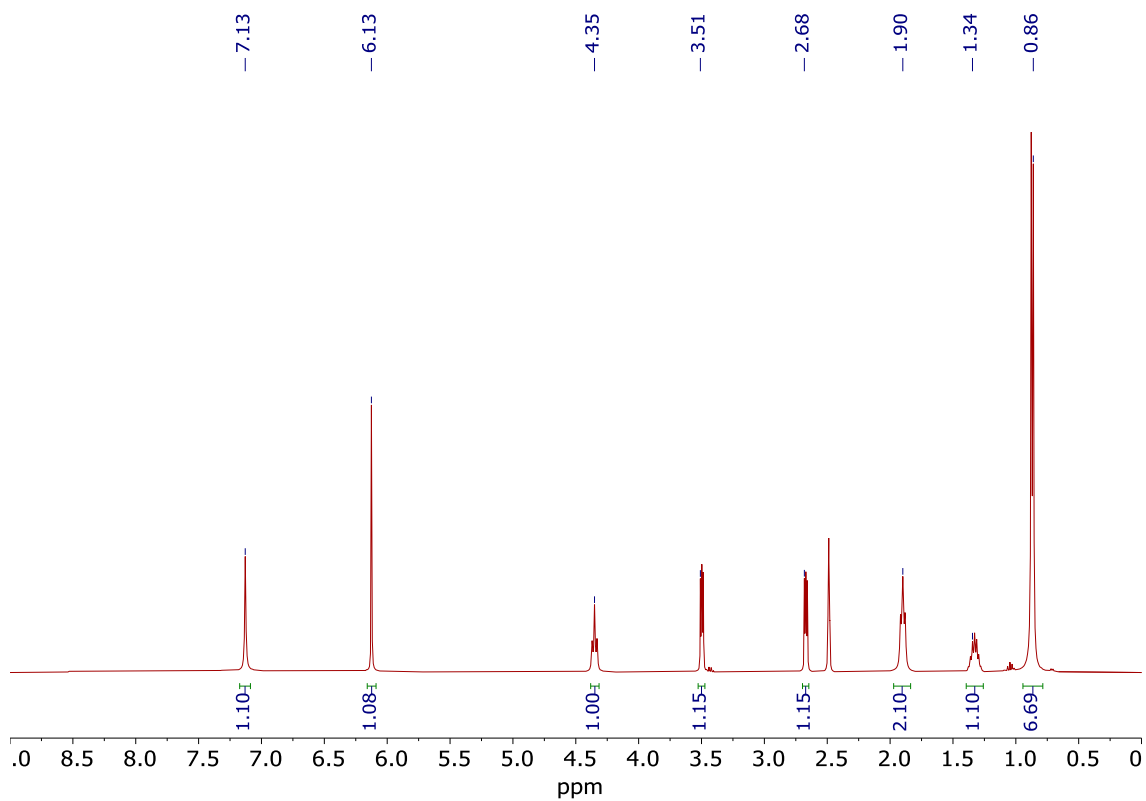

<sup>1</sup>H NMR in CDCl<sub>3</sub>

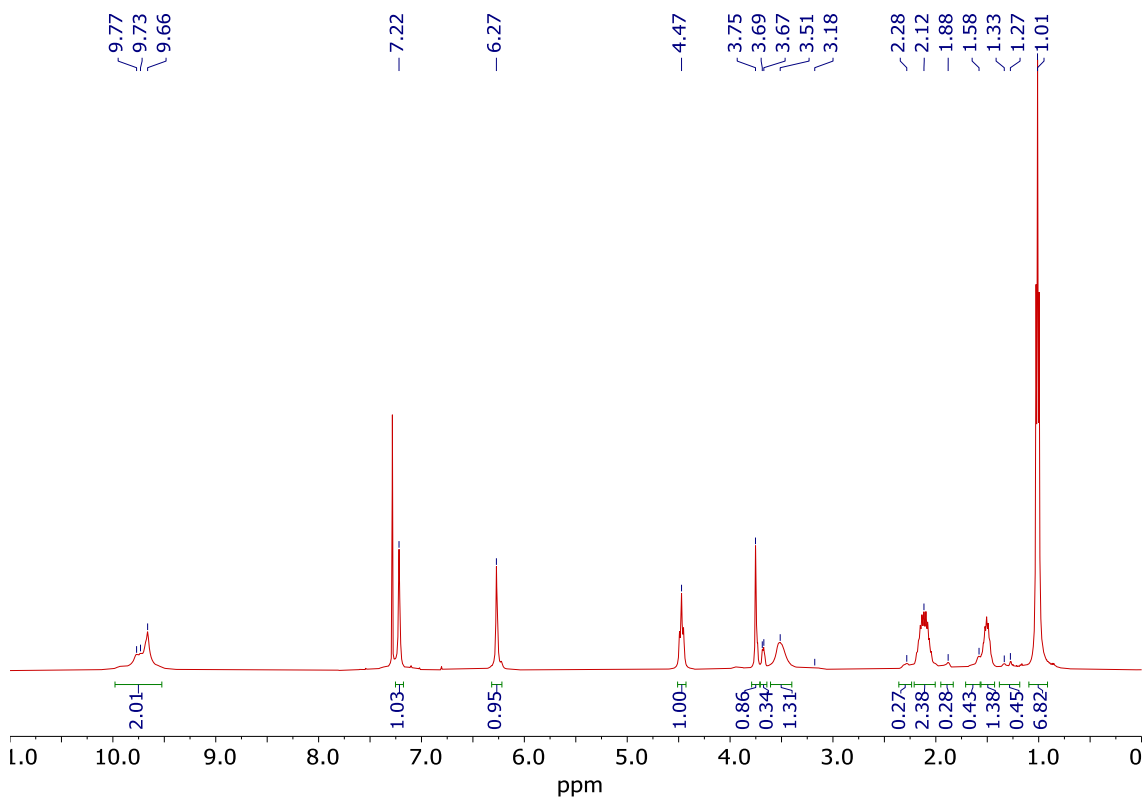

$^{13}\text{C}$  NMR in  $\text{DMSO-}d_6$

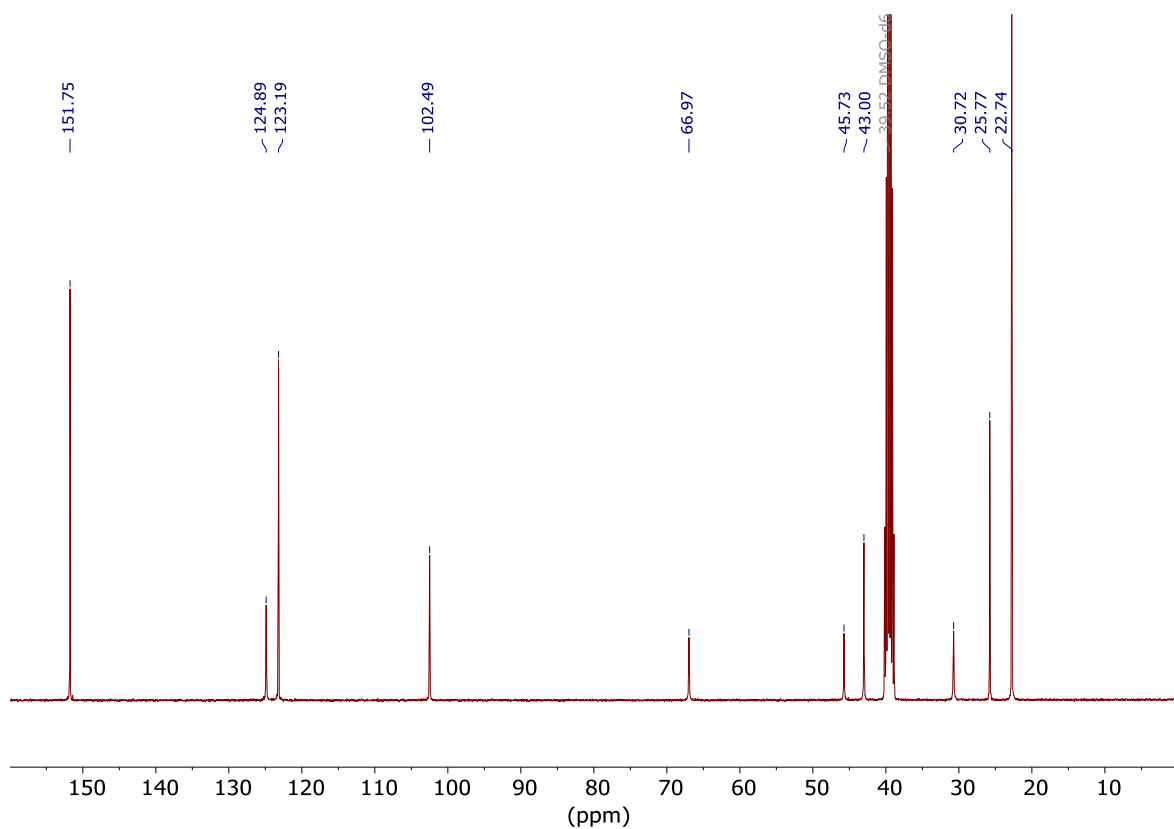

HSQC  $^{13}\text{C}$   $\text{DMSO-}d_6$

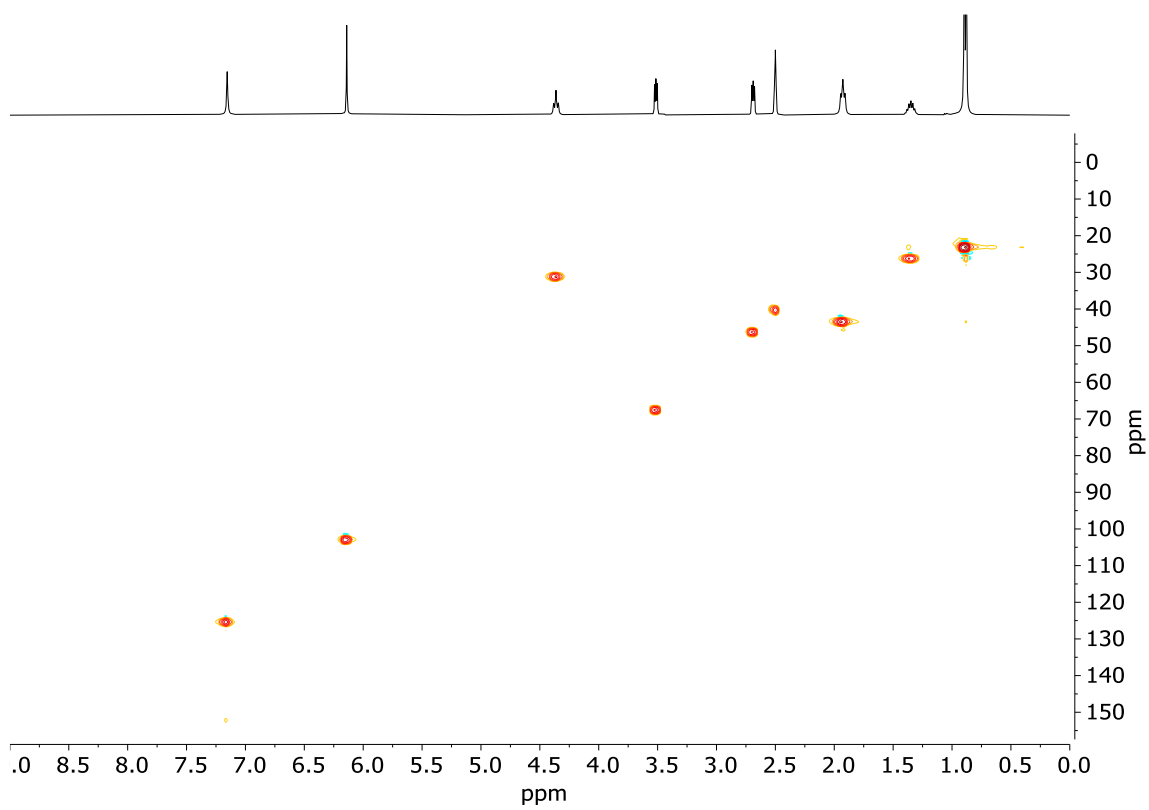

### R[4]A:1-methylpiperazine

$^1\text{H}$  NMR in DMSO

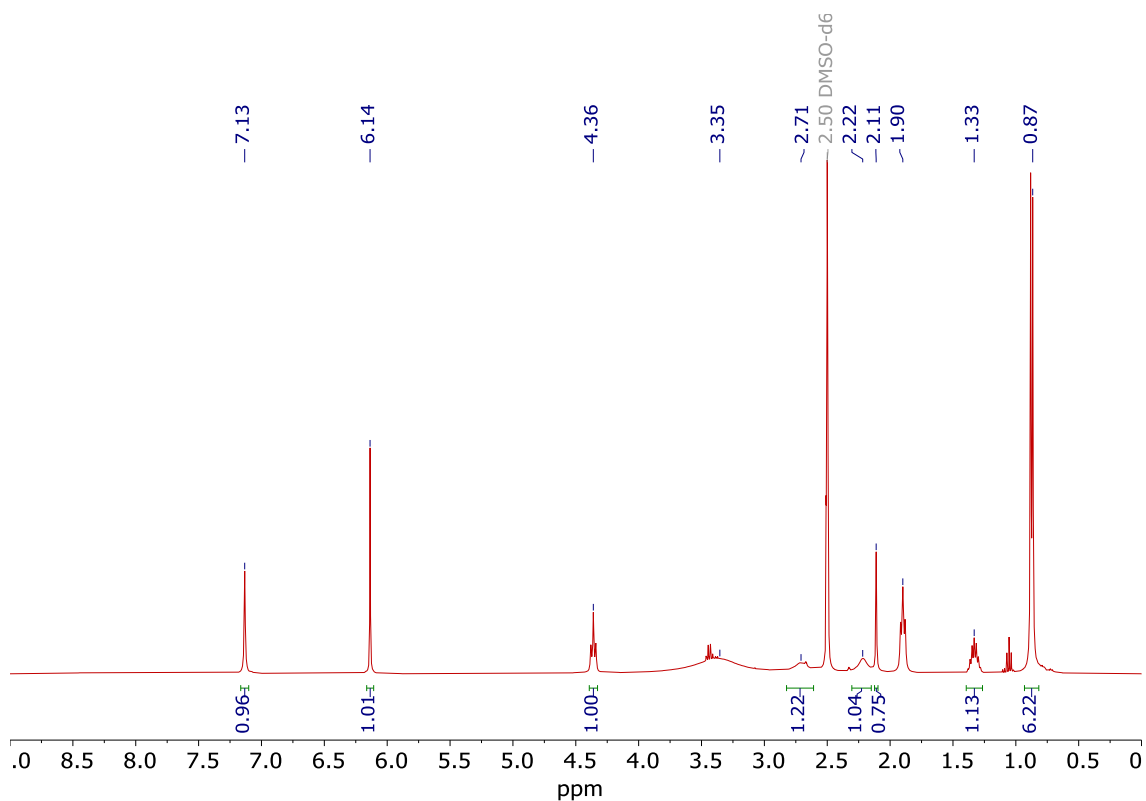

$^1\text{H}$  NMR in  $\text{CDCl}_3$

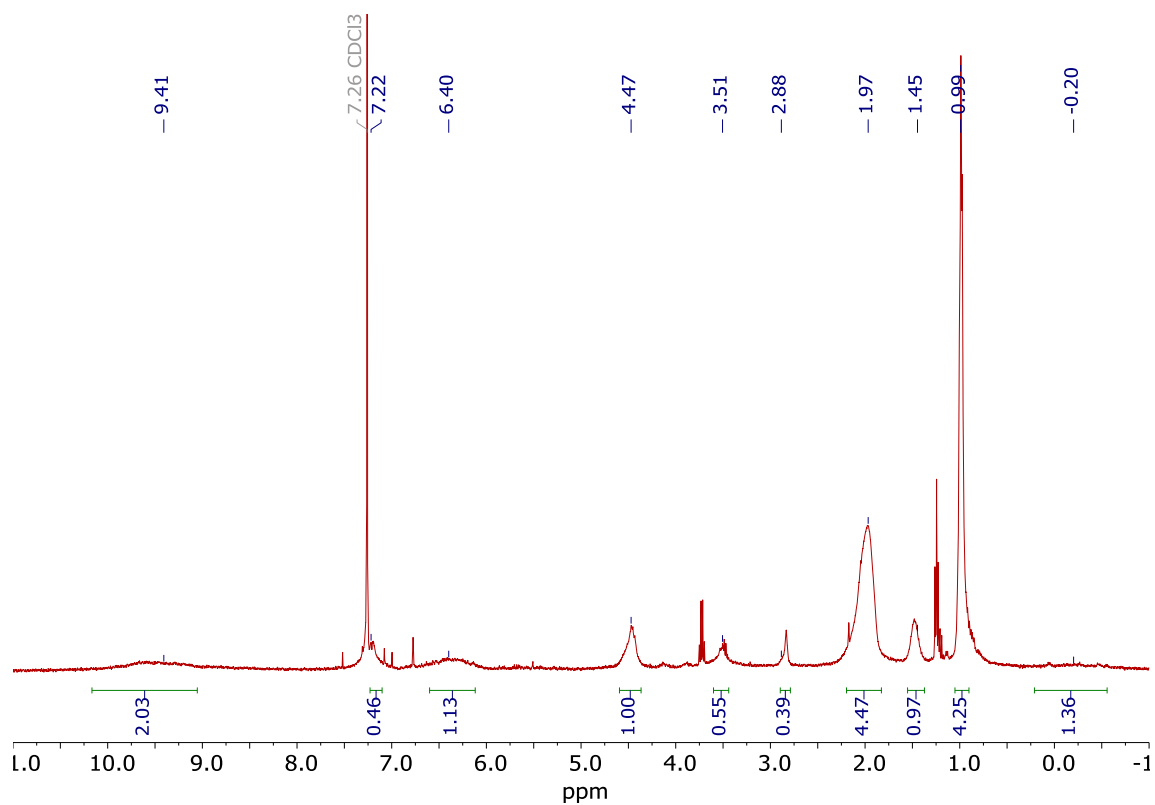

<sup>13</sup>C NMR in DMSO

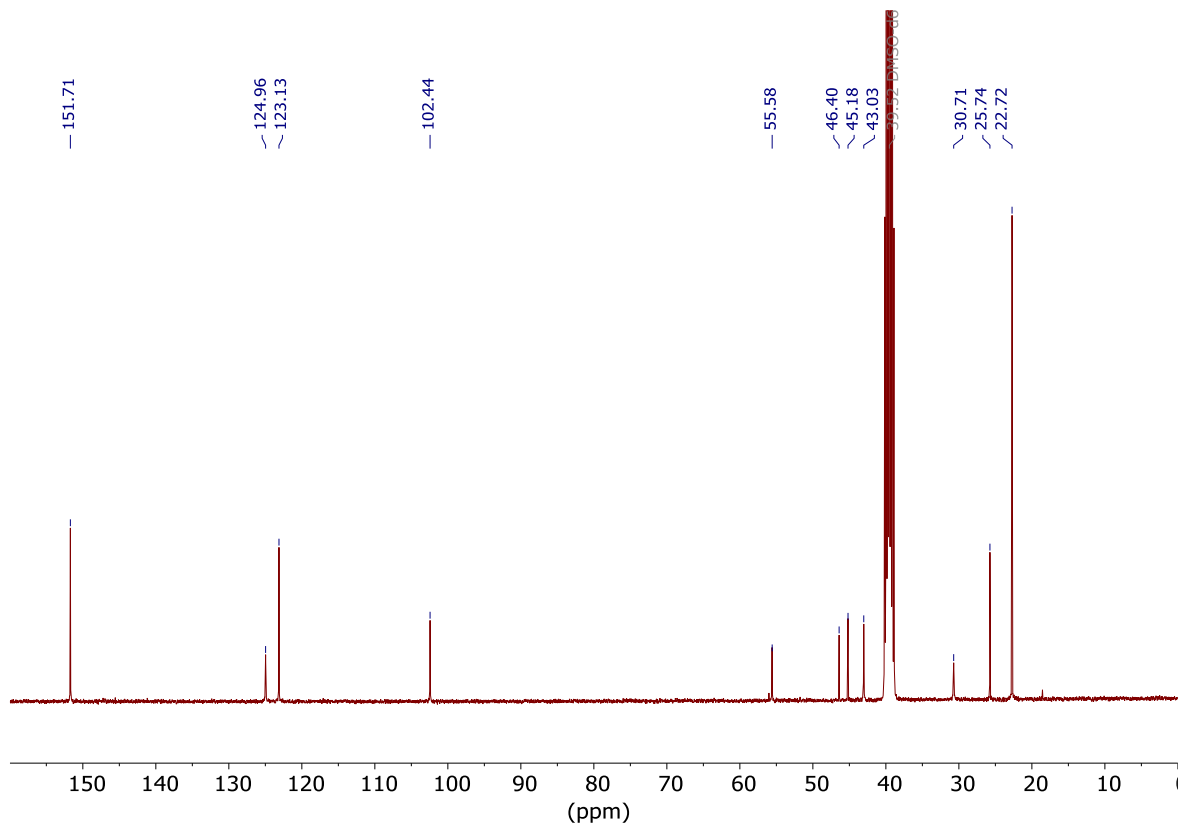

HSQC <sup>13</sup>C DMSO-d<sub>6</sub>

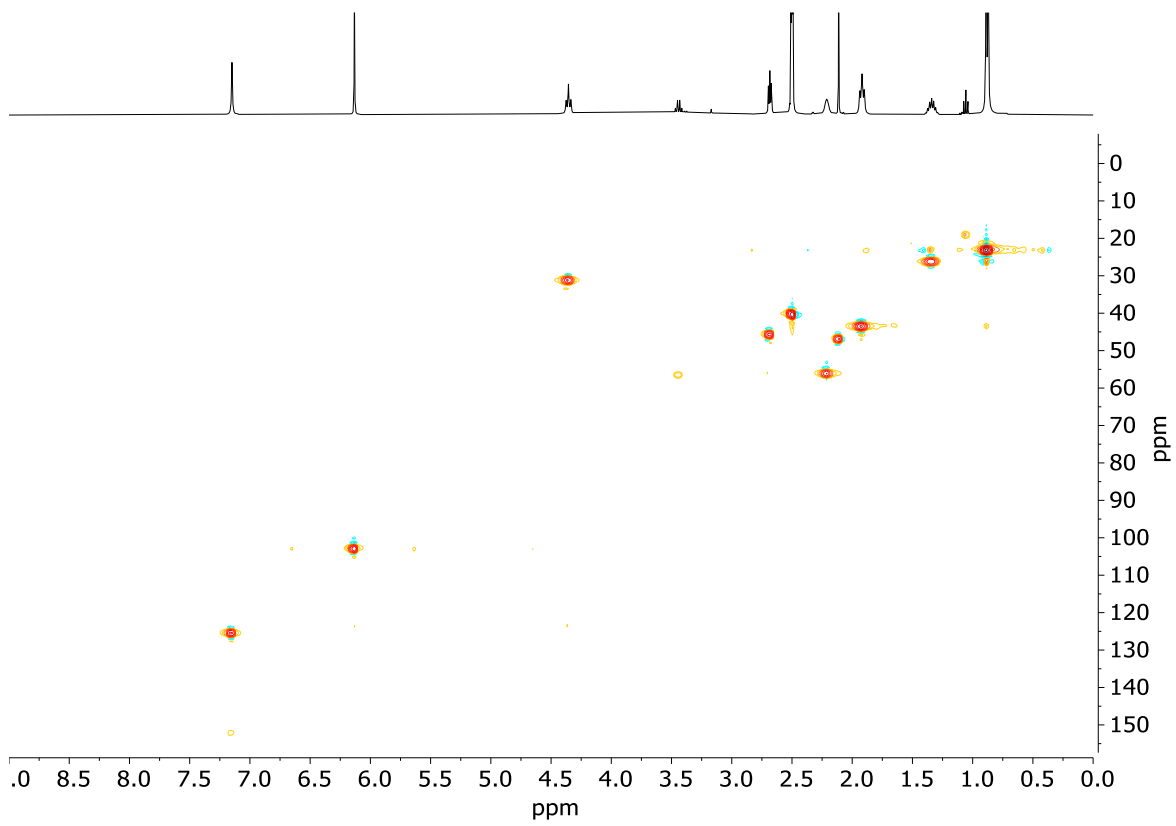

# R[4]A:dipropylamine

$^1\text{H}$  NMR in DMSO

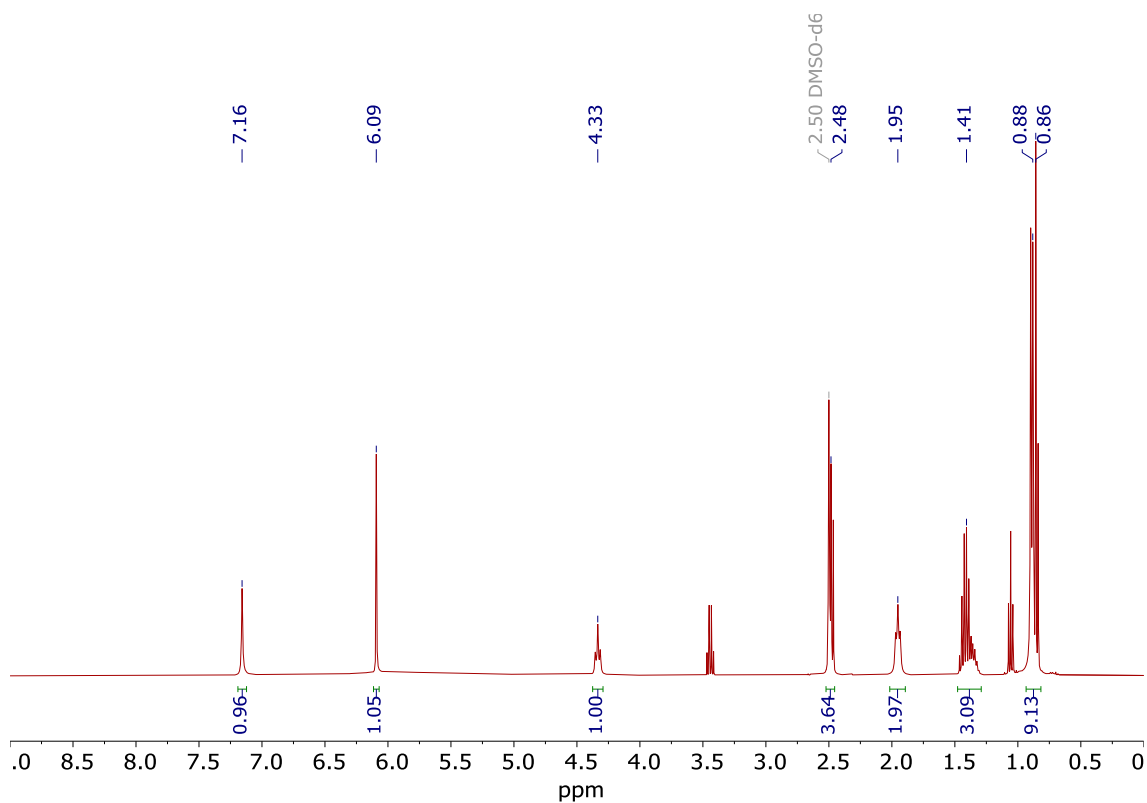

$^{13}\text{C}$  NMR in DMSO

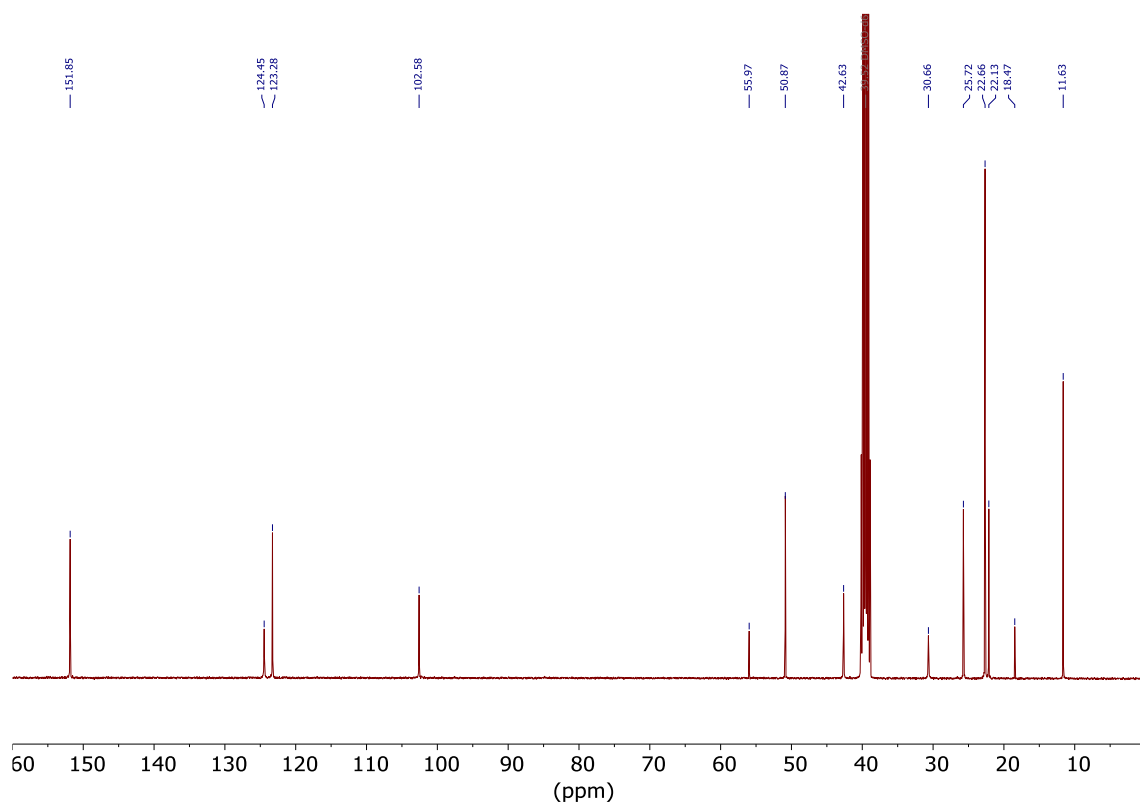



HSQC  $^{13}\text{C}$  DMSO- $d_6$

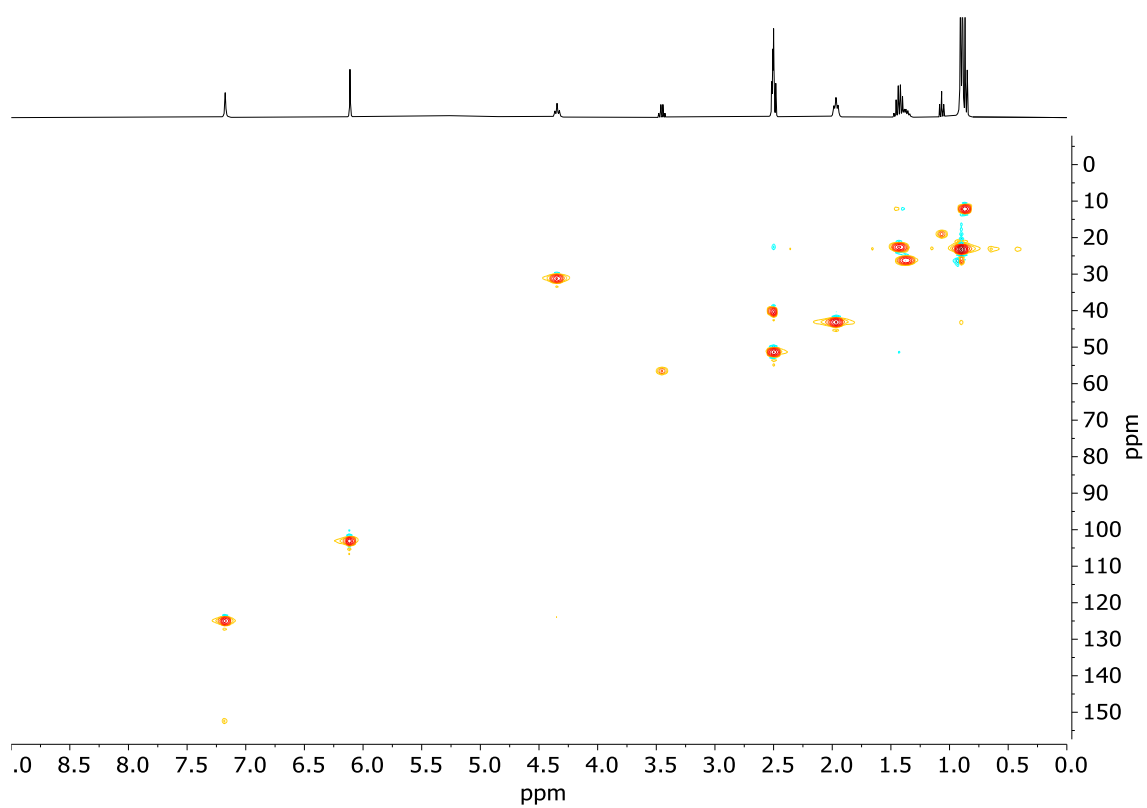

# R[4]A:diisopropylamine

$^1\text{H}$  NMR in DMSO

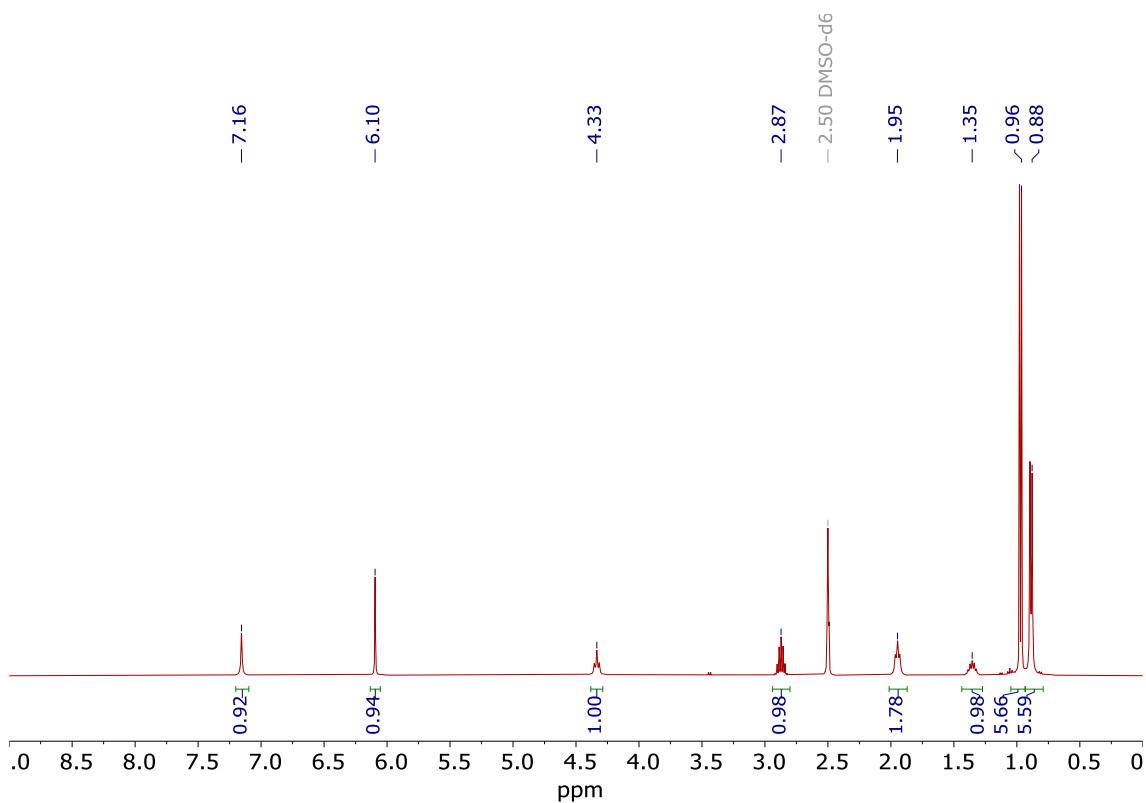

$^{13}\text{C}$  NMR in DMSO

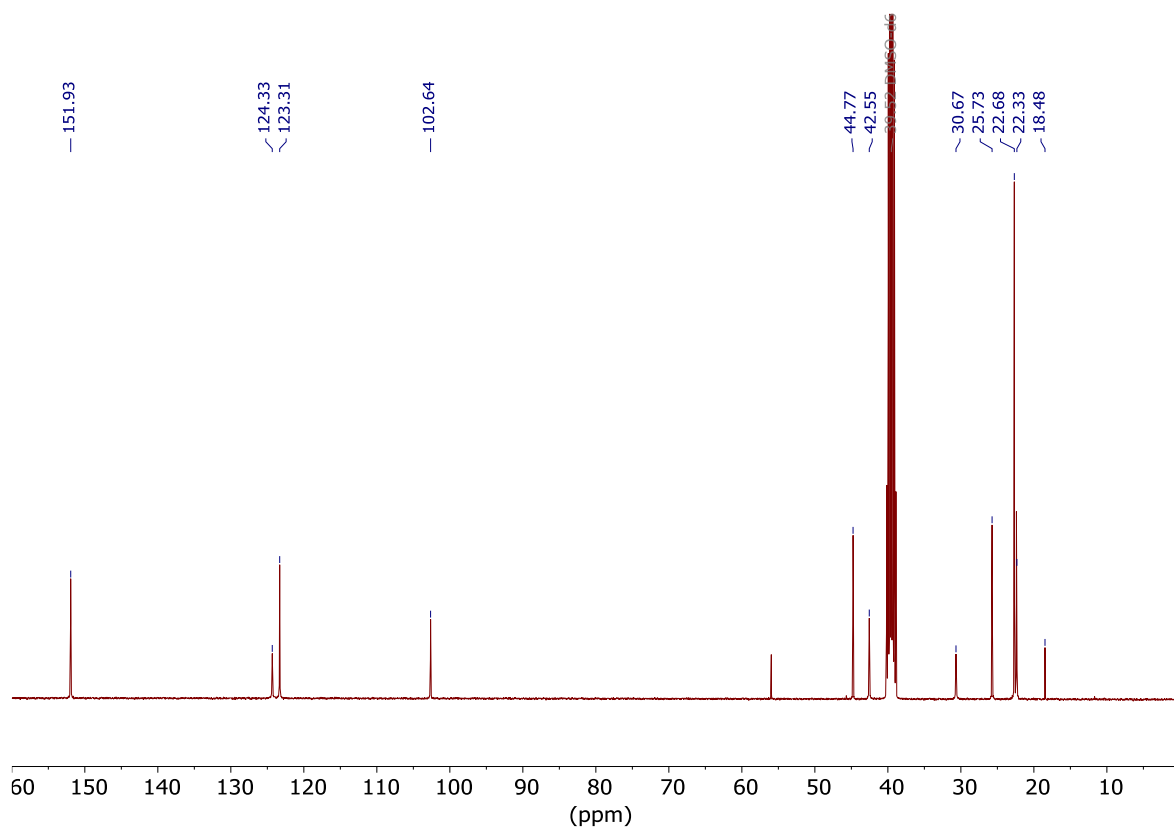

HSQC  $^{13}\text{C}$  DMSO- $d_6$

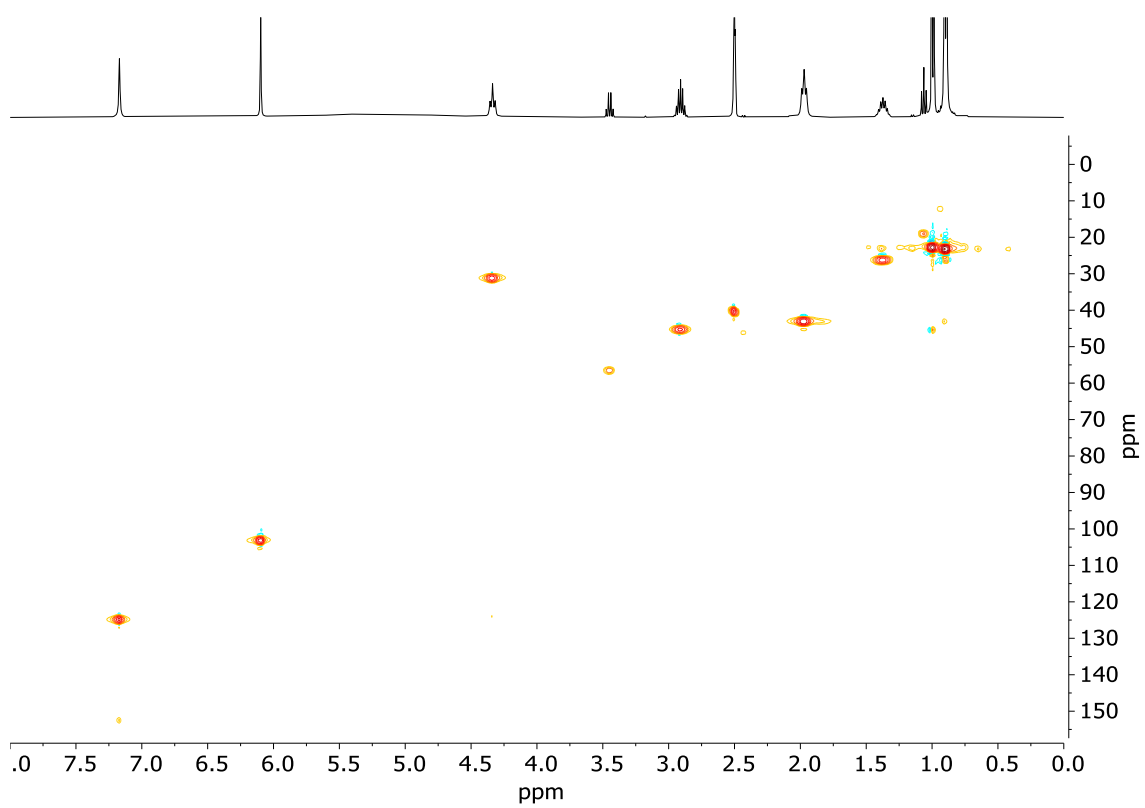

2. The xyz coordinates of the optimized complex structures calculated by the PBE0-D4/mTZVPP method in CHCl<sub>3</sub> and DMSO

R[4]A:dimethylamine

| CHCl <sub>3</sub> |                   |                   | DMSO              |   |                   |                   |                   |
|-------------------|-------------------|-------------------|-------------------|---|-------------------|-------------------|-------------------|
| C                 | -2.87994689139466 | -1.96761078395866 | 2.51130567321679  | C | -0.33578104570439 | -3.26241287341443 | 0.09857154007913  |
| C                 | -3.33327358405858 | -2.82926851771368 | 1.51636327078323  | C | -1.40350241630552 | -3.99560909176605 | -0.41149632292248 |
| C                 | -2.49929449591604 | -3.77259179376594 | 0.94240062398050  | C | -1.89885862785128 | -3.76810435970710 | -1.68464847428640 |
| C                 | -1.17838308186158 | -3.88519445759472 | 1.36297758861142  | C | -1.32514125402258 | -2.79399999979684 | -2.50001922203530 |
| C                 | -0.68795440218617 | -3.05319735806441 | 2.37769630547510  | C | -0.21439119239064 | -2.07082623855414 | -2.03813935170798 |
| C                 | -1.55309840341986 | -2.09893980876998 | 2.89697365415763  | C | 0.22333914526436  | -2.30870525771995 | -0.74221996206378 |
| O                 | -4.64382564073060 | -2.70875720595452 | 1.11913957823504  | O | -1.95862875422764 | -4.95898644041347 | -0.39772270365573 |
| O                 | -0.41978756241288 | -4.83472601636849 | 0.76359196602687  | O | -1.85963961018018 | -2.60636407558165 | -3.72311944189635 |
| C                 | 0.73104541960034  | -3.19987166233607 | 2.89481220719490  | C | 0.47230233500509  | -1.05657575439021 | -2.92845060500023 |
| C                 | 1.66490643779023  | -2.24222463353148 | 2.18633285711712  | C | -0.16784867484013 | 0.30747825089076  | -2.77666573133251 |
| C                 | 2.27270518384290  | -2.61079449930632 | 0.98258924276005  | C | -1.26730771886120 | 0.65004406314297  | -3.59145336203958 |
| C                 | 3.09015620984582  | -1.71249916852219 | 0.30991505885961  | C | -1.85359272265289 | 1.90836467039123  | -3.42179315956524 |
| C                 | 3.31352154228917  | -0.43622696311608 | 0.81365557701087  | C | -1.38815631730413 | 2.80892819542797  | -2.47105392060778 |
| C                 | 2.74660628993816  | -0.04806505175259 | 2.03229862387539  | C | -0.29445149293151 | 2.48623543139654  | -1.66107256898858 |
| C                 | 1.92112951909823  | -0.96753040299550 | 2.67016716204282  | C | 0.26859435019211  | 1.22467823256161  | -1.83465913666821 |
| O                 | 2.05614856910418  | -3.85612624725390 | 0.48270902603639  | O | -1.74040536093806 | -0.19629188559200 | -4.50552705608141 |
| C                 | 3.02320135441616  | 1.31580712910084  | 2.63847938325711  | C | 0.25954426981118  | 3.45196378395765  | -0.62926056559139 |
| C                 | 2.03369208816187  | 2.33323647529195  | 2.10383477969295  | C | -0.42691221065590 | 3.23084654173533  | 0.70557676952527  |
| C                 | 2.36693865487050  | 3.16491762311636  | 1.03752376713843  | C | -1.53451709072523 | 3.99278108077219  | 1.07334431359772  |
| C                 | 1.46267635485731  | 4.07310558387632  | 0.51730865800340  | C | -2.18803945443996 | 3.78395373984032  | 2.27499741349036  |
| C                 | 0.19378332797785  | 4.18987753152245  | 1.07290798777434  | C | -1.73286808388044 | 2.81160942987676  | 3.15898397872537  |
| C                 | -0.16795174726520 | 3.40550770615965  | 2.17375434219598  | C | -0.60536465118146 | 2.04461768715783  | 2.84424239251317  |
| C                 | 0.75787958932818  | 2.47512686925352  | 2.63099254126617  | C | -0.00906766417586 | 2.26138734196938  | 1.60671750086672  |
| O                 | 3.63209272183076  | 3.05222130606735  | 0.51383709189536  | O | -1.95723916960338 | 4.96402059169611  | 0.20058504899158  |
| O                 | -0.63045640919136 | 5.11295013253116  | 0.51354697922026  | O | -2.41796714520639 | 2.68922381473274  | 4.32586212678870  |
| C                 | -1.50115825550111 | 3.58934430046066  | 2.87667345513825  | C | -0.02289531044392 | 1.04352842062174  | 3.82732553419401  |
| C                 | -2.52236575638016 | 2.60016010189015  | 2.35199003228959  | C | -0.60112934522737 | -0.33880361146862 | 3.59187142035020  |
| C                 | -3.34720810110243 | 2.93464815775053  | 1.28032133604904  | C | -1.73102086514281 | -0.76308144594724 | 4.28918720867339  |
| C                 | -4.26438652280345 | 2.03688180150826  | 0.76441400714871  | C | -2.29441364631040 | -2.00699422321690 | 4.06679081122121  |
| C                 | -4.39600369560226 | 0.77174527053341  | 1.32671163601251  | C | -1.72217303876941 | -2.87733086833070 | 3.14515686468123  |
| C                 | -3.61653822357364 | 0.40888679715193  | 2.43030087968991  | C | -0.55965172898948 | -2.51172690473678 | 2.45811581320938  |
| C                 | -2.68045184898447 | 1.32945068908378  | 2.88607862976317  | C | -0.05656753926756 | -1.23455855391326 | 2.68195685218123  |
| O                 | -3.22479465148645 | 4.19575761877145  | 0.75008306199708  | O | -2.27010742517310 | 0.09640985093315  | 5.21385979308684  |
| O                 | -5.32720723442919 | -0.04260840320143 | 0.76867319087284  | O | -2.33075726648539 | -4.08192828744534 | 2.98863959208046  |
| C                 | -3.79975442514137 | -0.92920095608369 | 3.12153823155203  | C | 0.14474034998875  | -3.47641744072064 | 1.51998581566696  |
| C                 | 0.79621123451164  | -3.10460273313095 | 4.42105503249922  | C | 1.99035987284698  | -1.03733532048271 | -2.73658023184872 |
| C                 | 3.10278886812271  | 1.26345988310705  | 4.16998848019499  | C | 1.79250816993132  | 3.40531159421491  | -0.56009153404604 |
| C                 | -1.33394824468747 | 3.58728748545865  | 4.40309893167985  | C | 1.51175893864998  | 1.09366115486979  | 3.84460192320041  |
| C                 | -3.68227370571005 | -0.80443317201324 | 4.64767857009371  | C | 1.66925894593948  | -3.42245807188964 | 1.69391050250809  |
| C                 | 2.17360497088000  | -3.36262921918738 | 5.02932733178690  | C | 2.73346896675988  | -0.25587974104299 | -3.82120435706590 |
| C                 | 3.89816438785702  | 2.39180493401784  | 4.82758243411217  | C | 2.47004885798044  | 4.66379103160558  | -0.01700112066815 |
| C                 | -2.41193253657433 | 4.34236350106340  | 5.18126675123788  | C | 2.16730759689107  | 0.62676108331044  | 5.14400143158643  |
| C                 | -4.39687308255135 | -1.88938130842426 | 5.45368309384937  | C | 2.41692642890124  | -4.69653425809917 | 1.30008444337056  |
| O                 | 4.12880328910239  | 0.36325913845715  | 0.07627498215747  | O | -2.03442489027032 | 0.41036355989676  | -2.40199499342924 |
| C                 | 2.09561219123070  | -3.21260821842443 | 6.54407309418487  | C | 4.12536977695785  | 0.13494174003332  | -3.34130263601453 |
| C                 | 2.72828332777968  | -4.72996573634815 | 4.64997296597381  | C | 2.82180930827978  | -1.05033686007069 | -5.11945305160018 |
| C                 | -4.34444050552486 | -1.53057308916809 | 6.93498768432821  | C | 3.88632319637062  | -4.55829032817476 | 1.68329592158703  |
| C                 | -3.84265858162033 | -3.29219526997720 | 5.23515104155530  | C | 2.29120130483431  | -5.05652555246607 | -0.17528402136152 |
| C                 | -2.01840238341781 | 4.40747540039769  | 6.65277001688991  | C | 3.66720981369629  | 0.89422782921274  | 5.07600186412204  |
| C                 | -3.81017132729050 | 3.75345322461101  | 5.035757597293486 | C | 1.91326289323941  | -0.83855897596797 | 5.47737381363267  |
| C                 | 4.06159082760973  | 2.09070369792009  | 6.31360425121224  | C | 3.98217069766405  | 4.51368834944563  | -0.1442422527671  |
| C                 | 3.28434401969439  | 3.77443583330424  | 4.63948380054797  | C | 2.10006998840641  | 4.99735492016271  | 1.42317121938980  |
| H                 | -1.17750565253937 | -1.43388334449725 | 3.66620377328599  | H | 1.06425533036118  | -1.73138055942321 | -0.37539907886701 |
| H                 | -4.82513673897714 | -3.30911122878060 | 0.38696544381769  | H | -2.72539481641821 | -5.35261796872617 | -0.03559408681282 |
| H                 | 0.52505094078757  | -4.54884789743816 | 0.76399327958873  | H | -1.73700505049344 | -1.64190594836768 | -4.04370429797761 |
| H                 | 1.05486863377796  | -4.21194149481848 | 2.63974093449740  | H | 0.28301475023084  | -1.37235926021941 | -3.95945538137626 |
| H                 | 1.46167606997207  | -0.67607092734762 | 3.60802651989738  | H | 1.11187051206134  | 0.95765129979502  | -1.20661044734917 |
| H                 | 2.06706113551170  | -3.85286991440141 | -0.56225673029744 | H | -1.06985243386431 | 0.06088375898459  | -5.77323094309105 |
| H                 | 4.02029733357752  | 1.62168243160946  | 2.30405594877753  | H | 0.00986111039036  | 4.46520862458633  | -0.96098095604871 |
| H                 | 0.47687964657996  | 1.84863074568054  | 3.47091097008754  | H | 0.85455223737932  | 1.65893195467701  | 1.34688411125227  |
| H                 | 3.72442449128933  | 3.63084044567360  | -0.25166546015354 | H | -2.75366590892627 | 5.39304899831631  | 0.53622414447847  |
| H                 | -1.56390382514126 | 4.86289800935188  | 0.65030256065385  | H | -2.30935146200752 | 1.79352620558950  | 4.70148279946373  |
| H                 | -1.85992580420495 | 4.59233708733905  | 2.62443038699378  | H | -0.33555669960532 | 1.36098170621057  | 4.82764826045820  |
| H                 | -2.06376077556751 | 1.04743957441442  | 3.73169053203486  | H | 0.83301974335976  | -0.93759018893405 | 2.13748564961649  |
| H                 | -3.81015731879940 | 4.29368521986148  | -0.00937641837947 | H | -3.07428150393168 | -0.28001163077100 | 5.59153813614464  |
| H                 | -5.13912267546311 | -0.98059351937400 | 0.96145288606922  | H | -2.13782706141619 | -4.45536648601965 | 2.106271158861632 |
| H                 | -4.82928291201431 | -1.25011481953834 | 2.93281727877066  | H | -0.14854342447512 | -4.48782884687206 | 1.81963840846336  |

|   |                   |                   |                   |   |                   |                   |                   |
|---|-------------------|-------------------|-------------------|---|-------------------|-------------------|-------------------|
| H | 0.08566050140734  | -3.83402932777990 | 4.83012338251824  | H | 2.35782801069892  | -2.07099641874378 | -2.72566163439496 |
| H | 0.44887673808557  | -2.12432414085345 | 4.76357855905558  | H | 2.24560040698016  | -0.61890905518572 | -1.75793745436258 |
| H | 3.58447265591203  | 0.31710077022550  | 4.43882492547408  | H | 2.16005446589251  | 3.24459373331474  | -1.57931894585693 |
| H | 2.10236819356478  | 1.22919982697647  | 4.61661839110280  | H | 2.13509334344405  | 2.54109335651926  | 0.02000808861156  |
| H | -0.37173197500281 | 4.06121584790928  | 4.62477304221715  | H | 1.80648894095498  | 2.13572453239165  | 3.67998571561344  |
| H | -1.25816462225546 | 2.56577540514349  | 4.79204228370883  | H | 1.93428762608084  | 0.52757661312481  | 3.00680299786628  |
| H | -4.11780259876595 | 0.15997996820172  | 4.93066863096848  | H | 1.87284376289644  | -3.23332885955502 | 2.75340365439308  |
| H | -2.63260187542417 | -0.76357915159987 | 4.95944395805740  | H | 2.09680491038525  | -2.57291837857946 | 1.15039679523948  |
| H | 2.86307216217576  | -2.59944481042263 | 4.64788125589118  | H | 2.16987159784491  | 0.66560993097236  | -4.01692040880453 |
| H | 4.89747719132420  | 2.39879389373296  | 4.37064968716375  | H | 2.15621925703061  | 5.50471270292720  | -0.65094082330854 |
| H | -2.43557315876393 | 5.36925272142253  | 4.79067771691238  | H | 1.75023611711857  | 1.23653125017085  | 5.9575932088353   |
| H | -5.45044219137359 | -1.88788350122417 | 5.14147110288576  | H | 1.98897361051841  | -5.52070554948596 | 1.88769394270820  |
| H | 4.01478712361768  | 1.30404509719680  | 0.30553899093040  | H | -1.94042929241513 | 4.40422219648831  | -1.51486850550542 |
| H | 1.71467466732741  | -2.22595716367973 | 6.82544806573592  | H | 4.07213809211746  | 0.76808671628130  | -2.45012709039156 |
| H | 1.42504105153500  | -3.96496249395155 | 6.97396040781825  | H | 4.70912572881541  | -0.75641763590101 | -3.08541537880954 |
| H | 3.07890466776693  | -3.33933994217973 | 7.00605956501478  | H | 4.67373069824376  | 0.68224731423256  | -4.11390801710793 |
| H | 2.02912668448664  | -5.52422505911872 | 4.93480641096769  | H | 3.44393736757453  | -1.94096899873587 | -4.97770979004591 |
| H | 2.91360047599817  | -4.81380903118214 | 3.57592923615452  | H | 1.83939070129494  | -1.38617552388484 | -5.46324842806266 |
| H | 3.67617454884255  | -4.91932701394529 | 5.16197619079015  | H | 3.26949470482052  | -0.45259923512249 | -5.91893751190505 |
| H | -3.30787324067583 | -1.51760136899405 | 7.28961617415610  | H | 4.35500427330149  | -3.74531466264181 | 1.11766631189157  |
| H | -4.77456472136987 | -0.54239574106693 | 7.12330003019045  | H | 4.00202225705153  | -4.33561162056417 | 2.74824139230991  |
| H | -4.89306325333532 | -2.25998232440122 | 7.53758182787529  | H | 4.43901864128299  | -5.47705133619558 | 1.46660995719086  |
| H | -3.94932918363361 | -3.32266457414763 | 4.20038494421033  | H | 1.25520181063536  | -5.23879528014851 | -0.46786857295628 |
| H | -2.77706364305150 | -3.33241193977013 | 5.48582634865982  | H | 2.67533685512783  | -4.24644212636898 | -0.80483840222406 |
| H | -4.36520656136752 | -4.01009517962877 | 5.87448994470006  | H | 2.86996479957397  | -5.95835822442787 | -0.39708189726457 |
| H | -1.98352707834668 | 3.40165112731939  | 7.08590278927731  | H | 4.12544681266906  | 0.30523097562942  | 4.27369732837154  |
| H | -1.03193321455596 | 4.86224039166491  | 6.78283062945403  | H | 3.87670441433551  | 1.94979359404225  | 4.7890529345906   |
| H | -2.74045488754048 | 4.99282174359907  | 7.22913267704559  | H | 4.15887819535007  | 0.61939867673587  | 6.01360614424710  |
| H | -4.16008104471293 | 3.77259129836180  | 4.00193434587368  | H | 0.85260234957239  | -1.05092765807293 | 5.62487534380125  |
| H | -3.82913076950025 | 2.71071721077074  | 5.37078082473734  | H | 2.27108725980994  | -1.48686825750098 | 4.67005278969444  |
| H | -4.52424752150086 | 4.31545503564424  | 5.64514844827914  | H | 2.44421807766420  | -1.11595941527099 | 6.39310492378779  |
| H | 3.08571156583893  | 2.07817312559336  | 6.81158261516001  | H | 4.33758811185756  | 3.68522864591911  | 0.47864306340853  |
| H | 4.53308725342390  | 1.11689031538319  | 6.47545023989500  | H | 4.27900535774443  | 4.30742395630195  | -1.17703919714817 |
| H | 4.67556371152313  | 2.85093406053641  | 6.80486371175597  | H | 4.49750467366243  | 5.42132552048725  | 0.18297768393173  |
| H | 3.24321793272753  | 4.07008101801677  | 3.58964882437961  | H | 1.03542913601513  | 5.21003626694951  | 1.53795209014643  |
| H | 2.26083589481013  | 3.79996569685234  | 5.02922747498444  | H | 2.34378988657527  | 4.16172833284573  | 2.08841071017239  |
| H | 3.86859428399450  | 4.52572554148359  | 5.17935192867922  | H | 2.65854647306675  | 5.87443149581373  | 1.76419282274927  |
| H | -2.86094472229882 | -4.42950988444746 | 0.15727339043780  | H | -2.74726208254155 | -4.33643046105139 | -2.05429911623247 |
| H | 3.57321118217118  | -1.99854284791499 | -0.61724714999057 | H | -2.70384670059752 | 2.18365551343217  | -4.03779376125384 |
| H | 1.72875637005416  | 4.70062936244786  | -0.32765329887654 | H | -3.05864952386177 | 4.37572183581327  | 2.54117547940601  |
| H | -4.88988385322525 | 2.30606405856608  | -0.08110767922979 | H | -3.18642772695562 | -2.31393410994369 | 4.60426018235470  |
| N | 1.77053593570723  | -3.90613797093559 | -2.09198750197819 | N | -0.56744485600014 | 0.25169812575444  | -6.73953154900436 |
| C | 2.89113234338114  | -3.61929549018655 | -2.98141918665644 | C | -1.15433638281576 | 1.44726824868314  | -7.36870177112661 |
| C | 0.62916159722827  | -3.02390096089563 | -2.32537193455765 | C | -0.67084648458717 | -0.95952477585697 | -7.57139821553222 |
| H | 3.24447442545647  | -2.60159009865442 | -2.80119389673359 | H | -2.21580832450595 | 1.26568515724359  | -7.53568992180870 |
| H | 2.61167142637242  | -3.70072392234098 | -4.03930770570024 | H | -0.65907275071767 | 1.64658650198990  | -8.31969010703280 |
| H | 0.92141492362093  | -1.99560389105642 | -2.09965555780573 | H | -1.72581506247899 | -1.17067592969183 | -7.74513570526767 |
| H | -0.18786143777288 | -3.30358375323680 | -1.65748782515978 | H | -0.21215785298511 | -1.79179319161936 | -7.03819170454322 |
| H | 1.47445526319606  | -4.86624199670005 | -2.24130916039383 | H | 0.41300772611376  | 0.4319282559467   | -6.52678026349669 |
| H | 3.70977547956113  | -4.31166466444912 | -2.77699566881905 | H | -1.02823071769740 | 2.29522832910899  | -6.69653215710594 |
| H | 0.27623767566079  | -3.06630115546266 | -3.36302715444211 | H | -0.16359751205919 | -0.80016870199174 | -8.52331493003369 |

## R[4]A:diethylamine

| CHCl <sub>3</sub> |                   |                   | DMSO              |   |                   |                   |                   |
|-------------------|-------------------|-------------------|-------------------|---|-------------------|-------------------|-------------------|
| C                 | -2.67346074724655 | -2.18645726997810 | 2.46062910490394  | C | -0.17029818147080 | -3.3343480529257  | 0.13344919705838  |
| C                 | -3.11777839975245 | -3.16803252026159 | 1.57950092029292  | C | -1.18644006025595 | -4.12326589237622 | -0.39759889725719 |
| C                 | -2.27493852485472 | -4.16658349704245 | 1.12490180851704  | C | -1.64564928119668 | -3.94047146126942 | -1.69148778446452 |
| C                 | -0.95347463305956 | -4.20770915045062 | 1.55334422665447  | C | -1.08835698208510 | -2.95518961408251 | -2.50508743045993 |
| C                 | -0.47628302372064 | -3.26063249744402 | 2.46700202076469  | C | -0.03134905783031 | -2.16992555159032 | -2.01743037204144 |
| C                 | -1.34931457986129 | -2.25872420543774 | 2.86821356144011  | C | 0.37145927234778  | -2.36769099226871 | -0.70377873329151 |
| O                 | -4.42562809691485 | -1.73275647627316 | 1.16197876384666  | O | -1.72838850996354 | -5.09341704734346 | 0.41263294586721  |
| O                 | -0.16313013239669 | -5.19011358971866 | 1.05272024395909  | O | -1.58548351074687 | -2.81271735323339 | -3.74933475514357 |
| C                 | 0.93604261215575  | -3.33452801844322 | 3.01234775238997  | C | 0.63371458628902  | -1.13253265526870 | -2.89955979550967 |
| C                 | 1.84168288945990  | -2.33989495708357 | 2.31992278533894  | C | -0.07473119578374 | 0.19954500284212  | -2.78019834701748 |
| C                 | 2.37260907588807  | -2.64091327519235 | 1.06348000511973  | C | -1.18184862011498 | 0.47038620415137  | -3.61176266363365 |
| C                 | 3.20101007558944  | -1.73275647627316 | 0.42048130682298  | C | -1.83520058338400 | 1.69886620917174  | -3.46679401072829 |
| C                 | 3.48055822117007  | -0.49508798998296 | 0.98534023596451  | C | -1.42005664768560 | 2.64122595945093  | -2.53421908715717 |
| C                 | 2.94960408800872  | -0.15331003263125 | 2.23435931255065  | C | -0.31481781574647 | 2.39253244327376  | -1.71386905870267 |
| C                 | 2.14057521000524  | -1.09623300728052 | 2.85996964482152  | C | 0.31088789523904  | 1.15717477445466  | -1.85688433727011 |
| O                 | 2.05982784742819  | -3.82010993361910 | 0.45746542028865  | O | -1.59467206421256 | -0.40849437206184 | -4.51963732734018 |
| C                 | 3.22611749180166  | 1.20222532120043  | 2.85958999014187  | C | 0.18151589793961  | 3.40462922019430  | -0.69806310118999 |
| C                 | 2.31594071507587  | 2.23879089186258  | 2.22642413998741  | C | -0.51929403000682 | 3.18409654712977  | 0.62957113522157  |
| C                 | 2.77930935593488  | 3.10151456999793  | 1.23569471406507  | C | -1.65515611817176 | 3.91739347137384  | 0.96797100705141  |
| C                 | 1.94011411883407  | 4.01131579906971  | 0.61764160848118  | C | -2.32246112980159 | 3.70533590406598  | 2.16139265869358  |
| C                 | 0.60665684333688  | 4.09811762633789  | 0.99873035329678  | C | -1.85380156482724 | 2.75902444216223  | 3.06623413386217  |
| C                 | 0.11302760866967  | 3.28814513771127  | 2.02668508549401  | C | -0.69922359198308 | 2.02113865125016  | 2.78097810623169  |
| C                 | 0.98009810959273  | 2.35590580389725  | 2.58337667703963  | C | -0.08833469062113 | 2.23914199379192  | 1.55078751206607  |
| O                 | 4.10373290931307  | 3.00645458405950  | 0.88116428730868  | O | -2.09250572442721 | 4.86246212590104  | 0.07362943091400  |
| O                 | -0.15906040303307 | 5.01378312085947  | 0.34786447910084  | O | -2.55450303285252 | 2.63258102424373  | 4.22345961927446  |
| C                 | -1.29908733053487 | 3.44727217343186  | 2.56029507395438  | C | -0.10341391723209 | 1.05259312558017  | 3.78884181090528  |
| C                 | -2.20982660776736 | 2.37678105120052  | 1.99474236953319  | C | -0.62737746343454 | -0.35283442214768 | 3.56040548997453  |
| C                 | -2.83418663799980 | 2.56673616899253  | 0.76357964388768  | C | -1.76307396566392 | -0.80221088484812 | 4.23222886699356  |
| C                 | -3.65687355215355 | 1.60137283871884  | 0.21128135646027  | C | -2.28172655355538 | -2.06624603189224 | 4.01447781148263  |
| C                 | -3.89257599129212 | 0.41146240827736  | 0.89106218890074  | C | -1.65600617247198 | -2.93266313955036 | 3.12466332708624  |
| C                 | -3.30816618939241 | 0.19024977175151  | 2.14268978839229  | C | -0.48388324835649 | -2.54290269987839 | 2.46861341115532  |
| C                 | -2.46265204701584 | 1.17504084977999  | 2.64006628649573  | C | -0.02709149802520 | -1.24673739979153 | 2.68423366381388  |
| O                 | -2.61334536537303 | 3.75348169952317  | 0.11128236405286  | O | -2.35371208303902 | 0.05278387022077  | 5.12907974178666  |
| O                 | -4.72412375021051 | -0.47073163285154 | 0.28272200916032  | O | -2.22391029348833 | -4.15724223695619 | 2.96895192304114  |
| C                 | -3.59383210884192 | -1.07648880336103 | 2.92655009240699  | C | 0.27646399290316  | -3.50333873585900 | 1.57145743648977  |
| C                 | 0.94518022370259  | -3.22828320711275 | 4.53926446205231  | C | 2.14160102987441  | -1.04553517683421 | -2.65737819202171 |
| C                 | 3.16176835631337  | 1.17152842955696  | 4.39148887163440  | C | 1.71348072166739  | 3.42284294776105  | -0.60227933333147 |
| C                 | -1.29593421978102 | 3.55832054425117  | 4.09231401047816  | C | 1.42769810130584  | 1.15923149112402  | 3.83880695751296  |
| C                 | -3.56882021480372 | -0.84410235586271 | 4.44247076906663  | C | 1.79313697360824  | -3.39575795719306 | 1.78594536165075  |
| C                 | 2.30033801730358  | -3.46538124178962 | 5.20424881358999  | C | 2.89704655268392  | -0.17717716847347 | -3.66231044570631 |
| C                 | 3.89628052087347  | 2.30469686634890  | 5.10888036035925  | C | 2.32850451154416  | 4.71849923416741  | -0.07309503182393 |
| C                 | -2.47381851413855 | 4.32289436108765  | 4.69741547589285  | C | 2.06824149111868  | 0.74307947556679  | 5.16323352610910  |
| C                 | -4.34301308802755 | -1.86466542933817 | 5.27773794263117  | C | 2.59109723266858  | -4.65253215284563 | 1.43196125120727  |
| O                 | 4.29718502201650  | 0.31507671557483  | 0.26309401426520  | O | -2.12797671640792 | 3.80911995018739  | -2.49415467391386 |
| C                 | 2.17280733393688  | -3.25341951955125 | 6.70807640566181  | C | 4.31901871937951  | 0.06936802064475  | -3.17278689530027 |
| C                 | 2.85568579106322  | -4.85166033260676 | 4.90117167391062  | C | 2.91064429916239  | -0.79579307573179 | -5.05458968516658 |
| C                 | -4.43577065384842 | -1.36674997280823 | 6.71626785762787  | C | 4.04113563183845  | -4.46826418099968 | 1.86607352701634  |
| C                 | -3.74688024432680 | -3.26740155018515 | 5.24813390895275  | C | 2.52972310164548  | -5.02865951362842 | -0.04370112370086 |
| C                 | -2.25067443528553 | 4.49026838016270  | 6.19644821214627  | C | 3.55916695361337  | 1.06158436465043  | 5.12375513876621  |
| C                 | -3.83227999662479 | 3.68362394146017  | 4.43677601325848  | C | 1.85545147899843  | -0.72244064622262 | 5.52308844657845  |
| C                 | 3.94678240517645  | 2.00156600201734  | 6.60286597281062  | C | 3.84707023132115  | 4.63681956123615  | -0.18604226718554 |
| C                 | 3.28705252447847  | 3.68299582276556  | 4.87790828205179  | C | 1.93076907079968  | 5.05520510208521  | 1.35899145980106  |
| H                 | -0.97924611120418 | -1.49807914011487 | 3.54761202780881  | H | 1.16991359395332  | -1.74600438638566 | -0.31553977338789 |
| H                 | -4.59710530835747 | -3.77987668965137 | 0.50159821357826  | H | -2.46081204490567 | -5.52981901219300 | -0.03877127415298 |
| H                 | 0.74178538322996  | -4.81339522374050 | 0.94090428105544  | H | -1.51341086853236 | -1.83957706777339 | -4.06937232167523 |
| H                 | 1.31340934925697  | -4.33127665734622 | 2.77195928983379  | H | 0.49027023813938  | -1.46788015459395 | -3.93119946693932 |
| H                 | 1.72343876780140  | -0.84843842854449 | 3.82867019332990  | H | 1.16438974087075  | 0.94699759321721  | -1.22106727858003 |
| H                 | 1.77234891124308  | -3.63515909806789 | -0.53395573574668 | H | -1.07406331705383 | -0.12016842019155 | -5.89326670848506 |
| H                 | 4.25868239923690  | 1.47271406553154  | 2.61277892699941  | H | -0.10347807183755 | 4.39873815522488  | -1.05781686210518 |
| H                 | 0.59687901859600  | 1.70174646949141  | 3.36018064559794  | H | 0.79701829293584  | 1.65899512716603  | 1.31361190739846  |
| H                 | 4.28892089097875  | 3.59010846700935  | 0.13615746027138  | H | -2.90754393089214 | 5.27132031865185  | 0.38917229758803  |
| H                 | -1.07864808014245 | 4.69170630694547  | 0.30723867590074  | H | -2.43120093678278 | 1.74270408079848  | 4.60840302274067  |
| H                 | -1.67296943573945 | 4.41138657039213  | 2.20042713979336  | H | -0.44961656132270 | 1.37075727211504  | 4.77783546662015  |
| H                 | -2.00337054977103 | 1.00403123095373  | 3.60580645944271  | H | 0.86955858065584  | -0.93249636705408 | 2.16183559549937  |
| H                 | -3.07433898318055 | 3.75869321671851  | -0.73497517251337 | H | -3.15848979938338 | -0.34165594116081 | 5.48649476439378  |
| H                 | -4.67150399163845 | -1.36070917873776 | 0.67732676027991  | H | -1.98796479668857 | -4.54365515878938 | 2.10288346308719  |

|   |                   |                   |                   |   |                   |                   |                   |
|---|-------------------|-------------------|-------------------|---|-------------------|-------------------|-------------------|
| H | -4.62063611995896 | -1.37708030106028 | 2.69336532126630  | H | 0.00722684815932  | -4.51719715785873 | 1.88489343702992  |
| H | 0.23097623040402  | -3.96630592474974 | 4.92571469307477  | H | 2.55714900308102  | -2.06110717569858 | -2.68153881585400 |
| H | 0.56406139236146  | -2.25168139136436 | 4.85671360317896  | H | 2.34417169447671  | -0.66407735485494 | -1.65145428126475 |
| H | 3.61165290503878  | -0.22730648296340 | 4.71744657280420  | H | 2.1044055558620   | 3.25794162085308  | -1.61220888146116 |
| H | 2.12203276084391  | 1.14746535416531  | 4.73791482900894  | H | 2.08117392588267  | 2.58482466953444  | 0.00067747131656  |
| H | -0.37959476320739 | 4.08697987902576  | 4.37520840107961  | H | 1.68857782019068  | 2.20806276114451  | 3.66087410448452  |
| H | -1.22367917438883 | 2.57155423695656  | 4.56292016550850  | H | 1.89062356980734  | 0.59353100018072  | 3.02286125794626  |
| H | -4.01022389861765 | 0.14087303776344  | 4.62935298367150  | H | 1.96008784474718  | -3.18656035796444 | 2.84770838939049  |
| H | -2.53875222511858 | -0.79071019648401 | 4.81364250582492  | H | 2.20819998153881  | -2.54257135402651 | 1.24116066403170  |
| H | 3.00936097754590  | -2.72376930346300 | 4.81664733682856  | H | 2.38642586246550  | 0.79243747793640  | -3.71991529164733 |
| H | 4.92797176129107  | 2.31984910398816  | 4.73125156766369  | H | 1.98226217294893  | 5.53515556646637  | -0.72170999399924 |
| H | -2.47868466995866 | 5.32276951281250  | 4.24144411665395  | H | 1.61138307340307  | 1.35571870541497  | 5.95294854650486  |
| H | -5.36230559421598 | -1.91777378760914 | 4.87078212949156  | H | 2.16653052658866  | -5.48380331797784 | 2.01194219781056  |
| H | 4.29892900371725  | 1.23218174949561  | 0.59128793768895  | H | -2.04868390729310 | 4.23711425983474  | -1.62170491272591 |
| H | 1.80075301196215  | -2.24977764285369 | 6.93617107260593  | H | 4.32013342187834  | 0.56598151222856  | -2.19752173165148 |
| H | 1.47376239378552  | -3.97625955876422 | 7.14326500509539  | H | 4.86250827086929  | -0.87632682431730 | -3.06661024221019 |
| H | 3.13693513674315  | -3.37806869322068 | 7.20933660364551  | H | 4.87650189520810  | 0.69806983381818  | -3.87335901169774 |
| H | 2.14490178144048  | -5.62786769586406 | 5.20610677140479  | H | 3.41262391715531  | -1.76960728788086 | -5.03477310152690 |
| H | 3.06552357832156  | -4.98758930368810 | 3.83706999218926  | H | 1.90167322363588  | -0.94626189788345 | -5.44712389313750 |
| H | 3.79019967925466  | -5.02173486681834 | 5.44349560049878  | H | 3.44633447771571  | -0.15594769909885 | -5.76186235243747 |
| H | -3.43740784167137 | -1.29143235236563 | 7.16124619203565  | H | 4.50641587696921  | -3.64673137248723 | 1.31014183379311  |
| H | -4.90075626042421 | -0.37787851104988 | 6.76792685181273  | H | 4.11206137958941  | -4.23363048211769 | 2.93238944769157  |
| H | -5.02437000201185 | -2.05127827562683 | 7.33358126660966  | H | 4.62704615608340  | -5.37246171736053 | 1.67741488599353  |
| H | -3.75844224938567 | -3.70292879004447 | 4.24766586060363  | H | 1.51235124105245  | -5.25227089536419 | -0.37077755459212 |
| H | -2.70562943463376 | -3.25120398165308 | 5.58838203285712  | H | 2.90516071549601  | -4.20961986050529 | -0.66691434884972 |
| H | -4.30701585248312 | -3.93235934025882 | 5.91230036930663  | H | 3.14930067686056  | -5.90969445625210 | -0.23682495440343 |
| H | -2.24398602492145 | 3.51431341559851  | 6.69434959355633  | H | 4.05667323057662  | 0.47160800715960  | 4.34593876204863  |
| H | -1.29564887764798 | 4.98059733231068  | 6.40691653722280  | H | 3.73600308883215  | 2.11927730285619  | 4.90709446091893  |
| H | -3.04626639750873 | 5.08886188727915  | 6.64911662075425  | H | 4.03788221897538  | 0.82558435501499  | 6.07850033126034  |
| H | -4.06225382477989 | 3.62210209369226  | 3.37118994672070  | H | 0.79872135767084  | -0.96737789295070 | 5.64687594218073  |
| H | -3.86673889119943 | 2.66637261072652  | 4.84090439671735  | H | 2.25680627361332  | -1.37568369626462 | -0.23682495440343 |
| H | -4.62326788806295 | 4.26460458459891  | 4.92052901854604  | H | 2.36995953605664  | -0.96171188129237 | 6.45874073669791  |
| H | 2.93515444535573  | 1.96872934549059  | 7.02255208881030  | H | 4.23540919531421  | 3.83320381890138  | 0.44963309361799  |
| H | 4.42191275584381  | 1.03600836177678  | 6.79978565995439  | H | 4.1616555680271   | 4.43239210977404  | -1.21391212835020 |
| H | 4.50567661792787  | 2.77124705940106  | 7.14271556225196  | H | 4.31701357840555  | 5.57124233598606  | 0.13395608616750  |
| H | 3.32476251996219  | 3.98324059879454  | 3.82957908089602  | H | 0.85664682109454  | 5.22079621613723  | 1.46179024410306  |
| H | 2.23626810060336  | 3.69748199838075  | 5.18784453696106  | H | 2.20654730562345  | 4.24141687745392  | 0.23876808841589  |
| H | 3.82043485998934  | 4.43690942917327  | 5.46466909329305  | H | 2.44588235118455  | 5.96149983321998  | 1.69174882250811  |
| H | -2.62525090037075 | -4.91040226795470 | 0.41589545096512  | H | -2.45439320043676 | -4.55278088610545 | -2.07943103272516 |
| H | 3.63611667534902  | -1.97898394987593 | -0.54083961153470 | H | -2.69163624794655 | 1.91981031809257  | -4.09601617609888 |
| H | 2.30680420183512  | 4.65713958453729  | -0.17414898199046 | H | -3.21489995961168 | 4.27391905299891  | 2.40477596729634  |
| H | -4.13062068158454 | 1.76207225069527  | -0.75232212884437 | H | -3.17955192166764 | -2.39163765590667 | 4.53098862558762  |
| N | 1.14197136417858  | -3.42211797990762 | -1.94699644124189 | N | -0.80164652106561 | 0.13313837720220  | -6.92275214022155 |
| C | 1.97534641558938  | -2.64675468806057 | -2.87106878232657 | C | -0.56797223040823 | 1.59379173279129  | -7.02726310166820 |
| C | -0.23142556192535 | -2.91036909855734 | -1.81926375940097 | C | -1.88328262634525 | -0.35653572483322 | -7.80943462031412 |
| H | 2.17775289595224  | -1.67247832492966 | -2.41971874449910 | H | -1.47323329478226 | 2.08108114481571  | -6.65907243323150 |
| H | 1.42998597566691  | -2.46088431126791 | -3.80762911945977 | H | -0.45543168470214 | 1.83581780342985  | -8.08664981046019 |
| C | -0.31691625139282 | -1.60461731783648 | -1.05356485351715 | H | -2.79146494760181 | 0.17520846148676  | -7.51776467950086 |
| H | -0.81064377357857 | -3.67515565817213 | -1.29608913177620 | C | -2.05246899132622 | -1.85307172812053 | -7.67761117505129 |
| H | 1.07991163206812  | -4.36872036901273 | -2.31339491736657 | H | 0.06224574824702  | -0.36232740025880 | -7.14782299459490 |
| C | 3.27306598130524  | -3.37261808192885 | -3.15890034691380 | C | 0.64959053238122  | 2.01560594445052  | -6.23729746694899 |
| H | -0.67511196792622 | -2.78701357335964 | -2.81743605401004 | H | -1.63201742933675 | -0.07033042294474 | -8.83324496579243 |
| H | -1.36203393629528 | -1.29131333814301 | -0.98308651794722 | H | -2.84805356050180 | -2.18948023930351 | -8.34507506371244 |
| H | 0.23759645809648  | -0.80263266548850 | -1.54660558129440 | H | -2.32147544066849 | -2.13323415831508 | -6.65668111605030 |
| H | 0.06788680151673  | -1.71327730572011 | -0.03743393006768 | H | -1.13413839930563 | -2.37847477931612 | -7.95369656096613 |
| H | 3.90008993786795  | -2.78149989337872 | -3.82983493241478 | H | 0.78242283093754  | 3.09532926648445  | -6.32951738608578 |
| H | 3.08327672321471  | -4.33786381794034 | -3.63820019175079 | H | 1.55191480263702  | 1.52889722851055  | -6.61626790278507 |
| H | 3.83634794905673  | -3.55750207454186 | -2.24034517656129 | H | 0.53985824299544  | 1.77345095974829  | -5.17767601140957 |

## R[4]A:pyrrolidine

| CHCl <sub>3</sub> |                   |                   | DMSO              |   |                   |                   |                   |
|-------------------|-------------------|-------------------|-------------------|---|-------------------|-------------------|-------------------|
| C                 | -2.59166158114510 | -2.27789826633359 | 2.44035116025354  | C | -0.25449646795462 | -3.38441131038309 | 0.19115569526081  |
| C                 | -3.03940903270993 | -3.29420250559886 | 1.60164213879495  | C | -1.26992349305569 | -4.20415133003145 | -0.29277650462334 |
| C                 | -2.19450263621509 | -4.30144779220796 | 1.17018309769371  | C | -1.76373634525608 | -4.06304222985262 | -1.57906845630849 |
| C                 | -0.86728020819863 | -4.31301182023415 | 1.58020854268006  | C | -1.24266016139193 | -3.09140054558032 | -2.43191988335294 |
| C                 | -0.39210376282418 | -3.33997780765922 | 2.46593784667285  | C | -0.19030907361976 | -2.27348892677257 | -1.99124236017941 |
| C                 | -1.26628729199584 | -2.33152931096428 | 2.84565710023496  | C | 0.24699883884424  | -2.42910395400017 | -0.68299724579610 |
| O                 | -4.34962488545320 | -3.24220896377434 | 1.18966753027357  | O | -1.77460005823279 | -5.15990301297118 | 0.57444590658310  |
| O                 | -0.06088093842561 | -5.28474238660672 | 1.08122919858966  | O | -1.76885184768410 | -2.98866307016998 | -3.66839717875172 |
| C                 | 1.02065578037709  | -3.39483278505752 | 3.00859694054150  | C | 0.43922244484831  | -1.24734705091901 | -2.91246087828152 |
| C                 | 1.91700246539228  | -2.37850936145881 | 2.33729998247060  | C | -0.26931722734352 | 0.08499496885491  | -2.78755664451598 |
| C                 | 2.43562458153414  | -2.64234922739524 | 1.06817498998839  | C | -1.42478927353122 | 0.33249816062195  | -3.56081205260026 |
| C                 | 3.30800051800251  | -1.74593045730904 | 0.47002445281254  | C | -2.06681635622990 | 1.56692038961636  | -3.41034608580477 |
| C                 | 3.61397567892658  | -0.53509356624021 | 1.07665159400952  | C | -1.60237562447961 | 2.532122212825617 | -2.52520953257722 |
| C                 | 3.06295289907448  | -0.21072876700530 | 2.32154328977533  | C | -0.45753743646045 | 2.30186342319897  | -1.75661284950553 |
| C                 | 2.23464800495358  | -1.15724544647824 | 2.91651677395785  | C | 0.16143936476528  | 1.06381087467423  | -1.90763035629974 |
| O                 | 2.06704930716528  | -3.76902112166523 | 0.39553466789112  | O | -1.90003525496981 | -0.57678406281746 | -4.40468373021393 |
| C                 | 3.32433994705275  | 1.14018105701510  | 2.96498770264386  | C | 0.08568208394805  | 3.33394085810474  | -0.78549536413459 |
| C                 | 2.45248526875992  | 2.17680763271817  | 2.27841941212281  | C | -0.56343899936498 | 3.15388179872303  | 0.57446898558184  |
| C                 | 2.96981986881848  | 3.03073677334264  | 1.30718533833842  | C | -1.66919183940953 | 3.91712584782642  | 0.94495964992172  |
| C                 | 2.16221801231707  | 3.91465591606042  | 0.61391364875288  | C | -2.28880898068842 | 3.74409658380789  | 2.17018038108442  |
| C                 | 0.80591197949223  | 3.98885000385571  | 0.90546258641891  | C | -1.80034872503090 | 2.80731118912218  | 3.07441111965387  |
| C                 | 0.25902965849204  | 3.20012190172273  | 1.92251699488521  | C | -0.67304871361177 | 2.04113208708505  | 2.75684629917187  |
| C                 | 1.09638180160653  | 2.28705623347082  | 2.55126680689195  | C | -0.11130379263307 | 2.22008706591795  | 1.49720307002337  |
| O                 | 4.31577575176929  | 2.94936441805206  | 1.04310015465691  | O | -2.12557205497370 | 4.85209455220591  | 0.04935461523780  |
| O                 | 0.06777432335131  | 4.87133049054452  | 0.18073558423525  | O | -2.45213770733096 | 2.71695505143412  | 4.26363975724717  |
| C                 | -1.18215338750094 | 3.36547372723221  | 2.37055299582563  | C | -0.05366567401738 | 1.08240856166700  | 3.75991560985204  |
| C                 | -2.05382495002030 | 2.26069542526826  | 1.80917496606919  | C | -0.59453004354002 | -0.32180816906023 | 3.56753788769568  |
| C                 | -2.59942821754938 | 2.37938275449646  | 0.53276733487114  | C | -1.71984533195861 | -0.74878242167049 | 4.27087538749967  |
| C                 | -3.39696835836170 | 1.38747020518411  | -0.00891806825119 | C | -2.25138413633306 | -2.01328048689237 | 4.08855342774053  |
| C                 | -3.68268431674580 | 0.24187364268497  | 0.72565791216709  | C | -1.64991482343043 | -2.90222040701493 | 3.20407970554385  |
| C                 | -3.17112295634246 | 0.08945386509359  | 2.01856009748593  | C | -0.49001971724561 | -2.53324401343444 | 2.51474099948483  |
| C                 | -2.35038702040144 | 1.09907734229882  | 2.50729650027797  | C | -0.01984466826476 | -1.23681195301512 | 2.69595201116371  |
| O                 | -2.32991443418083 | 3.52384150002377  | -0.17415805683378 | O | -2.28538129995885 | 0.12825487469067  | 5.16249485874370  |
| O                 | -4.48539515525010 | -0.66798769326151 | 0.12051952874938  | O | -2.22816978993072 | -4.12609316624844 | 3.0870328892384   |
| C                 | -3.50020841934314 | -1.13651410974890 | 2.85089632426672  | C | 0.24101131362058  | -3.51538630110870 | 1.61705924480629  |
| C                 | 1.02027849058854  | -3.31577789935606 | 4.53757542808913  | C | 1.95434755656176  | -1.15209875059029 | -2.71351595961041 |
| C                 | 3.18298476893517  | 1.11180900288208  | 4.49088364369435  | C | 1.62008921676325  | 3.34225186929344  | -0.74647860704972 |
| C                 | -1.26168052234381 | 3.54889250168779  | 3.89400164002541  | C | 1.47891280390699  | 1.17843735511107  | 3.76118498377079  |
| C                 | -3.49318201041156 | -0.84426192213025 | 4.35629924156373  | C | 1.76421192373028  | -3.40539129221633 | 1.77407929483914  |
| C                 | 2.37198670940678  | 3.55161610864948  | 5.21028160520291  | C | 2.67753191637556  | -0.3115321110345  | -3.76563218282234 |
| C                 | 3.86861934606897  | 2.25325851305118  | 5.24313064678081  | C | 2.26342899502245  | 4.64352020517115  | -0.26680928854143 |
| C                 | -2.47309991906245 | 4.33459253858591  | 4.39801695046727  | C | 2.15740304589829  | 0.77423991794720  | 5.07048262723574  |
| C                 | -4.27192530276399 | -1.83084367916347 | 5.22745863982573  | C | 2.55209973872354  | -4.66249181321242 | 1.40388609253489  |
| O                 | 4.46494896719162  | 0.27063362671481  | 0.39031892626091  | O | -2.30934034027927 | 3.70027540391819  | -2.47802565237966 |
| C                 | 2.22780184022961  | -3.37586897904990 | 6.71755764154107  | C | 0.46424342075719  | 0.07972037161624  | -3.27113475041554 |
| C                 | 2.94765359399662  | -4.92350413305379 | 4.88014009451936  | C | 2.77344073650351  | -1.04173716960178 | -5.09940681082922 |
| C                 | -4.38126837947714 | -1.26937247406454 | 6.64177104543407  | C | 4.01384380841248  | -4.47507046087607 | 1.79550019860219  |
| C                 | -3.66859266761442 | -3.23016002444468 | 5.26640221340876  | C | 2.45074028094154  | -5.04707349923639 | -0.06756231654999 |
| C                 | -2.34607387634898 | 4.55012150828124  | 5.90229420547606  | C | 3.64973989722524  | 1.07409178041038  | 4.97823315234551  |
| C                 | -3.81519613633455 | 3.69277484376279  | 4.06907186985498  | C | 1.93931569719848  | -0.68275010495744 | 5.46058811400238  |
| C                 | 3.85409097233593  | 1.94723467385213  | 6.73770360662762  | C | 3.77604817453276  | 4.54790040768655  | -0.43593167817522 |
| C                 | 3.25143628833629  | 3.62342750683288  | 4.98643712454163  | C | 1.92422728702811  | 5.01171250480704  | 1.17273202182539  |
| H                 | -0.89349209392103 | -1.54547325850094 | 3.49639389477843  | H | 1.04254080218839  | -1.78243445693647 | -0.33078177232991 |
| H                 | -4.52350561623564 | -3.94550798131389 | 0.55299019116632  | H | -2.50798176717750 | -5.62453202504740 | 0.13665978730207  |
| H                 | 0.82101725118757  | -4.87410711844178 | 0.92024461004429  | H | -1.74390610446955 | -2.01487170911883 | -3.98786243512450 |
| H                 | 1.41557845146867  | -4.38268746781005 | 2.75366042899634  | H | 0.26460715756146  | -1.59555183792940 | -3.93588198256991 |
| H                 | 1.81459941045864  | -0.92970903647423 | 3.88998059787237  | H | 1.04768242270497  | 0.86929978502350  | -1.31345856033251 |
| H                 | 1.75815174404479  | -3.47587839328318 | -0.56300456640543 | H | -1.91843396599627 | -0.19262771224682 | -5.83153172471124 |
| H                 | 4.37138619459904  | 1.40351904798013  | 2.77098306727173  | H | -0.20525391712893 | 4.32151093184547  | -1.15833513414973 |
| H                 | 0.66945755786204  | 1.64198760216855  | 3.31446181827436  | H | 0.75206011986339  | 1.61731115400406  | 1.23602309132268  |
| H                 | 4.54275835593626  | 3.52674861423966  | 0.30449685179689  | H | -2.91777997932033 | 5.28441192612104  | 0.39077888205917  |
| H                 | -0.83914466951629 | 4.52522303737458  | 0.08829719174955  | H | -2.34009449028521 | 1.82639104288154  | 4.65005216849039  |
| H                 | -1.54568811076595 | 4.30899871050145  | 1.94653291870783  | H | -0.36661366606366 | 1.41656118466168  | 4.75458484388380  |
| H                 | -1.94906407150525 | 0.98339896552476  | 3.50723441339490  | H | 0.86804389140202  | -0.93920051524163 | 2.14957504556421  |
| H                 | -2.73726609638686 | 3.48133491559191  | -1.04686368297518 | H | -3.08251172980303 | -0.25375042833756 | 5.54939410640240  |



|   |                   |                   |                   |   |                   |                   |                   |
|---|-------------------|-------------------|-------------------|---|-------------------|-------------------|-------------------|
| H | -4.50089776107174 | -1.52310176569083 | 0.58829882716405  | H | -2.00256956031058 | -4.54073170592323 | 2.23159156809816  |
| H | -4.53060989465622 | -1.42567684857776 | 2.61174387363967  | H | -0.01627060174941 | -4.52104200958042 | 1.96479686030011  |
| H | 0.31062881645428  | -0.06906953278189 | 4.90523480592566  | H | 2.37203117507393  | -2.16684586178727 | -2.71787166886573 |
| H | 0.62372919369382  | -2.34885012186179 | 4.86922421696258  | H | 2.17987369659397  | -0.74307402998716 | -1.72379863089941 |
| H | 3.62610043632160  | 0.17185725944250  | 4.84108444599684  | H | 1.97320840375123  | 3.15406327395924  | -1.76614866747239 |
| H | 2.12711212940525  | 1.07739768261591  | 4.78768497509780  | H | 2.00315380785190  | 2.51432336012197  | -0.13931641706599 |
| H | -0.36310167075920 | 4.09622658905149  | 4.20113392311318  | H | 1.74136776837327  | 2.22306218762762  | 3.56212459102779  |
| H | -1.21007821669696 | 2.58516456941296  | 4.41410242255703  | H | 1.91224634290120  | 0.59977532765159  | 2.93822130729695  |
| H | -3.93865607216956 | 0.14749421303537  | 4.49864085882272  | H | 1.96886969747168  | -3.18421720644888 | 2.82726074859877  |
| H | -2.46635192346529 | -0.77241746867601 | 4.73656205300040  | H | 2.15839798928988  | -2.55502003994854 | 1.20676372727094  |
| H | 3.07711108692724  | -2.79226854106772 | 4.84761565609076  | H | 2.09925656818642  | 0.60886615411944  | -3.91503141908608 |
| H | 4.91757234305866  | 2.28318233835114  | 4.91367743676398  | H | 1.89822194495313  | 5.45004395512629  | -0.91771819373289 |
| H | -2.44358418546620 | 5.32007698719068  | 3.90990369480199  | H | 1.73312739671671  | 1.40400045554969  | 5.86490322246182  |
| H | -5.28808050373022 | -1.90725848487266 | 4.81340452847080  | H | 2.14449736135786  | -5.49084075184673 | 1.99993395497580  |
| H | 4.49491143010207  | 1.17680837542864  | 0.74620161453049  | H | -2.17607338103071 | 4.15836259165193  | -1.62792099951620 |
| H | 1.84061104346576  | -2.38199629135447 | 6.96537396210979  | H | 4.00333726342405  | 0.66356478910970  | -2.34734141562786 |
| H | 1.53401050370105  | -4.11738658100669 | 7.13072801335127  | H | 4.66679077290097  | -0.81224830817469 | -3.06584933171355 |
| H | 3.18926116187813  | -3.49953317592092 | 7.22541521257619  | H | 4.59734667887929  | 0.67829547068272  | -4.01582494601280 |
| H | 2.24330379881616  | -5.71648054969723 | 5.15790871276588  | H | 3.39930098057641  | -1.93536226190567 | -4.99882488271349 |
| H | 3.17148986462172  | -5.03134203682154 | 3.81507154456389  | H | 1.79305059793640  | -1.36124532417575 | -5.46108055371035 |
| H | 3.87868798842321  | -5.09591865155487 | 5.42885559469725  | H | 3.21913134307360  | -0.40340722248616 | -5.86797503661899 |
| H | -3.38740835479222 | -1.16663287831540 | 7.09288351263910  | H | 4.46158502250092  | -3.65496815524629 | 1.22325981253867  |
| H | -4.85322762519119 | -0.28180153191194 | 6.64562538536436  | H | 4.11533059979464  | -4.23653194250288 | 2.85843566373541  |
| H | -4.97127721325377 | -1.92965829290153 | 7.28463170861391  | H | 4.59528981885161  | -5.37917534964204 | 1.59307089290932  |
| H | -3.67643785247228 | -3.71435686578025 | 4.28795218565631  | H | 1.42550173485071  | -5.27473194339669 | -0.36553302680113 |
| H | -2.62717439520085 | -3.19260533955474 | 5.60641873278455  | H | 2.80736526033048  | -4.23081841156468 | -0.70537400027365 |
| H | -4.22607050006943 | -3.86587188466207 | 5.96175418749583  | H | 3.06700194125066  | -5.92776934555085 | -0.27253381197445 |
| H | -2.37914971718771 | 3.59061257337273  | 6.43145106434748  | H | 4.11521441390689  | 0.46523514744793  | 4.19515123509306  |
| H | -1.40187892463719 | 5.04105311797893  | 6.15858966124193  | H | 3.83158197676307  | 2.12577761882017  | 4.73776808661431  |
| H | -3.16411137678798 | 5.16854363629895  | 6.28410148676499  | H | 4.15631100462254  | 0.84867495274014  | 5.92111322725827  |
| H | -3.97604901931200 | 3.60131343511465  | 2.99237307138305  | H | 0.88433064012133  | -0.91267284268856 | 5.62254633520313  |
| H | -3.88235722989501 | 2.68683559979567  | 4.49803902706359  | H | 2.30740034745211  | -1.35375358012126 | 4.67678773790518  |
| H | -4.63338717075051 | 4.29066562043749  | 4.48339288309578  | H | 2.48086462218566  | -0.91320117352951 | 6.38312841711968  |
| H | 2.82420370358546  | 1.89657547626428  | 7.11000941728266  | H | 4.18251640670710  | 3.75375810752002  | 0.20032494867935  |
| H | 4.33501668781904  | 0.98834647487155  | 6.95544694503768  | H | 4.05019799397463  | 4.32119811623938  | -1.47070171684077 |
| H | 4.37493326287932  | 2.72434306024336  | 7.30539154426578  | H | 4.26432484055749  | 5.48461167951707  | -0.15201220855235 |
| H | 3.33893285697027  | 3.93050586519144  | 3.94244329495631  | H | 0.85623456378850  | 5.18770489083163  | 1.31416071448897  |
| H | 2.18511804052781  | 3.62072300280295  | 5.24074220386885  | H | 2.22021194523403  | 4.20951823973917  | 1.85781195229158  |
| H | 3.74159097313937  | 4.38311972335399  | 5.60379072860691  | H | 2.45830226875517  | 5.92041165304427  | 1.46698180002327  |
| H | -2.54510704023692 | -5.06447400596535 | 0.48078376413271  | H | -2.57129982096891 | -4.69837842628473 | -1.93080057855475 |
| H | 3.74319168870292  | -1.97645650865473 | -0.49650490353527 | H | -2.96568298238560 | 1.77149397467672  | -3.98324229327227 |
| H | 2.57346203902843  | 4.54633574686906  | -0.16864230882778 | H | -3.15894600187431 | 4.33550992925007  | 2.43856859497352  |
| H | -3.81304857778137 | 1.49336236957566  | -1.00704878557626 | H | -3.14010953123511 | -2.32262857468548 | 4.63009593881243  |
| N | 1.10322548546460  | -3.03659359766753 | -1.91449280202491 | N | -1.83677403859680 | 0.07880984649609  | -6.89320996779231 |
| C | 1.36424081255665  | -1.65909584687309 | -2.36486146977493 | C | -0.41303478467386 | -0.03343133010642 | -7.29158854514022 |
| C | -0.35733652119281 | -3.07840125290443 | -1.73509950966319 | C | -2.19593058360914 | 1.50990676785037  | -7.08940191996848 |
| C | 0.46335449521557  | -0.80585160928238 | -1.46947976527445 | C | 0.19367211693937  | 1.20399035730551  | -6.65462265673676 |
| H | 1.07366135983534  | -1.54661356890354 | -3.41860790674649 | H | -0.35613325186306 | -0.00346821255244 | -8.38209414151419 |
| C | -0.66048111493010 | -1.76383395729678 | -1.01824104553299 | C | -0.89939786158530 | 2.27945383101224  | -6.79672464101537 |
| H | -0.64790748793604 | -3.96150279094318 | -1.16303852593317 | H | -2.44062323121307 | -0.54144920290352 | -7.42867490481492 |
| H | 1.40286923794839  | -3.70823381324873 | -2.61530542881587 | H | -2.51965986053574 | 1.63749891703783  | -8.12293909140184 |
| H | -0.86136613979180 | -3.11220127139945 | -2.71093084257603 | H | -0.00748576183465 | -0.97803802550717 | -6.93045334377588 |
| H | 2.42459750928574  | -1.41518693731201 | -2.27498921179228 | H | -3.02231318690686 | 1.76039598511359  | -6.42547384906349 |
| H | 0.08172755447182  | 0.06142406676046  | -2.01292840921025 | H | 1.13162439993608  | 1.48514180680701  | -7.13388406096341 |
| H | 1.02229214274527  | -0.43625471895353 | -0.60630339799901 | H | 0.39846398277887  | 1.00793734539999  | -5.59939649303676 |
| H | -0.63104168651158 | -1.90560882499171 | 0.06444438371642  | H | -0.98918565975521 | 2.86803780190818  | -5.88300765865296 |
| H | -1.65684823523620 | -1.39396086941389 | -1.27036657623898 | H | -0.68048765135776 | 2.96332874647821  | -7.61793360350534 |

## R[4]A:piperidine

| CHCl3 |                   |                   | DMSO              |   |                   |                   |                    |
|-------|-------------------|-------------------|-------------------|---|-------------------|-------------------|--------------------|
| C     | -2.62448618974627 | -2.30765905695827 | 2.49832872274665  | C | -0.15954688763853 | -3.28040519670638 | 0.07180722396059   |
| C     | -3.07806509102139 | -3.32614293680433 | 1.66572651324060  | C | -1.15619032103645 | -4.09697858744736 | -0.45498031828789  |
| C     | -2.23061498144560 | -4.32152395362887 | 1.21267638149195  | C | -1.64761003874121 | -3.90739301016159 | -1.73600164657399  |
| C     | -0.89522501153268 | -4.32100816212824 | 1.59516073306069  | C | -1.14545061697816 | -2.88481805829406 | -2.53886014006924  |
| C     | -0.41369230011915 | -3.34896571247801 | 2.47919687904492  | C | -0.11327668314778 | -2.06605142080435 | -2.05485952394851  |
| C     | -1.29129378685922 | -2.35105969102327 | 2.87857645241908  | C | 0.32480511405628  | -2.27482264797509 | -0.75427857858965  |
| O     | -4.39716601219364 | -3.28650815545359 | 1.27942870991391  | O | -1.64601450743978 | -5.10101867941916 | 0.34702386338074   |
| O     | -0.08900434708702 | -5.28183860210056 | 1.07498640858873  | O | -1.66960927719448 | -2.73546274246815 | -3.77227952960057  |
| C     | 1.00426504740297  | -3.40037666708446 | 3.00672658681069  | C | 0.49413297571714  | -0.98381361522298 | -2.92352611159838  |
| C     | 1.89944664124697  | -2.38035351277249 | 2.33872275159689  | C | -0.24015648734710 | 0.32700924522786  | -2.73585168364368  |
| C     | 2.41227345319127  | -2.63839427908446 | 1.06561996042563  | C | -1.39447341091108 | 0.58807452871326  | -3.50568290191409  |
| C     | 3.30948629669376  | -1.75763667236109 | 0.48248834225507  | C | -2.06206623843930 | 1.80245878174278  | -3.30521728855878  |
| C     | 3.63123095206686  | -0.55453772415514 | 1.09651411116841  | C | -1.62301392927637 | 2.73449832224746  | -2.37267655933042  |
| C     | 3.06832110241781  | -0.22336951345283 | 2.33415326210548  | C | -0.48145815975475 | 2.48927335598029  | -1.60326290060761  |
| C     | 2.22965832210983  | -1.16501626537629 | 2.92374812426660  | C | 0.16377520727865  | 1.27193116649472  | -1.80745659328491  |
| O     | 2.00637437938550  | -3.73686908465073 | 0.36712428904245  | O | -1.84140710851051 | -0.28803293279444 | -4.39591304242914  |
| C     | 3.31246175711577  | 1.13658001038446  | 2.96443444020294  | C | 0.02900583638096  | 3.48214448942835  | -0.57455686462264  |
| C     | 2.42576023075536  | 2.14853411134447  | 2.25891382254388  | C | -0.63533660764400 | 3.21936332190134  | 0.76433611723174   |
| C     | 2.92920287769809  | 2.98386208800173  | 1.26413212543460  | C | -1.77039057409547 | 3.92894380831034  | 1.15193610479535   |
| C     | 2.10702226519594  | 3.83321836691593  | 0.54515050437551  | C | -2.40766091587554 | 3.67385602865677  | 2.35356611570425   |
| C     | 0.75020324037653  | 3.89872722647106  | 0.83712554791901  | C | -1.90719902868872 | 2.70629211459356  | 3.21804258404310   |
| C     | 0.21768311880254  | 3.13782508926907  | 1.88326491700947  | C | -0.74793305329422 | 1.99552861842295  | 2.88625390839765   |
| C     | 1.06885231702043  | 2.25179130583132  | 2.53268868682292  | C | -0.16988015929021 | 2.25566233520232  | 1.64849929963298   |
| O     | 4.27756074583595  | 2.92208444787864  | 1.00507245739419  | O | -2.24082301655692 | 4.89458097122600  | 0.29732483192083   |
| O     | -0.00007643224212 | 4.74786339165621  | 0.08665026628599  | O | -2.58191022555525 | 2.53033932161737  | 4.38419848912377   |
| C     | -1.21809819364644 | 3.31581159478642  | 2.34261537898671  | O | -0.11183354560890 | 1.01087822778176  | 3.85297862632971   |
| C     | -2.10817169829394 | 2.21103029992659  | 1.81239625627171  | C | -0.60832933210884 | -0.39829749087930 | 3.59169664587194   |
| C     | -2.69950769011336 | 2.32800045984658  | 0.55649813623679  | C | -1.71961944288153 | -0.89376191471935 | 4.27141745449211   |
| C     | -3.52614987136611 | 1.34109825982904  | 0.05043731887951  | C | -2.21250370426781 | -2.16324897677500 | 4.02731374604660   |
| C     | -3.79105150904410 | 0.19942685523753  | 0.79824756197244  | C | -1.58391251128887 | -2.98844535189032 | 3.10107094243425   |
| C     | -3.23214942936891 | 0.04823770550300  | 2.07186640577394  | C | -0.43553915474657 | -2.55112598072136 | 2.43295697666111   |
| C     | -2.38690242955588 | 1.05307693019332  | 2.52494707610303  | C | -0.00533887732302 | -1.25106759350842 | 2.62761151170412   |
| O     | -2.44368229058056 | 3.46592446724610  | -0.16681071206098 | O | -2.31223152766583 | -0.07880213511883 | 5.20320321566602   |
| O     | -4.61903404206736 | -0.71005135913134 | 0.22665422307942  | O | -2.12519650325894 | -4.22207272273854 | 2.92347337363517   |
| C     | -3.53460066538946 | -1.17235633090635 | 2.92092374937843  | C | 0.32989829889846  | -3.46599644194293 | 1.49362368651750   |
| C     | 1.01512238234876  | -3.33118934189761 | 4.53621768156970  | C | 2.00716380216838  | -0.86361773771683 | -2.72829282543164  |
| C     | 3.16518499234446  | 1.12375293196952  | 4.48942053555725  | C | 1.56241521646481  | 3.51799427220660  | -0.51397624400800  |
| C     | -1.28164959057442 | 3.52410708329507  | 3.86385581517502  | C | 1.41727505202618  | 1.15099971538646  | 3.87456461147517   |
| C     | -3.49680844495070 | -0.86537358122408 | 4.42283805056731  | C | 1.84778764940969  | -3.31553230244919 | 1.66971753921091   |
| C     | 2.37077840380695  | -3.57382120169432 | 5.19850314624758  | C | 2.69693507638900  | 0.00897528648066  | -3.77753457366873  |
| C     | 3.83819310016489  | 2.27985564613561  | 5.23023278553492  | C | 2.17441508358549  | 4.80341809540443  | 0.04368035075937   |
| C     | -2.48588213601337 | 4.32137203865313  | 4.36676315341828  | C | 2.09726512761675  | 0.70728463626806  | 5.17014109640616   |
| C     | -4.25868457717386 | -1.84415641974065 | 5.31679245194429  | C | 2.67690236088260  | -4.53361826019468 | 1.26255681493875   |
| O     | 4.49602156876915  | 0.24201545927280  | 0.41697995361564  | O | -2.35276481664452 | 3.88536788243503  | -2.27875036847649  |
| C     | 2.23667284632001  | -3.40174944207672 | 6.70689971130193  | C | 4.06562941601638  | 0.45847715898466  | -3.28316604542545  |
| C     | 2.93793346459822  | -4.94735453327217 | 4.86159922968722  | C | 2.822133669699518 | -0.71791746438089 | -5.11068621013142  |
| C     | -4.34024529804897 | -1.27170202454088 | 6.72821949455407  | C | 4.13013667581132  | -4.31179748581146 | 1.66762384924317   |
| C     | -3.65380398655212 | -3.24277528619220 | 5.35427634146821  | C | 2.59301956332205  | -4.87105891393959 | -0.22141623912261  |
| C     | -2.33407198432695 | 4.57529002286044  | 5.86264825607206  | C | 3.57907008705558  | 1.06254057459223  | 5.10754523988971   |
| C     | -3.83183227197501 | 3.66770747780827  | 4.07921025661904  | C | 1.92668283478165  | -0.77375662774126 | 5.48627080586134   |
| C     | 3.81287879869793  | 1.99616434652564  | 6.72879375497774  | C | 3.68908641522293  | 4.75423853735541  | -0.12776852227849  |
| C     | 3.21429459123243  | 3.64190223169717  | 4.94844428657512  | C | 1.82745987393681  | 5.07609732855014  | 1.50273647881727   |
| H     | -0.91443419513724 | -1.56510855700966 | 3.52513107877469  | H | 1.10572887903931  | -1.62887213170097 | -0.36947188923331  |
| H     | -4.57680612042322 | -3.99374342558159 | 0.64920086240391  | H | -2.37176063831932 | -5.55526669188776 | -0.097575174171328 |
| H     | 0.78595138213976  | -4.86105181268255 | 0.90274085755840  | H | -1.66180240741095 | -1.75020433040285 | -4.04711420950175  |
| H     | 1.39881768714580  | -4.38433686957068 | 2.74162810131694  | H | 0.32419168172215  | -1.28632523964335 | -3.96209516911698  |
| H     | 1.80903087805089  | -0.93591441178481 | 3.89551551108933  | H | 1.04834933152883  | 1.06665974937064  | -1.21429328217634  |
| H     | 1.63767658835511  | -3.39960383945453 | -0.55563402877481 | H | -0.27642115203768 | 4.48140186337864  | -0.90266375737229  |
| H     | 4.35442739448976  | 1.41293187017246  | 2.76950057739596  | H | 0.71707056182422  | 1.69444147520217  | 1.37432931095060   |
| H     | 0.65343675013815  | 1.62661210932110  | 3.31672924234057  | H | -3.05479760935032 | 5.27900121602345  | 0.64451282556850   |
| H     | 4.49428474723795  | 3.48735779597976  | 0.25450411429334  | H | -2.43096958503121 | 1.63272947919145  | 4.73942061806590   |
| H     | -0.91138560892232 | 4.40549844915885  | 0.02689192710790  | H | -0.44473461117208 | 1.29089227657073  | 4.85789327142047   |
| H     | -1.57898647248130 | 4.25367284286372  | 1.90756228424207  | H | 0.87278476529864  | -0.90005921159175 | 2.14733600510470   |
| H     | -1.95018721325834 | 0.93931851470002  | 3.50901473878339  | H | -3.09946524892612 | -0.50346918942850 | 5.56483274278103   |

|   |                   |                   |                   |   |                   |                   |                   |
|---|-------------------|-------------------|-------------------|---|-------------------|-------------------|-------------------|
| H | -2.87966082424141 | 3.42022794610530  | -1.02509123127525 | H | -1.89477812355514 | -4.58309025452880 | 2.04493822001078  |
| H | -4.60116664373345 | -1.56932588425598 | 0.68640156615996  | H | 0.10174088179143  | -4.49483475130885 | 1.79038480351337  |
| H | -4.56591954728889 | -1.47163357924871 | 2.70647385066081  | H | 2.44628646754906  | -1.86884748470409 | -2.75341225222493 |
| H | 0.30722961772533  | -4.08452739206524 | 4.90422168785329  | H | 2.23179664636149  | -0.46678033206760 | -1.73329978248869 |
| H | 0.62342007302185  | -2.36585464196635 | 4.87521326319713  | H | 1.93133976450340  | 3.39090544158697  | -1.53755948148005 |
| H | 3.61482956515832  | 0.19260778477590  | 4.85166586594501  | H | 1.95377365890730  | 2.66574731579182  | 0.05290368169130  |
| H | 2.10944745693233  | 1.08394935971872  | 4.78236949728076  | H | 1.65083192979565  | 2.21066394154187  | 3.72502287406054  |
| H | -0.37941654585176 | 4.07325597171385  | 4.15285759387271  | H | 1.87407271316029  | 0.62288377720294  | 3.03050896843218  |
| H | -1.22909180113155 | 2.56910529124069  | 4.39783763657565  | H | 2.03688815898552  | -3.12618299506332 | 2.73186100694594  |
| H | -3.93867188105226 | 0.12709661432216  | 4.56444007175990  | H | 2.22017024304395  | -2.43379621824087 | 1.13677144279008  |
| H | -2.46340405369146 | -0.79145772648683 | 4.78130129339353  | H | 2.07897128872688  | 0.90357145036630  | -3.92768217655203 |
| H | 3.07558677420749  | -2.81725911482949 | 4.83312610772079  | H | 1.79033558876251  | 5.63871943570364  | -0.55822892673131 |
| H | 4.88837804443121  | 2.31127765336995  | 4.90889046899565  | H | 1.64496339726348  | 1.28308823554914  | 5.98963894109186  |
| H | -2.46671417975457 | 5.29285548817146  | 3.85342458900068  | H | 2.29350435626642  | -5.39370469839280 | 1.82892840486383  |
| H | -5.28146765528967 | -1.92366347042219 | 4.92324948185555  | H | -2.24409114219750 | 4.29983577468295  | -1.40276060876957 |
| H | 4.50733840968690  | 1.15623066049604  | 0.75290638268153  | H | 3.97922330060021  | 1.03789101825498  | -2.35858623881649 |
| H | 1.85531596142248  | -2.40744956136691 | 6.95933576211129  | H | 4.70612339507690  | -0.40689997443549 | -3.07896935708969 |
| H | 1.54246062081466  | -4.14134330864895 | 7.12114831885213  | H | 4.57263563838636  | 1.08039662359631  | -4.02695170255723 |
| H | 3.20024737057910  | -3.53109426076929 | 7.20804133960607  | H | 3.47314467259419  | -1.59286179864719 | -5.00557657447266 |
| H | 2.2334319498052   | -5.73703848292390 | 5.14559559280949  | H | 1.85325311719298  | -1.06436087610521 | -5.47996588077399 |
| H | 3.15045887350508  | -5.05436815144230 | 3.79473683808659  | H | 3.25440494250135  | -0.06713692716832 | -5.87637138493794 |
| H | 3.87312724173422  | -5.12336353042832 | 5.40087919439703  | H | 4.55432586989600  | -3.46216829265692 | 1.12112112555264  |
| H | -3.33783079698588 | -1.16438281726430 | 7.15726437091517  | H | 4.21887436112786  | -4.09992979278748 | 2.73735983481711  |
| H | -4.81307741647058 | -0.28522495174530 | 6.73318063784045  | H | 4.74089417561429  | -5.19104987973112 | 1.44326612902644  |
| H | -4.91597858551640 | -1.92736917456000 | 7.38756120395624  | H | 1.57629515981270  | -5.11989489176692 | -0.53177529507962 |
| H | -3.67358558604192 | -3.73016321849368 | 4.37817458396559  | H | 2.92585238128456  | -4.02216142177412 | -0.82867780026657 |
| H | -2.60870610938293 | -3.20208111857374 | 5.68049269970204  | H | 3.23712060488086  | -5.72455491491732 | -0.45378128399629 |
| H | -4.20153490018060 | -3.87530722508457 | 6.05921460303544  | H | 4.07224655132666  | 0.50930173604922  | 4.30053710567577  |
| H | -2.35423538192033 | 3.62950695818487  | 6.41529056194532  | H | 3.72614569252456  | 2.13042756640152  | 4.92058448243614  |
| H | -1.38836739940271 | 5.07610228053248  | 6.08990435241456  | H | 4.08522704854456  | 0.80866225116459  | 6.04338860632069  |
| H | -3.14821148705739 | 5.19940857702402  | 6.24185416532605  | H | 0.87884491287280  | -1.04800882667537 | 5.62345142156750  |
| H | -4.01024757449403 | 3.54341077986823  | 3.00930090759595  | H | 2.32669062769060  | -1.39150057408714 | 4.67477230515956  |
| H | -3.88798437287728 | 2.67584865883708  | 4.54000502151833  | H | 2.46646708081181  | -1.03034872595558 | 6.40290942668822  |
| H | -4.64358838470158 | 4.27596024266328  | 4.48943621422334  | H | 4.11440120064886  | 3.93516148411762  | 0.46292713781120  |
| H | 2.78050018763040  | 1.94753927466671  | 7.09252316650266  | H | 3.96905091154580  | 4.59391390915280  | -1.17330747176261 |
| H | 4.29518331044955  | 1.04284374153654  | 6.96422367188524  | H | 4.15420409305367  | 5.68478452266455  | 1.2014412302222   |
| H | 4.32617377644410  | 2.78338447891921  | 7.28823772856461  | H | 0.75566959463790  | 5.21642794486326  | 6.65504461363257  |
| H | 3.30291858500836  | 3.93101990171622  | 3.89993746364334  | H | 2.14524877132058  | 4.24146036259054  | 2.13738066442525  |
| H | 2.14787093558022  | 3.63687717557916  | 5.19976596102146  | H | 2.33963825874307  | 5.97815730882099  | 1.85123239671605  |
| H | 3.69835485672256  | 4.41402055769592  | 5.55395618737169  | H | -2.43967209011740 | -4.54317006341218 | -2.12065351792186 |
| H | -2.58565491720634 | -5.08487500242501 | 0.52718989226189  | H | -2.96144967788947 | 2.01558900315154  | -3.87509430270586 |
| H | 3.73311848377980  | -1.98297160745220 | -0.48990234879836 | H | -3.30150175015186 | 4.22329469672091  | 2.63309628167096  |
| H | 2.50758355859312  | 4.44732825126363  | -0.25560838808846 | H | -3.09147820953314 | -2.52514844730638 | 4.55185428246858  |
| H | -3.97457702618240 | 1.44393891950113  | -0.93295037183054 | H | -2.09203390231151 | 0.31414253426774  | -5.71852358912867 |
| N | 0.96150390613514  | -2.98086541300381 | -1.90660079529493 | N | -2.22456912978159 | 0.75406303110901  | -6.71964764382469 |
| C | 1.43675653521517  | -1.75612528480644 | -2.56940795106408 | C | -1.97446680520592 | -0.28785488804678 | -7.74755853706529 |
| C | -0.50041458112696 | -2.96725380832634 | -1.74507976622053 | C | -1.33274033429766 | 1.93271881473460  | -6.86944954022849 |
| C | 1.04006985823445  | -0.51707493735619 | -1.78517642856619 | C | -0.52951192840319 | -0.74248070728778 | -7.68797495058134 |
| H | 1.01386325586987  | -1.69571980854400 | -3.58371914317114 | H | -2.21041253181444 | 0.14554978759071  | -8.72382924569528 |
| C | -0.93307693436012 | -1.77279922534855 | -0.91482167184920 | C | 0.11767700290978  | 1.50090306218124  | -6.79400931072548 |
| H | -0.79726175629993 | -3.90145891653715 | -1.26272178062625 | H | -3.19466696255182 | 1.05842087358501  | -6.77998812150658 |
| H | 1.20740888377790  | -3.77076718333350 | -2.49616293526766 | H | -1.55376778312436 | 2.39468449226689  | -7.83616374223231 |
| H | -0.98784220068000 | -2.92608571728943 | -2.73110670026922 | H | -2.66788261104647 | -1.10787358188463 | -7.55321188238590 |
| H | 2.52371462920309  | -1.82118060923238 | -2.66776922209191 | H | -1.58962211108517 | 2.63670732204240  | -6.07689159885190 |
| C | -0.46334671080158 | -0.47157236284113 | -1.54988660519038 | H | -0.34774423264335 | -1.24614816085489 | -6.73150071596450 |
| H | 1.37904343998973  | 0.36980787169939  | -2.32943873926986 | H | 0.74726499314531  | 2.38320459634366  | -6.93633407770536 |
| H | 1.55824314303062  | -0.52161150071528 | -0.82130608632484 | C | 0.42077666837683  | 0.43790712216268  | -7.84193164797280 |
| H | -0.51969225634259 | -1.86672828708604 | 0.09524078851258  | H | -0.36857131850796 | -1.48156540792716 | -8.47718223674882 |
| H | -2.02139091089469 | -1.78536988040324 | -0.81081663371820 | H | 0.33147159694285  | 1.11237128992398  | -5.79171096841654 |
| H | -0.72333444849610 | 0.37799404568246  | -0.91112042333281 | H | 1.45710810912660  | 0.10332790172885  | -7.75315960332530 |
| H | -0.98309613205096 | -0.32306433446989 | -2.50544992497278 | H | 0.30591214793888  | 0.87032716135194  | -8.84339437372665 |

## R[4]A:morpholine

| CHCl3 |                   |                   | DMSO              |   |                   |                   |                   |
|-------|-------------------|-------------------|-------------------|---|-------------------|-------------------|-------------------|
| C     | -2.08650670860101 | -2.67036083025067 | -0.46050715023743 | C | -0.14568064886627 | -3.28520851099019 | 0.04333245631971  |
| C     | -2.42733258258929 | -3.69477204376864 | -1.33864617023124 | C | -1.11966698230231 | -4.12264399376326 | -0.49328171421141 |
| C     | -1.49299496103417 | -4.62080241337261 | -1.76668259248368 | C | -1.60097327188771 | -3.94395972375400 | -1.77965855254750 |
| C     | -0.17780444973488 | -4.52882432275869 | -1.32962823254564 | C | -1.11045125940287 | -2.91195752843518 | -2.57674398433729 |
| C     | 0.19990351365795  | -3.53172892298816 | -0.42393483451034 | C | -0.09966443693056 | -2.07273519221769 | -2.08415339226869 |
| C     | -0.76735262611027 | -2.61507787358333 | -0.03517018869261 | C | 0.32782608760768  | -2.27093184704101 | -0.77817160302942 |
| O     | -3.72516676061581 | -3.73495410906723 | -1.78723455256487 | O | -1.59906761140926 | -5.13375594115602 | 0.30573292076656  |
| O     | 0.71695848458419  | -5.42424011658044 | -1.82681267430546 | O | -1.62735442380956 | -2.76929016643846 | -3.81559024788223 |
| C     | 1.60770979966890  | -3.46329884046433 | 0.13016325482392  | C | 0.49603321092766  | -0.97884068541399 | -2.94702399616876 |
| C     | 2.39798942711226  | -2.34044218369217 | -0.50564045604826 | C | -0.24433549711130 | 0.32560500396386  | -2.73937328013936 |
| C     | 2.90640501104311  | -2.49898158793771 | -1.79640933367567 | C | -1.41779169245406 | 0.58106321628712  | -3.47892638872902 |
| C     | 3.67224626278127  | -1.49885889658854 | -2.37791110557911 | C | -2.08706251389603 | 1.79113288774395  | -3.26641199783438 |
| C     | 3.88290232396074  | -0.29228837822918 | -1.72433738396580 | C | -1.63036179511536 | 2.72805781642029  | -2.34736756388739 |
| C     | 3.34020090947451  | -0.07573783948484 | -0.45262275424501 | C | -0.47156362416268 | 2.48748660993846  | -1.60227904225759 |
| C     | 2.62016930463762  | -1.12008649717651 | 0.11936704779316  | C | 0.17505248842773  | 1.27365541644745  | -1.82043903797205 |
| O     | 2.63021531870734  | -3.63150636042584 | -2.50602514016135 | O | -1.88248995210955 | -0.29808726890445 | -4.36151005614817 |
| C     | 3.49439661305363  | 1.26751074212169  | 0.23739698952585  | C | 0.05345483316799  | 3.48251898379956  | -0.58280567938318 |
| C     | 2.52073331542030  | 2.24926258473829  | -0.39027650892445 | C | -0.61173787122237 | 3.23496535503841  | 0.75878739881622  |
| C     | 2.94901662139397  | 3.20618835905803  | -1.30742342125497 | C | -1.73013431009833 | 3.96808368308464  | 1.15101086348475  |
| C     | 2.05733739088158  | 4.06132646288677  | -1.93021093252061 | C | -2.37159856734184 | 3.72228338365339  | 2.35227176111506  |
| C     | 0.70326341558466  | 3.99343835754955  | -1.62724607946409 | C | -1.89033373804851 | 2.74161403484804  | 3.21256931142880  |
| C     | 0.23691241773814  | 3.08465477262247  | -0.67135820059325 | C | -0.74516652201120 | 2.00973107653397  | 2.87804403976440  |
| C     | 1.16203279807783  | 2.21367329814625  | -0.10820617706041 | C | -0.16385051864774 | 2.26033493428657  | 1.63994825565060  |
| O     | 4.29334395751085  | 3.25689922036489  | -1.58785921954848 | O | -2.18032559969348 | 4.94639065934378  | 0.29975711094113  |
| O     | -0.11710458806616 | 4.85991040122769  | -2.28001569358551 | O | -2.56792282651505 | 2.57257775316168  | 4.37836543384165  |
| C     | -1.21215675348161 | 3.07968492177351  | -0.21871232879919 | O | -0.12593277484684 | 1.01225877560250  | 3.84216265251418  |
| C     | -1.96982924400840 | 1.93021086852398  | -0.85093029134266 | C | -0.62676854152952 | -0.39138988595873 | 3.56130737169417  |
| C     | -2.51067887032440 | 2.06858978664701  | -2.12778510375324 | C | -1.75766199152047 | -0.88047740817518 | 4.21277192467464  |
| C     | -3.19961143352204 | 1.03567520053883  | -2.73856859641217 | C | -2.25345458362961 | -2.14571780507862 | 3.95323255951730  |
| C     | -3.38206264261677 | -0.17242089522640 | -2.07432037899985 | C | -1.60978737142190 | -2.97266133536756 | 3.03883195573470  |
| C     | -2.87739358778116 | -0.34610753252525 | -0.78111753287403 | C | -0.44403351959830 | -2.54094150890125 | 2.39751342305924  |
| C     | -2.16262047770339 | 0.70788858669411  | -0.22402920123308 | C | -0.00979913407158 | -1.24524372317070 | 2.65765085615485  |
| O     | -2.34608321464878 | 3.27269455745470  | -2.76429132075920 | O | -2.36644332855850 | -0.06446576060232 | 5.13300004109526  |
| O     | -4.08145219663572 | -1.12142353028526 | -2.74372965769192 | O | -2.15633642144049 | -4.20131874651190 | 2.84711485452815  |
| C     | -3.10557034295604 | -1.63887157275586 | -0.02113873205173 | C | 0.33343045886946  | -3.45829862811660 | 1.47045584302844  |
| C     | 1.58652879104794  | -3.42925382661015 | 1.66030309127762  | C | 2.00968251263122  | -0.85422976410658 | -2.75662024771886 |
| C     | 3.38788950475065  | 1.17443206043841  | 1.76324046925839  | C | 1.58697383135731  | 3.50053840300936  | -0.52412025336664 |
| C     | -1.30542792611647 | 3.1644865877815   | 1.31211341653638  | C | 1.40335932565797  | 1.14647181473993  | 3.88359958605203  |
| C     | -3.15610962927965 | -1.42707696900435 | 1.49672411970796  | C | 1.84928495595438  | -3.29945873586001 | 1.65578568248448  |
| C     | 2.94653529861292  | -3.57779033954322 | 2.34187922860978  | C | 2.69420665714282  | 0.04716475327044  | -3.78533011310525 |
| C     | 3.98310681038577  | 2.34891431044343  | 2.54111877260482  | C | 2.21533309648082  | 4.78193462633844  | 0.02424434085172  |
| C     | -2.58860078815973 | 3.79233102012907  | 1.85802369339332  | C | 2.06488103112390  | 0.68875555661656  | 5.18390862330661  |
| C     | -3.87218651896520 | -2.51713007223103 | 2.29498123751923  | C | 2.68854221891093  | -4.51285114421704 | 1.25566320053135  |
| O     | 4.63684504077885  | 0.61899286471226  | -2.39153146033924 | O | -2.36151283405359 | 3.87580019608418  | -2.24338893626908 |
| C     | 2.78371937405014  | -3.39914499410297 | 3.84656457860683  | C | 4.05618095251662  | 0.49915709288953  | -3.27466820160885 |
| C     | 3.60151599148968  | -4.91766459284712 | 2.02813316411962  | C | 2.83277474440808  | -0.64658271225720 | -5.13505842949537 |
| C     | -4.05099442502894 | -2.04406325654598 | 3.73409306958095  | C | 4.13499796217283  | -4.28668115505549 | 1.68238957572754  |
| C     | -3.16519340645347 | -3.86738255170038 | 2.27291607904575  | C | 2.62779353593082  | -4.84396383055646 | -0.23093995679061 |
| C     | -2.47335882458547 | 3.94631954408522  | 3.37040680191949  | C | 3.54858690884883  | 1.03938392555010  | 5.14469238001969  |
| C     | -3.85926219362016 | 3.03073494348141  | 1.50206947365590  | C | 1.88512241063521  | -0.79436536294180 | 5.48493883156759  |
| C     | 4.04468853932369  | 1.98905333326801  | 4.02202922407407  | C | 3.72967120332034  | 4.70848142241055  | -0.14108105907398 |
| C     | 3.22680575669032  | 3.65967139485515  | 2.35626764763927  | C | 1.86683816206789  | 5.07245637585981  | 1.47940146383194  |
| H     | -0.47808766370895 | -1.81788292302740 | 0.64227439567192  | H | 1.08919933698273  | -1.60751413172044 | -0.38369017451952 |
| H     | -3.82020160973994 | -4.42214599052484 | -2.45701544698005 | H | -2.31257914151354 | -5.60155369114278 | -0.14471711084338 |
| H     | 1.54776433400717  | -4.92673515849401 | -1.99854238642610 | H | -1.65235502579148 | -1.78339573607875 | -4.06775081523554 |
| H     | 2.10198112771582  | -4.39689735705441 | -0.15041760541473 | H | 0.32288373310519  | -1.27142852398721 | -3.98805759809391 |
| H     | 2.21047537070111  | -0.96852639779818 | 1.11086609026187  | H | 1.07446689830316  | 1.07364802643034  | -1.24851621259980 |
| H     | 2.34941636927479  | -3.33506703034064 | -3.45287673771396 | H | -0.24152945948507 | 4.48280498470147  | -0.91737202058901 |
| H     | 4.50812147737436  | 1.62923031874378  | 0.03416819859622  | H | 0.71055530082067  | 1.68108215819052  | 1.36234534107542  |
| H     | 0.80661718833456  | 1.48033304552377  | 0.60945859968128  | H | -2.98592268208552 | 5.34699643336052  | 0.6483989011403   |
| H     | 4.46055501255223  | 3.89801032305693  | -2.28856433933664 | H | -2.44621085258832 | 1.66396704946761  | 4.71634992422192  |
| H     | -0.98486190784462 | 4.43507492886070  | -2.40787641066364 | H | -0.46953512831183 | 1.28337137515605  | 4.84581629726316  |
| H     | -1.66750337837952 | 4.00446855204779  | -0.58736939238827 | H | 0.88249618299022  | -0.89878806403864 | 2.14885668866628  |
| H     | -1.76660457704293 | 0.57531690849789  | 0.77479314828274  | H | -3.16490418550881 | -0.48453649472928 | 5.47473186709179  |

|   |                    |                   |                   |   |                   |                   |                   |
|---|--------------------|-------------------|-------------------|---|-------------------|-------------------|-------------------|
| H | -2.73997005296455  | 3.24140368175260  | -3.64319130624016 | H | -1.89475122028429 | -4.57585070528993 | 1.98312430184688  |
| H | -4.01271115045991  | -1.99958611216780 | -2.32683992127755 | H | 0.10806039590846  | -4.48610734267627 | 1.77299980792244  |
| H | -4.09753773416864  | -2.00893164499107 | -0.30080549292851 | H | 2.45297342477484  | -1.85666869354265 | -2.80574213511362 |
| H | 0.93685462922681   | -4.24602848246041 | 1.99888622658899  | H | 2.23498743850107  | -0.48054282904392 | -1.75290311601818 |
| H | 1.10962758684896   | -2.50753973156507 | 2.01076184313243  | H | 1.95412934255971  | 3.36193457823291  | -1.54687229613362 |
| H | 3.92077916945750   | 0.26815678969394  | 2.07226166998699  | H | 1.96827804219549  | 2.64765525415637  | 0.04872395537519  |
| H | 2.34581746892133   | 1.03578849414719  | 2.07515014918924  | H | 1.64190863694048  | 2.20678314189994  | 3.74696297395063  |
| H | -0.46751126004105  | 3.78323400959085  | 1.65031155734148  | H | 1.86945528011505  | 0.62551748388640  | 3.04016491501096  |
| H | -1.15033628278505  | 2.18342262908925  | 1.77484937024889  | H | 2.03011257439341  | -3.10807066025561 | 2.71899234804214  |
| H | -3.68461966902768  | -0.48468947082762 | 1.67727299250876  | H | 2.22027213682202  | -2.41629726708606 | 1.12404994420347  |
| H | -2.14737425897531  | -1.29409584450429 | 1.90523280071525  | H | 2.06870751004884  | 0.93912077674193  | -3.91805926667195 |
| H | 3.60727466535610   | -2.78238551710698 | 1.97641468862074  | H | 1.84573538233649  | 5.61732116349273  | -0.58649370547691 |
| H | 5.01209042864967   | 2.49420038215120  | 2.18437623079728  | H | 1.60349228040922  | 1.25890107341718  | 6.00231203927463  |
| H | -2.66591328063173  | 4.79768627086172  | 1.42083939740421  | H | 2.30100066423106  | -5.37686308527924 | 1.81315702866091  |
| H | -4.87043923190847  | -2.64690603758354 | 1.85465513765777  | H | -2.22202341207636 | 4.30932271659873  | -1.38095830636782 |
| H | 4.60606470174040   | 1.50259166348596  | -1.98424535413783 | H | 3.95886111906037  | 1.05907107202121  | -2.33917780700531 |
| H | 2.34879073428360   | -2.42346087027643 | 4.08450976893760  | H | 4.70349567307161  | -0.36427850351938 | -3.08428155767842 |
| H | 2.12332428768395   | -4.17005010185846 | 4.25904781959990  | H | 4.56125576718003  | 1.14069438651310  | -4.00289839656588 |
| H | 3.74609059893574   | -3.47447520654062 | 4.36087962139384  | H | 3.48942145278204  | -1.51921351830297 | -5.04776437424984 |
| H | 2.94596309328163   | -5.74538229953844 | 2.32091719547765  | H | 1.86919458782507  | -0.99063139764136 | -5.51987686163610 |
| H | 3.82743126249486   | -5.02785202945054 | 0.96442305767382  | H | 3.26519905807733  | 0.02652687392054  | -5.88117871157276 |
| H | 4.54221191929565   | -5.02609457263174 | 2.57547958058346  | H | 4.56340769729945  | -3.43271177500159 | 1.14604188751808  |
| H | -3.07693715812813  | -1.88521822135257 | 4.20996234070795  | H | 4.20760866246523  | -4.07947449668296 | 2.75425452567829  |
| H | -4.60258383509521  | -1.10036989962625 | 3.77895008596010  | H | 4.75257978673719  | -5.16230833264883 | 1.46261783503557  |
| H | -4.59511726819691  | -2.78379596605711 | 4.32805727956260  | H | 1.61733033272457  | -5.09743401592950 | -0.55739494773508 |
| H | -3.11366929219069  | -4.29281115761373 | 1.26954208174147  | H | 2.96427787926827  | -3.99005198945454 | -0.82915945604303 |
| H | -2.13840602216805  | -3.77251527075667 | 2.64323670673995  | H | 3.28047988760241  | -5.69235004525468 | -0.45798126224059 |
| H | -3.68950051409373  | -4.58112536439539 | 2.91531502108433  | H | 4.05083376718855  | 0.49229883917634  | 4.33908187019439  |
| H | -2.403806303930123 | 2.96470930326505  | 3.85200260420410  | H | 3.70185194190428  | 2.10852875036785  | 4.97036201122544  |
| H | -1.58413958211308  | 4.52029735399397  | 3.64741048927573  | H | 4.04092856014714  | 0.77441969263061  | 6.08480996264263  |
| H | -3.34835504822746  | 4.45679885354386  | 3.78266383276524  | H | 0.83459982223737  | -1.06649721848953 | 5.60483635684652  |
| H | -4.01345193080029  | 2.96681094852684  | 0.42309277837323  | H | 2.29470537341340  | -1.40641190069442 | 4.67395311862922  |
| H | -3.82162580024465  | 2.00785703229199  | 1.89116094805235  | H | 2.41115682764607  | -1.06028165336840 | 6.40689166949375  |
| H | -4.73154170438577  | 3.52504338489533  | 1.94014570306521  | H | 4.14021149342513  | 3.88824139465544  | 0.45839720597758  |
| H | 3.03678354654063   | 1.82551911105701  | 4.41933427731633  | H | 4.01111700033823  | 4.53457758676188  | -1.18407334706361 |
| H | 4.62221249962892   | 1.07486948309423  | 4.18795570742024  | H | 4.20760250011015  | 5.63479870987352  | 0.19046736740928  |
| H | 4.50562793180193   | 2.79201905098716  | 4.60419689969751  | H | 0.79698886212834  | 5.23273705074134  | 1.62549946208918  |
| H | 3.25071243977036   | 4.01150371600402  | 1.32395705499733  | H | 2.16704459637866  | 4.23770894503622  | 2.12241797776615  |
| H | 2.17516563878435   | 3.54114746366901  | 2.63996693039069  | H | 2.39287268342794  | 5.96845139324750  | 1.82284298749993  |
| H | 3.65935468704285   | 4.44008350004934  | 2.98950172116394  | H | -2.37748919039319 | -4.59423619841979 | -2.17161323459418 |
| H | -1.76488307943582  | -5.39408540168732 | -2.47805781557181 | H | -2.99997889205492 | 1.99904769476028  | -3.81635415917020 |
| H | 4.10330897458235   | -1.64528985306338 | -3.36198064780485 | H | -3.25425350262905 | 4.28846140195838  | 2.63390516221402  |
| H | 2.39893260348236   | 4.78099901494836  | -2.66760782855310 | H | -3.14623583657361 | -2.50334597772949 | 4.45699754989843  |
| H | -3.61073513297802  | 1.15672833220371  | -3.73616833267592 | H | -2.15428236984918 | 0.29638481086997  | -5.62231994738757 |
| C | 1.01282904382304   | -1.48702234833770 | -4.61199617345696 | N | -2.27949028903520 | 0.73851193546321  | -6.64811771215190 |
| N | 1.84222159713529   | -2.67634747601815 | -4.85294197413790 | C | -1.98525841273801 | -0.30513901163212 | -7.65803816253649 |
| C | 1.1218447753591    | -3.61955607934119 | -5.71415901565728 | C | -1.37378520583147 | 1.90155629392309  | -6.80812973364698 |
| C | -0.19494917919852  | -3.97984504384539 | -5.06000404033894 | C | -0.52357813323278 | -0.68477488113249 | -7.55907714622049 |
| O | -0.98642721463766  | -2.82844874762399 | -4.81802668083737 | H | -2.21690391293286 | 0.09479177143053  | -8.64825179050493 |
| C | -0.29583692425255  | -1.91089364094473 | -3.98366678884003 | C | 0.05901731244712  | 1.42144359840355  | -6.74488555465582 |
| H | 0.81038997285072   | -0.95803208229135 | -5.55390050655867 | H | -3.24771578279693 | 1.04122133571486  | -6.73605401980267 |
| H | 1.54458939236538   | -0.81045009956884 | -3.93916330162292 | H | -1.58152879408140 | 2.37155101928842  | -7.77265027695827 |
| H | 2.69706779613208   | -2.39076692312184 | -5.31969281520689 | H | -2.62453304296008 | -1.16677131756404 | -7.45758638974829 |
| H | 1.72689136022342   | -4.52069853394909 | -5.84566117745714 | H | -1.58034277317524 | 2.61096645034991  | -6.00571849866481 |
| H | 0.93265254255100   | -3.18000502401514 | -6.70359313641778 | H | -0.31983315029457 | -1.14922811951350 | -6.58418923131030 |
| H | -0.00724160015550  | -4.50704850973103 | -4.11543923526255 | H | 0.73406449082850  | 2.25760297810421  | -6.93217015760431 |
| H | -0.77667655031409  | -4.63177040415340 | -5.71469669978422 | O | 0.31258904323313  | 0.44461632589700  | -7.73995002201776 |
| H | -0.11378257562276  | -2.36568432148456 | -3.00047189304806 | H | -0.27700999021017 | -1.39957524502388 | -8.34531542415367 |
| H | -0.95119456094812  | -1.04779052810413 | -3.85115749936850 | H | 0.28035722159441  | 1.01145089546566  | -5.74956331653304 |

## R[4]A:N-methylpiperazine

| CHCl <sub>3</sub> |                   |                   | DMSO              |   |                   |                   |                   |
|-------------------|-------------------|-------------------|-------------------|---|-------------------|-------------------|-------------------|
| C                 | -2.68212810696802 | -2.23883652070157 | 2.45047872264987  | C | -0.18906366240389 | -3.31806672876471 | 0.14879467131873  |
| C                 | -3.11894624877130 | -3.21487344252896 | 1.55922699863926  | C | -1.18592541257472 | -4.15429930429338 | -0.34854681482190 |
| C                 | -2.27190609689501 | -4.21038545887636 | 1.10570197363280  | C | -1.68390763659346 | -4.00384065757604 | -1.63153161126692 |
| C                 | -0.95321740494680 | -4.25170860717849 | 1.54264428370126  | C | -1.18293586063838 | -3.00806132698438 | -2.46442374466738 |
| C                 | -0.48213010280800 | -3.30612345363639 | 2.46007187831730  | C | -0.15723766711468 | -2.16751776693749 | -2.01378814803400 |
| C                 | -1.35942792241121 | -2.30886401708951 | 2.86293465533992  | C | 0.28538627735160  | -2.33433242266568 | -0.70732583846457 |
| O                 | -4.42324401583216 | -3.14465334283887 | 1.13239876471813  | O | -1.66393785514182 | -5.13732768296273 | 0.48258560187857  |
| O                 | -0.15852219531265 | -5.23225399027711 | 1.04428176902225  | O | -1.71224301013567 | -2.92288047288805 | -3.70972332594182 |
| C                 | 0.92461798118818  | -3.38794700334267 | 3.01420291583988  | C | 0.46035541620969  | -1.12174271838157 | -2.91911924787180 |
| C                 | 1.86369736199840  | -2.41485600387079 | 2.33513247917215  | C | -0.24038588871012 | 0.21258943909093  | -2.76110460040780 |
| C                 | 2.46634755361933  | -2.75380530829415 | 1.12245373001815  | C | -1.34422323520440 | 0.52595101738349  | -3.56182027800903 |
| C                 | 3.39606532896200  | -1.90687914892557 | 0.54169275751610  | C | -2.00126863366294 | 1.73955997196469  | -3.40262574030789 |
| C                 | 3.66629554346160  | -0.65979041088877 | 1.09020264434195  | C | -1.56694855408475 | 2.66721731244088  | -2.46338472971718 |
| C                 | 3.02352888278457  | -0.25428231808462 | 2.26460280711981  | C | -0.45621778896294 | 2.39124556067868  | -1.65896615663924 |
| C                 | 2.14983294993821  | -1.16075378852872 | 2.85786361835071  | C | 0.15699582368691  | 1.15346440833783  | -1.82167811778360 |
| O                 | 2.11315460722800  | -3.90177972492341 | 0.47213393323065  | O | -1.78003597269465 | -0.37619373363631 | -4.47445764166912 |
| C                 | 3.24145292286199  | 1.13139760885734  | 2.84649538471990  | C | 0.06401754132508  | 3.39076012534860  | -0.64194826178485 |
| C                 | 2.31186671678126  | 2.10875694114832  | 2.14736526325358  | C | -0.61051839882365 | 3.16006197064714  | 0.69747847138020  |
| C                 | 2.75262745081103  | 2.87802061816306  | 1.07243924426598  | C | -1.75100978748061 | 3.87641305542344  | 1.05631643831142  |
| C                 | 1.89548610765405  | 3.71204824340823  | 0.37773609497064  | C | -2.39612200051388 | 3.65249073675521  | 2.25968255493545  |
| C                 | 0.56678161785301  | 3.82869070871291  | 0.76806700994778  | C | -1.89779758991910 | 2.71248411760751  | 3.15501525665771  |
| C                 | 0.0990833538931   | 3.12998280145144  | 1.88582657184073  | C | -0.73253647092767 | 1.99912384377286  | 2.85296790578575  |
| C                 | 0.98138662679571  | 2.25863134947763  | 2.51441339865637  | C | -0.14668928082521 | 2.22531469578402  | 1.61257655238559  |
| O                 | 4.07695943541357  | 2.77863831046283  | 0.71832259774892  | O | -2.21548135366058 | 4.81867620045773  | 0.17290364950975  |
| O                 | -0.20975985386286 | 4.66691488745863  | 0.03465669517167  | O | -2.58063152424657 | 2.56659183883264  | 4.32060421019837  |
| C                 | -1.30088769278264 | 3.35197031506231  | 0.24076327082203  | O | -0.10207533695477 | 1.04246757056265  | 3.84998312710796  |
| C                 | -2.26315131683336 | 2.30215116553347  | 1.91381211469193  | C | -0.60149224218949 | -0.37090064896236 | 3.62182282865771  |
| C                 | -2.98463180181570 | 2.51632196953779  | 0.74193535156318  | C | -1.70845671031852 | -0.85160136151192 | 4.31864835705031  |
| C                 | -3.85849739585980 | 1.56672202237555  | 0.24358739454821  | C | -2.20163391592356 | -2.12636696508508 | 4.10437891701957  |
| C                 | -4.04457700130280 | 0.36651904716421  | 0.92008244441545  | C | -1.58002756024473 | -2.96970802132235 | 3.18968130543696  |
| C                 | -3.36685413024049 | 0.12483338585925  | 2.11959270576930  | C | -0.43976464378042 | -2.54355189562516 | 2.50020867083499  |
| C                 | -2.47394652066752 | 1.09335473591578  | 2.56056065872357  | C | -0.00710721259269 | -1.23972444330928 | 2.71766313318803  |
| O                 | -2.80090656432074 | 3.70945155243904  | 0.08858343556613  | O | -2.29522417956608 | -0.01592332556219 | 5.23537982787411  |
| O                 | -4.92197808970790 | -0.50770104690734 | 0.36714441590331  | O | -2.11990991663465 | -4.20798158858075 | 3.04481377929843  |
| C                 | -3.61182667323875 | -1.13926692633126 | 2.92010539690813  | C | 0.31759381187003  | -3.47298400146768 | 1.56874764375215  |
| C                 | 0.92554512246771  | -3.27586685425551 | 4.54136338729745  | C | 1.97826674914588  | -1.02282314500889 | -2.74437498640718 |
| C                 | 3.14280575753284  | 1.14928519340850  | 4.37660142772088  | C | 1.59767427430086  | 3.40247923132039  | -0.57886539346421 |
| C                 | -1.28231046477596 | 3.50523917278946  | 3.95929439891593  | C | 1.42715881864085  | 1.17877117682246  | 3.7582801611392   |
| C                 | -3.56355759560044 | -0.88263710429739 | 4.43227959605895  | C | 1.83712622618968  | -3.31507834829859 | 1.72344182785400  |
| C                 | 2.27544061660437  | -3.51952188397959 | 5.21450366511764  | C | 2.66703002351678  | -0.25351175195523 | -3.87365906527103 |
| C                 | 3.85428189643814  | 2.31256451048248  | 5.06816599640658  | C | 2.22529734420609  | 4.69783730523159  | -0.06386312669214 |
| C                 | -2.4388994459832  | 4.31024514434020  | 4.55281054978772  | C | 2.09849699380926  | 0.76292389251563  | 5.18501874707545  |
| C                 | -4.31627580288563 | -1.89655076667012 | 5.29444665887635  | C | 2.66628041814417  | -4.53568827454295 | 1.323536807101237 |
| O                 | 4.56689776719828  | 0.10316402352860  | 0.41754556277468  | O | -2.26413402192910 | 3.83475474144835  | -2.40021023294390 |
| C                 | 2.13430289948644  | -3.32833227104592 | 6.71991579257292  | C | 4.00205610665756  | 0.31226651248059  | -3.40796067598966 |
| C                 | 2.83761345818777  | -4.89972396486055 | 4.89693846035392  | C | 2.85892404694641  | -1.13463788887415 | -5.10251943968771 |
| C                 | -4.37978232729923 | -1.38444720364053 | 6.72944501040685  | C | 4.12283094579986  | -4.30253648727245 | 1.70992092176484  |
| C                 | -3.71783508582828 | 2.39814030414702  | 5.26438985571263  | C | 2.56837350133177  | -4.89400203106231 | -0.15466478692100 |
| C                 | -2.18515616224370 | 4.53420884557513  | 6.03972462609460  | C | 3.58062601959844  | 1.11705086945725  | 5.12498277556093  |
| C                 | -3.80932779596756 | 3.67666134951604  | 4.34496759068525  | C | 1.92552874916584  | -0.71137794964907 | 5.53012939903257  |
| C                 | 3.85503050956706  | 2.07741732371099  | 6.57502804864156  | C | 3.74273110766827  | 4.59970381295694  | -0.17726804783324 |
| C                 | 3.25731682206292  | 3.67895433348236  | 4.7524222329790   | C | 1.83090683060176  | 5.05525568660243  | 1.36401271259706  |
| H                 | -0.99424268839416 | -1.55332677966390 | 3.55014755801414  | H | 1.06677510537621  | -1.67455910580751 | -0.34770933852507 |
| H                 | -4.59105500901223 | -3.82452723947722 | 0.46984560288907  | H | -2.38335702047338 | -5.61635348148014 | 0.05371226073080  |
| H                 | 0.74978665094590  | -4.86229595839733 | 0.94096821589631  | H | -1.65700334397401 | -1.99729456827397 | -4.05070049236897 |
| H                 | 1.29125956004206  | -4.39093197841647 | 2.78295178245787  | H | 0.28402450080598  | -1.44625103686299 | -3.94933453519487 |
| H                 | 1.66614942823384  | -0.87129363850810 | 3.78365591427371  | H | 1.01050971189175  | 0.92649676798046  | -1.19294367067462 |
| H                 | 1.85846100216021  | -3.63700993090047 | -0.49920566553901 | H | -0.22571222762320 | 4.38829870236665  | -0.98834713155326 |
| H                 | 4.26945469381410  | 1.42841078095866  | 2.61303122812465  | H | 0.74516669707788  | 1.66116499443601  | 1.36244824260033  |
| H                 | 0.61588185162962  | 1.68838580137400  | 3.36188078111928  | H | -3.03106217809794 | 5.21526947129330  | 5.02025742212968  |
| H                 | 4.24769808424950  | 3.30005295397267  | -0.07473495992252 | H | -2.42406475864869 | 1.68308351875667  | 4.70726914622750  |
| H                 | -1.14749625724501 | 4.40386903581780  | 0.09779701374585  | H | -0.43910170294323 | 1.35060943463751  | 4.84514045497413  |
| H                 | -1.64260655780143 | 4.31911405183484  | 2.04709554632801  | H | 0.86606337622969  | -0.89806502879419 | 2.17313764213789  |
| H                 | -1.93891823066352 | 0.90473221888432  | 3.48374945086012  | H | -3.07954828002868 | -0.43248055603746 | 5.61256805257944  |

|   |                   |                    |                   |   |                   |                   |                   |
|---|-------------------|--------------------|-------------------|---|-------------------|-------------------|-------------------|
| H | -3.31351608738507 | 3.72378678036211   | -0.72755953827518 | H | -1.89506575414203 | -4.58920766122262 | 2.17390293697278  |
| H | -4.79933831926002 | -1.41133124163824  | 0.71311338818357  | H | 0.09642783702632  | -4.49703191947537 | 1.88639027571957  |
| H | -4.63715048207545 | -1.46058549782266  | 2.71070185217547  | H | 2.39346018867097  | -2.03671610186301 | -2.69615854595588 |
| H | 0.20406187814385  | -4.00788377250004  | 4.92572521677994  | H | 2.22270754732505  | -0.55589670293455 | -1.78558209172096 |
| H | 0.55024368783378  | -2.29535388301460  | 4.85353667649807  | H | 1.96917997265892  | 3.23512655582666  | -1.59556542211014 |
| H | 3.59299816262153  | 0.22034569936633   | 4.74310429598999  | H | 1.97417958895608  | 2.56449363813980  | 0.01818591922417  |
| H | 2.09704201833912  | 1.12685334328858   | 4.70353709338919  | H | 1.66455357414273  | 2.23404794224797  | 3.70290062599321  |
| H | -0.35162128578750 | 4.01953926039931   | 4.22137448838512  | H | 1.88659808378378  | 0.62901911509230  | 3.04709390876171  |
| H | -1.23213165418850 | 2.52957991941952   | 4.45526718735730  | H | 2.03738657521261  | -3.11107139287276 | 2.78082920758024  |
| H | -4.00965713531435 | 0.10184890720661   | 4.61042159129877  | H | 2.20111073058217  | -2.43903150472000 | 1.17533240174356  |
| H | -2.52858994818774 | -0.81441385600223  | 4.78643680133843  | H | 2.02115381798549  | 0.59028301901391  | -4.15195742100624 |
| H | 2.98571301595916  | -2.77058632855863  | 4.84358608123957  | H | 1.88626005575155  | 5.51006396114898  | -0.72172259376851 |
| H | 4.89804861728249  | 2.30935179235835   | 4.72477321087522  | H | 1.64060926761355  | 1.35554238877826  | 5.98926713616141  |
| H | -2.44045697724608 | 5.29102205444955   | 4.05713783652230  | H | 2.29227366925127  | -5.38939260730083 | 1.90555408788325  |
| H | -5.34381111623957 | -1.95594328839082  | 4.90960718595131  | H | -2.18389387818110 | 4.24551645210702  | -1.51795206709878 |
| H | 4.46720701867513  | 1.05138768576132   | 0.62398197214110  | H | 3.86745260981938  | 0.99988170299643  | -2.56707357690765 |
| H | 1.75321194612100  | -2.33046718687033  | 6.95818687075543  | H | 4.66983047873670  | -0.49204598137198 | -3.07945991865951 |
| H | 1.43733689032847  | -4.06183787114926  | 7.14025489319028  | H | 4.50547455470051  | 0.85518329688927  | -4.21347432381117 |
| H | 3.09547799487642  | -3.45253115172328  | 7.22689312535609  | H | 3.55045472528598  | -1.95391690484113 | -4.87723072347689 |
| H | 2.12452074838765  | -5.68240798966658  | 5.17910938968699  | H | 1.91685612736111  | -1.57546126507082 | -5.44017536489591 |
| H | 3.0631028777630   | -5.01764836029132  | 3.83383895904105  | H | 3.27378205234588  | -0.56318164582885 | -5.93770687512486 |
| H | 3.76477004956206  | -5.07659815887901  | 5.44959121121377  | H | 4.53759034741834  | -3.45891614253754 | 1.14711963362985  |
| H | -3.3723013859513  | -1.30005351231099  | 7.15165031237448  | H | 4.22209891513060  | -4.07546299672579 | 2.77558375507240  |
| H | -4.84783580902641 | -0.39702877545761  | 6.78102290195794  | H | 4.73469929780002  | -5.18237581813312 | 1.49112514216650  |
| H | -4.95177480397375 | -2.06487124982080  | 7.36657162685978  | H | 1.55042285942000  | -5.15522485263379 | -0.45043991540096 |
| H | -3.74516904581621 | -3.74001664477207  | 4.26684742070037  | H | 2.88823549657610  | -4.05145171881672 | -0.77756740854486 |
| H | -2.67114838926025 | -3.27814170596559  | 5.58724279306641  | H | 3.21621145794369  | -5.74594560294943 | -0.38217097826617 |
| H | -4.26567125639423 | -3.95981888271866  | 5.94193384234446  | H | 4.07906074156979  | 0.54802339605367  | 4.33231828011831  |
| H | -2.17536487315778 | 3.57827351754178   | 6.57490136384635  | H | 3.72877734076658  | 2.18104425441297  | 4.91783301010729  |
| H | -1.22279177902964 | 5.02501405331908   | 6.21213788425782  | H | 4.08078678481037  | 0.88196952618019  | 6.06892304406885  |
| H | -2.96760770497182 | 5.15596283769322   | 6.48393435764192  | H | 0.87686737663249  | -0.98233914181169 | 5.66746104950154  |
| H | -4.06570304198907 | 3.58176357207148   | 3.28805880052611  | H | 2.32936829965160  | -1.34562814684717 | 4.73333049942667  |
| H | -3.84272966156734 | 2.67384521381993   | 4.78422041776344  | H | 2.46036334057772  | -0.94994826604938 | 6.45449815995733  |
| H | -4.58327911924511 | 4.28102601371127   | 4.82761515059887  | H | 4.12405765767578  | 3.80263653427365  | 0.47072401406015  |
| H | 2.83038304839303  | 2.06501719599629   | 6.96292365508033  | H | 4.05428520974839  | 4.37601182501139  | -1.20207485139245 |
| H | 4.32047405079310  | 1.12086753961460   | 6.83045478280967  | H | 4.22164283763430  | 5.53462761576397  | 0.12749941993430  |
| H | 4.39892750360384  | 2.86948023134804   | 7.09753315636736  | H | 0.75847793406298  | 5.23376305654929  | 1.46398061639637  |
| H | 3.32366634640965  | 3.92562047678065   | 3.69122518862642  | H | 2.09750397023831  | 4.24719507558452  | 2.05400257349846  |
| H | 2.19856646470509  | 3.71220765412992   | 5.03244576836465  | H | 2.35506313558555  | 5.96037108135862  | 1.68556332268241  |
| H | 3.77809076051508  | 4.46031349706307   | 5.31401984120414  | H | -2.4722299697823  | -4.65458386489516 | -1.99662269765710 |
| H | -2.61641040828488 | -4.95064452367040  | 0.39010971782773  | H | -2.87483506998317 | 1.96747332671124  | -4.00350179374387 |
| H | 3.88341558992765  | -2.19298364810780  | -0.38370987617927 | H | -3.29400216843910 | 4.20598100473677  | 2.51727507766020  |
| H | 2.24638167794589  | 4.28068374764125   | -0.47795166941702 | H | -3.07571367981011 | -2.47884955275654 | 4.64329756847561  |
| H | -4.40224603715513 | 1.74339424197682   | -0.67937187382481 | H | -2.04283331915774 | 0.07221171846502  | -5.39819600601825 |
| N | 1.24165444812184  | -3.27022801934175  | -1.93751127704579 | N | -2.32693971624437 | 0.56411217573265  | -6.80490710774818 |
| C | 1.74781997771648  | -2.10658736322062  | -2.67613470360064 | C | -1.51092756769385 | -0.25564076743401 | -7.70856083427022 |
| C | -0.21519499697041 | -3.16584440022876  | -1.79056531389438 | C | -2.06713321240312 | 1.98906029004017  | -7.03766086366363 |
| C | 1.35652575190071  | -0.81871180673887  | -1.98087437289896 | C | -0.04675445549237 | 0.06055581518305  | -7.48991001151767 |
| H | 1.34563548501211  | -2.10393799636888  | -3.69888482326681 | H | -1.78038120754590 | -0.06204550407025 | -8.75509396442320 |
| C | -0.55980215811311 | -1.89020552784022  | -1.05421167509589 | C | -0.59662608518423 | 2.28174097775350  | -6.83375978292714 |
| H | -0.57446870510877 | -4.02977051781516  | -1.22883483459060 | H | -3.30948564994601 | 0.37326807017023  | -6.97577704976751 |
| H | 1.45441064094053  | -4.10630924281798  | -2.47342905372659 | H | -2.35664172838805 | 2.26783447691579  | -8.05963181896019 |
| H | -0.70411777200145 | -3.192063943338534 | -2.77481724981261 | H | -1.70051169141220 | -1.30987864023435 | -7.49259507686868 |
| H | 2.83708671496568  | -2.17207227917043  | -2.73760818248524 | H | -2.66673759628408 | 2.57651850980733  | -6.33933006417525 |
| N | -0.08325810304711 | -0.72772076480859  | -1.78828753762544 | H | 0.23786292846176  | -0.22832546626092 | -6.46187585824221 |
| H | 1.68332484986784  | 0.02703839429929   | -2.59384003144912 | H | -0.40704361590047 | 3.33852122730617  | -7.04212715496927 |
| H | 1.88127415109811  | -0.75019849496586  | -1.01433147417036 | N | 0.21678664159698  | 1.47139430137649  | -7.72693877449460 |
| H | -0.13015868909584 | -1.92472688213042  | -0.03739512124031 | H | 0.55953961953489  | -0.53390859728249 | -8.17909032013805 |
| H | -1.64566608142505 | -1.81727818658303  | -0.94319390147468 | H | -0.32615808252658 | 2.09719405647792  | -5.77720659270895 |
| C | -0.40813866346446 | 0.48821472165797   | -1.06857423732799 | C | 1.62324446346404  | 1.77151756094140  | -7.55056239522980 |
| H | 0.07530355762802  | 0.52667811393112   | -0.07617405342547 | H | 1.96694655733993  | 1.57659215032935  | -6.51991134038768 |
| H | -1.48850049236987 | 0.55809594976767   | -0.92231614907203 | H | 1.80732851305891  | 2.82445876694932  | -7.77907889256488 |
| H | -0.07647145167211 | 1.35922201855253   | -1.64029005975517 | H | 2.22003071049791  | 1.15893063765740  | -8.23103461094546 |

## R[4]A:dipropylamine

## R[4]A:diisopropylamine

| DMSO |                   |                   | DMSO              |   |                   |                    |                   |
|------|-------------------|-------------------|-------------------|---|-------------------|--------------------|-------------------|
| C    | -0.54894533414278 | -3.83697226838031 | 0.45577138441533  | C | 0.24680831404755  | -3.28813363794180  | -0.19395472925174 |
| C    | -0.75463221619290 | -4.60350145729316 | -0.68720678772490 | C | -0.85971055596321 | -4.06973279831546  | 0.12356839544253  |
| C    | 0.27637887266291  | -5.31635401444718 | -1.27688634803883 | C | -1.44201038793705 | -4.02534331290871  | 1.37988922834128  |
| C    | 1.55614673569532  | -5.28969132080194 | -0.72579108294016 | C | -0.92268973818218 | -3.19077344395668  | 2.36841978700290  |
| C    | 1.79352235479081  | -4.55691259242647 | 0.44812272677284  | C | 0.21306415378043  | -2.41185982715558  | 2.09396935510054  |
| C    | 0.73583736133708  | -3.83354955577959 | 0.98342821631841  | C | 0.74320019492683  | -2.46911336116035  | 0.81211207929671  |
| O    | -2.02163019888835 | -4.62295846203446 | -1.22000696300858 | O | -1.36397465844066 | -4.88709427589395  | -0.86117855692010 |
| O    | 2.51911733975550  | -6.00112987022362 | -1.34745667972981 | O | -1.53417837761500 | -3.18372623304008  | 3.56968529217181  |
| C    | 3.16047276286229  | -4.56506387542456 | 1.10658144793110  | C | 0.83204555759930  | -1.53795058168802  | 3.16924434297727  |
| C    | 4.03302285954120  | -3.45014983548159 | 0.56817753943854  | C | 0.22071054049069  | -0.15223015058456  | 3.16067432744450  |
| C    | 4.79695395007653  | -3.67477645726177 | -0.59719823000116 | C | -0.96814957824520 | 0.08103800676264   | 3.88760127762487  |
| C    | 5.57612036465789  | -2.62293114256076 | -1.09400205914966 | C | -1.53003746013274 | 1.36339651952003   | 3.84399771417659  |
| C    | 5.60945697994659  | -1.38299213769916 | -0.46726167557398 | C | -0.94361384332213 | 2.39236296169507   | 3.11663583444469  |
| C    | 4.87928198566691  | -1.15388302042371 | 0.70201637084461  | C | 0.24485153364993  | 2.18209962618212   | 2.41190024558803  |
| C    | 4.09176614381346  | -2.20338776161852 | 1.16928917545512  | C | 0.77786102307150  | 0.89548763357717   | 2.44669128952419  |
| O    | 4.77102536744348  | -4.85037597217965 | -1.21320594098026 | O | -1.53880774083693 | -0.88550429364258  | 4.59078026344940  |
| C    | 4.92328178015810  | 0.17887875967805  | 1.42769005581398  | C | 0.92165004628295  | 3.29045220525175   | 1.62362962828567  |
| C    | 3.82645664053607  | 1.08609497712735  | 0.90239601403651  | C | 0.39558888056427  | 3.29886658902716   | 0.20049945063012  |
| C    | 4.08355572477249  | 2.01585046092249  | -0.10119648454923 | C | -0.65065505619102 | 4.13681728810707   | -0.17404465349194 |
| C    | 3.07991496898563  | 2.81105232281552  | -0.62893975640012 | C | -1.17428868391018 | 4.11398733992790   | -1.45606439840830 |
| C    | 1.77425023391266  | 2.70506029753844  | -0.15287276741161 | C | -0.65041260933629 | 3.25047940366966   | -2.41684389155676 |
| C    | 1.48501808122944  | 1.80741107491848  | 0.88566081120315  | C | 0.43228398149420  | 2.42069028910074   | -2.08739162275537 |
| C    | 2.51696423510639  | 1.00765810390929  | 1.35977505932514  | C | 0.89917632174190  | 2.45288298968226   | -0.77994106156573 |
| O    | 5.37650190811709  | 2.11614268607897  | -0.55944361975945 | O | -1.15574453053746 | 4.98994001406697   | 0.77993829822556  |
| O    | 0.83676811594468  | 3.50129836404659  | -0.70592653460793 | O | -1.20461277742542 | 3.27107112248994   | -3.64601247953120 |
| C    | 0.09205940413750  | 1.72919101993184  | 1.48429200773710  | C | 1.07928057227783  | 1.52750559773057   | -3.13201734256508 |
| C    | -0.74403178674989 | 0.69615499558413  | 0.75555548260902  | C | 0.40734824695667  | 0.16986194245340   | -3.15351350557429 |
| C    | -1.45863179405044 | 1.08747312331824  | -0.39842734711060 | C | -0.73515792909419 | -0.101011463827440 | -3.96588128560722 |
| C    | -2.23283397780175 | 0.12823196112671  | -1.06062289906466 | C | -1.35873499510598 | -1.26400448786964  | -3.96330688211989 |
| C    | -2.29683453890661 | -1.18709155118217 | -0.61622783775956 | C | -0.87602885867704 | -2.31563321993219  | -3.19299421151957 |
| C    | -1.59900188855834 | -1.58890949084961 | 0.52607958634150  | C | 0.26692604786617  | -2.15932647649946  | -2.40581678468624 |
| O    | -0.82041677850315 | -0.62443180125099 | 1.16339874505251  | C | 0.85793734180807  | -0.89701748942790  | -2.39659128501433 |
| O    | -1.39599912611168 | 2.33354015548978  | -0.84954118869850 | O | -1.20312456542621 | 0.98241129905800   | -4.70704330884632 |
| O    | -3.08434294489430 | -2.03718788537061 | -1.34245932792968 | O | -1.56677300630153 | -3.49309887848642  | -3.27153031384819 |
| C    | -1.67114301126848 | -3.01099361995754 | 1.05452976538472  | C | 0.84247632973763  | -3.30241371997103  | -1.58809073014004 |
| C    | 3.06520624911298  | -4.57889341031669 | 2.63345584352509  | C | 2.36044154313218  | -1.53138500018391  | 3.10165978658560  |
| C    | 4.92405883273517  | 0.00668025040421  | 2.95347642857660  | C | 2.45117573842004  | 3.22084037846120   | 1.72994941562861  |
| C    | 0.14170254761361  | 1.58389223755861  | 3.01103967374735  | C | 2.60683187306017  | 1.50142798973380   | -2.99432935166826 |
| C    | -1.73787631811826 | -3.05288571305676 | 2.58742115530145  | C | 2.37715737672784  | -3.31352711584692  | -1.61829531721519 |
| C    | 4.39418988130090  | -4.80538285442969 | 3.35272424819678  | C | 3.04779194908675  | -0.84791885775637  | 4.28327559811865  |
| C    | 5.53638358506351  | 1.16406008648841  | 3.74281492060938  | C | 3.19783619075963  | 4.52425808333178   | 1.44384551388107  |
| C    | -1.09701134418740 | 2.08006358470297  | 3.76014078624009  | C | 3.37258440611241  | 1.18215891363984   | -4.27979412924295 |
| C    | -2.36099713283221 | -4.31441357016393 | 3.18614970666972  | C | 3.03822478898899  | -4.65894693213729  | -1.31731862649218 |
| O    | 6.40127173240170  | -0.43069513747337 | -1.04429424857389 | O | -1.57854189885780 | 3.60205910996590   | 3.15375888755193  |
| C    | 4.23052401000203  | -4.54742456366536 | 4.84575533557621  | C | 4.53634730375775  | -0.68780908011264  | 3.99719255706440  |
| C    | 4.94157303883677  | -6.20653550302310 | 3.10981067827696  | C | 2.83183004967314  | -1.60603426828711  | 5.58771019041458  |
| C    | -2.51365262053866 | -4.13803998816534 | 4.69329245202792  | C | 4.53913462057502  | -4.54900563532463  | -1.56621087933352 |
| C    | -1.58761172444015 | -5.59262445136390 | 2.88482045233825  | C | 2.77936116214942  | -5.17750945002017  | 0.09256821216348  |
| C    | -0.78571673071265 | 2.18026513277263  | 5.24996393812063  | C | 4.86499661426105  | 1.39711509748442   | -4.05146362425693 |
| C    | -2.33520710607985 | 1.21901798034477  | 3.54372354413280  | C | 3.12312694953593  | -0.22029740648676  | -4.82136732043403 |
| C    | 5.65607178467845  | 0.76834298794473  | 5.21086248395617  | C | 4.67575020246553  | 4.33964771069855   | 1.77285799316651  |
| C    | 4.76902562157024  | 2.47430415879035  | 3.61355171902503  | C | 3.04178562008661  | 5.03146581931887   | 0.01466169141754  |
| H    | 0.91685300618689  | -3.24588734367694 | 1.87737288050428  | H | 1.60637195011905  | -1.85153915265771  | 0.58623420038668  |
| H    | -2.03127091804016 | -5.14037650470962 | -2.03426144756408 | H | -2.16845163534829 | -5.32200449726434  | -0.55360936116235 |
| H    | 3.43342666539711  | -5.56324885931804 | -1.22334265455067 | H | -1.46661556027399 | -2.25568112441291  | 4.00666353974385  |
| H    | 3.63967454014612  | -5.50314401382690 | 0.80624421420751  | H | 0.55529935858285  | -1.99065219993063  | 4.12764411525323  |
| H    | 3.50801858852827  | -2.03643276688580 | 2.07006939610136  | H | 1.69662724135856  | 0.71429728481327   | 1.89636339441866  |
| H    | 5.88377799098591  | 0.65003238712280  | 1.18790797739417  | H | 0.63841761680288  | 4.24337761865202   | 2.08616700405125  |
| H    | 2.29045053747013  | 0.29916665349786  | 2.15092924504614  | H | 1.72047842443997  | 1.79353909295997   | -0.51576378879968 |
| H    | 5.41893771915246  | 2.73716143499224  | -1.29674668172445 | H | -1.91896843114085 | 5.46599382988777   | 0.43065472387592  |
| H    | -0.07774097824132 | 3.04225453652706  | -0.69138203391848 | H | -1.13898750611528 | 2.34978760400908   | -4.09046975637582 |
| H    | -0.38368311503562 | 2.69902521539487  | 1.29018196522265  | H | 0.87141191724331  | 1.98977314505227   | -4.10537977822743 |
| H    | -0.27064225683497 | -0.92474421241782 | 2.05067359098526  | H | 1.74231268238516  | -0.75917680767765  | -1.78189119707380 |
| H    | -2.78245650345595 | -2.95862866119513 | -1.23961844815514 | H | -1.43167030956165 | -4.02782965577221  | -2.46723564204538 |
| H    | -2.61800417858326 | -3.44194530894122 | 0.70872474665517  | H | 0.53348679902868  | -4.23763921644855  | -2.06941150177893 |



|   |                   |                   |                   |   |                   |                   |                   |
|---|-------------------|-------------------|-------------------|---|-------------------|-------------------|-------------------|
| H | 2.36340864910844  | -5.37080643394623 | 2.92858787331157  | H | 2.70803801248697  | -2.57175155934787 | 3.04314567579151  |
| H | 2.62726933478900  | -3.64296147129165 | 2.99762438014415  | H | 2.70090730580758  | -1.05024211461843 | 2.17800521405409  |
| H | 5.50579674321528  | -0.89479886257174 | 3.17994195805155  | H | 2.69122322929986  | 2.91948379239834  | 2.75673211425421  |
| H | 3.91245610088928  | -0.18699868607662 | 3.33061211033368  | H | 2.85669654111362  | 2.43036193537056  | 1.08667352320826  |
| H | 0.99683012980183  | 2.17356506924707  | 3.36326070022193  | H | 2.92402555419885  | 2.49781691271174  | -2.66308291109609 |
| H | 0.35104225231876  | 0.54994481562523  | 3.31233694136063  | H | 2.92693099461014  | 0.81202804645944  | -2.20350749812838 |
| H | -2.34337964191010 | -2.19779261230409 | 2.91040548201361  | H | 2.68388552297861  | -3.01171012804362 | -2.62692221494737 |
| H | -0.74620989250226 | -2.89882266671905 | 3.03029774482899  | H | 2.79129887658461  | -2.55460736667338 | -0.94340685285380 |
| H | 5.12026818029145  | -4.07996470125239 | 2.96098799352403  | H | 2.61382074467852  | 0.15532089163456  | 4.39354799561198  |
| H | 6.55172928569283  | 1.32590110818425  | 3.35128055757256  | H | 2.79229192791805  | 5.29033862729025  | 2.12136962897636  |
| H | -1.31853281876023 | 3.09290199042962  | 3.39139012211552  | H | 3.03974188315832  | 1.90236098296761  | -5.04218514981480 |
| H | -3.36738676640717 | -4.41878053439045 | 2.75394653820387  | H | 2.62913621596713  | -5.39202083222253 | -2.02840374677779 |
| H | 6.09870523232214  | 0.46517006904219  | -0.80482096700828 | H | -1.36233916853527 | 4.13340508325846  | 2.36466696183148  |
| H | 3.88568223426689  | -3.52553782858657 | 5.03518558846738  | H | 4.70363684231487  | -0.09645134819761 | 3.09088107589429  |
| H | 3.49464634994474  | -5.23455799167634 | 5.28005148804684  | H | 5.01041861368749  | -1.66558153737600 | 3.85075356000511  |
| H | 5.17539934407286  | -4.69007970829075 | 5.37965966944823  | H | 5.04929699156349  | -0.18899657233455 | 4.82553600303229  |
| H | 4.23926679736957  | -6.96168874367935 | 3.48214533582843  | H | 3.24081463577745  | -2.62069457136154 | 5.51465244082334  |
| H | 5.11418920394546  | -6.40425591612267 | 2.04848373784409  | H | 1.77258902938623  | -1.68896655732761 | 5.84580418571961  |
| H | 5.89464071870052  | -6.35024295172911 | 3.62856811583124  | H | 3.33378302503255  | -1.10165237104600 | 6.41948719383709  |
| H | -1.53123161051112 | -4.04201008466066 | 5.17034332377711  | H | 4.99009496176866  | -3.82361468308934 | -0.87874106765603 |
| H | -3.09213231558211 | -3.24039845528094 | 4.93442217976776  | H | 4.75179325806155  | -4.21784933867516 | -2.58773962339067 |
| H | -3.01892179926329 | -4.99841773895545 | 5.14298567900532  | H | 5.03849355529574  | -5.51038305684954 | -1.41030004877108 |
| H | -1.54438869728077 | -5.80610064835759 | 1.81454469772159  | H | 1.71932927865717  | -5.36831347144832 | 0.27393867323843  |
| H | -0.55587422622727 | -5.51620291003357 | 3.24694040324727  | H | 3.11515405501972  | -4.45021457191508 | 0.84069432439948  |
| H | -2.05716593830989 | -6.44747383886114 | 3.38245898858269  | H | 3.32570500824290  | -6.11129583632909 | 0.26153109873919  |
| H | -0.54160123873237 | 1.19277960172423  | 5.65919597894588  | H | 5.24144548813732  | 0.70445020420125  | -3.28953936854639 |
| H | 0.06798799368585  | 2.83959334256729  | 5.43651994335019  | H | 5.07430680655367  | 2.41571014282877  | -3.70920517937244 |
| H | -1.64320095844769 | 2.56865354208559  | 5.80848633877419  | H | 5.43525409596975  | 1.22384928227829  | -4.96951390548420 |
| H | -2.61732865673903 | 1.16449082906124  | 2.49100055140184  | H | 2.07274727388197  | -0.38312185310747 | -5.07176152412254 |
| H | -2.15514341474843 | 0.19382629872203  | 3.88797247859203  | H | 3.40358998616310  | -0.97722456653921 | -4.07990104866636 |
| H | -3.18442030125874 | 1.61983639325430  | 4.10704348940054  | H | 3.72084798760082  | -0.39301001228674 | -3.28931468308934 |
| H | 4.66444426378594  | 0.58818871525535  | 5.64234855352383  | H | 5.12266225723628  | 3.58091390306553  | 1.11968847605189  |
| H | 6.24410270559043  | -0.14716343977302 | 5.33119200180530  | H | 4.81770932469450  | 4.01453519212481  | 2.80855895528051  |
| H | 6.13555391674169  | 1.55913928626261  | 5.79616541851231  | H | 5.23216105510741  | 5.27125039126218  | 1.63002303546288  |
| H | 4.73899636704629  | 2.83505775810961  | 2.58306888641672  | H | 2.00505289386934  | 5.27571858367658  | -0.22686592889833 |
| H | 3.73284755677964  | 2.35154985130958  | 3.94989229171838  | H | 3.37756291031178  | 4.27500602683434  | -0.70406901550601 |
| H | 5.23312251278834  | 3.25034736295517  | 4.23103955347359  | H | 3.64647584024884  | 5.93165595182521  | -1.3693080529778  |
| H | 0.09956657715835  | -5.89419772411695 | -2.18047474694136 | H | -2.31684774088892 | -4.63095848361944 | 1.60295410627343  |
| H | 6.14806514574243  | -2.76395607505031 | -2.00671468102053 | H | -2.45755023152686 | 1.55756690867212  | 4.37534388268371  |
| H | 3.29971425176590  | 3.51755635520582  | -1.42528406543771 | H | -2.00454435157063 | 4.76278905527847  | -1.72346081249801 |
| H | -2.77821734898857 | 0.41108824245985  | -1.95704674540196 | H | -2.25435336659401 | -1.41938788123912 | -4.55784639883514 |
| N | -3.51379723771508 | 3.59986717075679  | -1.53885147824531 | N | -2.36528203661099 | 0.58526405028060  | -6.98734920925885 |
| C | -4.73863666495156 | 3.06329420040280  | -0.89909332402465 | C | -1.73245687072874 | -0.61115931054889 | -7.62408175765814 |
| C | -3.54769326766767 | 3.63773002574058  | -3.01858602816186 | C | -3.86370452120151 | 0.56839355248363  | -6.88742148582399 |
| C | -4.53228738249058 | 2.79643885494364  | 0.57993483156048  | C | -0.22556813059729 | -0.43918319629900 | -7.57111424127878 |
| H | -4.98831975049207 | 2.13896562355565  | -1.42648925857152 | H | -2.02726764778404 | -1.45561872543226 | -6.99225082815165 |
| C | -4.57083161029307 | 4.60435348580221  | -3.57950590000755 | C | -4.47756588426602 | 1.39476698102094  | -8.00221690043343 |
| H | -3.34026788199450 | 4.54437364552866  | -1.19225951892006 | H | -2.07898309288762 | 1.41922085642943  | -7.50535915899369 |
| H | -2.54095038453523 | 3.91744852966588  | -3.34298876530386 | C | -4.29907912549375 | 1.07381927791523  | -5.52409401814264 |
| H | -5.55148005367893 | 3.77738323319190  | -1.05447245929576 | C | -2.22226601612728 | -0.84076602563330 | -9.03963096238394 |
| H | -3.73708916450134 | 2.61490086629436  | -3.35788635867106 | H | -4.15729559120715 | -0.48063342888255 | -6.99204872536063 |
| H | -5.47587333259602 | 2.39129490578734  | 0.96048835541967  | H | -4.19434593091807 | 2.44711376134034  | -7.89269943311420 |
| C | -4.47795065107833 | 4.67675065187813  | -5.09616100855693 | H | 0.12337996640104  | -0.28920948474618 | -6.54765642074092 |
| C | -4.13562282417867 | 4.02393315673511  | 1.38685236830901  | H | -4.16755283518861 | 1.05382970261321  | -8.99155169138207 |
| H | -4.40007304689924 | 5.59707506835129  | -3.14480819625206 | N | -2.29725632050607 | -0.38647698920692 | 7.03251053607481  |
| H | -3.78477313105204 | 2.00570400598796  | 0.70288697562615  | C | -1.53125531872860 | 0.82227732660224  | 7.47001762969811  |
| H | -5.58031303830944 | 4.29743912603875  | -3.28737479792136 | C | -3.79268877031719 | -0.30655666438815 | 7.16222377420074  |
| H | -4.66400279668323 | 3.69797881792647  | -5.54920055722928 | C | -0.05264287238448 | 0.55573853797762  | 7.25680728698484  |
| H | -3.48614636236290 | 5.01144106189675  | -5.41571024896516 | H | -1.86268170323342 | 1.62271422087828  | 6.80073324882086  |
| H | -5.21447933261350 | 5.37671124845226  | -5.49807664902845 | C | -4.25148108470349 | -1.05326638310291 | 8.40108089795645  |
| H | -4.08727355503681 | 3.78220018502484  | 2.45158573899698  | H | -1.96521445427542 | -1.19006083786125 | 7.57074443235615  |
| H | -4.85896815831128 | 4.83559324129088  | 1.25763765569992  | C | -4.45491649280993 | -0.85093271312632 | 5.91005216510134  |
| H | -3.14821806297840 | 4.40001667175555  | 1.10000553192411  | C | -1.82839410760231 | 1.20093798998183  | 8.90696137008237  |
| N | 7.01350512665358  | -5.82181937675496 | -1.99032030138438 | H | -4.02942208626812 | 0.75750399413949  | 7.25522175992023  |
| C | 8.10767102137763  | -5.33501745185295 | -1.11777459812594 | H | 0.51866669655388  | 1.44573469086779  | 7.52977655185475  |
| C | 7.17179373020594  | -5.50884728534330 | -3.42943250271878 | H | -4.01828771766725 | -2.11932754344316 | 8.30797103604908  |
| C | 7.82248486929455  | -5.61749148987507 | 0.34550831762501  | H | 0.16812345205488  | 0.31090375781882  | 6.21618043015840  |
| H | 8.19744825786209  | -4.26095959366419 | -1.29904647388770 | H | -3.78214486866937 | -0.67423656906924 | 9.31095213406345  |
| C | 8.32243221353877  | -6.24026066741692 | -4.09100382427564 | H | -2.01729437589328 | -0.59444868031465 | 5.96486705881910  |
| H | 6.92234272624984  | -6.83341500699549 | -1.88440049409400 | H | -1.91396479360224 | 0.70098067290854  | -5.99206021144543 |
| H | 6.22518203682692  | -5.77670625843524 | -3.90806795871232 | H | -5.5669316510410  | 1.33144653468189  | -7.94543901435494 |

|   |                   |                   |                   |   |                   |                   |                   |
|---|-------------------|-------------------|-------------------|---|-------------------|-------------------|-------------------|
| H | 9.03995817246947  | -5.81596150126296 | -1.42486053458846 | H | -3.89003012144694 | 0.46303511998125  | -4.71741402164333 |
| H | 7.29193839551315  | -4.42455213223395 | -3.50973637428720 | H | -3.97674552811205 | 2.10823461600714  | -5.37116115850952 |
| H | 8.63256005639878  | -5.15608294699231 | 0.91977297617823  | H | -5.38981022087935 | 1.04338406801691  | -5.46590534673139 |
| C | 8.35587895678120  | -5.96020011472240 | -5.58583444935390 | H | 0.28492344339582  | -0.27078444389614 | 7.89120758012246  |
| C | 7.74134975552005  | -7.10134307366924 | 0.67459226834809  | H | -5.33400249830725 | -0.95323284186705 | 8.50818182929171  |
| H | 8.21198756061264  | -7.31696250900141 | -3.91246793258082 | H | -4.14579128765386 | -0.29979141213905 | 5.02031068345741  |
| H | 6.89944844793076  | -5.10819205937636 | 0.64533576909335  | H | -4.20734826858607 | -1.90696141272107 | 5.76479414245538  |
| H | 9.27285361336835  | -5.93821482758001 | -3.63958237269694 | H | -5.53900076333300 | -0.76583439825310 | 6.01645334623264  |
| H | 8.48267536527860  | -4.89123748648884 | -5.78344694356100 | H | -2.87844163632915 | 1.45474408358108  | 9.06536727987475  |
| H | 7.42847515038531  | -6.28281797337689 | -6.06917382807483 | H | -1.55359318059703 | 0.39077701930273  | 9.59001533606950  |
| H | 9.18487075685194  | -6.48913738415657 | -6.06217688770017 | H | -1.23288982644969 | 2.07920742646991  | 9.16757317064571  |
| H | 7.64419904611838  | -7.25200383680930 | 1.75224015091398  | H | 0.25588173002024  | -1.33290482610711 | -7.97400262412531 |
| H | 8.64056538208559  | -7.62805794670112 | 0.33898583790498  | H | 0.08759841632478  | 0.41742411427416  | -8.17745580604026 |
| H | 6.87428989212698  | -7.58032722690980 | 0.20788850576590  | H | -3.29455317662860 | -1.04187154565853 | -9.08367264045726 |
| H | 6.05343091700318  | -5.38559534905938 | -1.64993422669895 | H | -1.99803821331632 | 0.02223232029904  | -9.67474151612199 |
| H | -2.63149551134250 | 3.00467112014663  | -1.23568965561710 | H | -1.70426106367473 | -1.70930572290860 | -9.45324722515573 |
